# Supplementary material
Source: publisher figshare collection journal article supplement (https://gsajournals.figshare.com/ndownloader/files/35133484)
Supplement: Supplementary file 1 [file 35133484]

## Sheet: Clusters in order
Cluster Name
ionocytes	ensembl_gene_id	gene	hnf4gCV2.vs.WTCV2 log2	hnf4aCV1.vs.WTCV1 log2	hnf4a_hnf4gCR3.vs.WTCR3 log2	hnf4gCV2.vs.WTCV2 significant	hnf4aCV1.vs.WTCV1 significant	hnf4a_hnf4gCR3.vs.WTCR3 significant
0	ENSDARG00000023217	crema	-0.120367	0.372342	1.79754	0	0	1
0	ENSDARG00000027822	tmtops2b	-1.4618	1.26155	1.64675	0	0	0
0	ENSDARG00000023484	rflna	-0.198898	1.09571	1.29889	0	0	0
0	ENSDARG00000056619	arhgap42a	-0.10023	1.069	1.29334	0	0	0
0	ENSDARG00000002909	tjp3	-0.0330207	0.239874	1.18633	0	0	0
0	ENSDARG00000099283	epb41a	0.0394368	0.752991	1.18455	0	0	0
0	ENSDARG00000031756	mef2aa	0.104246	0.988676	1.1751	0	0	0
0	ENSDARG00000056649	htatsf1	-0.129468	0.980103	1.16953	0	0	0
0	ENSDARG00000003320	fam91a1	-0.206343	0.77245	1.04357	0	0	0
0	ENSDARG00000042534	rsrc2	-0.1663	0.751722	1.04111	0	0	0
0	ENSDARG00000042518	hipk2	0.0212153	0.105618	1.04018	0	0	0
0	ENSDARG00000101903	zfyve9a	-0.0287432	0.929505	0.979399	0	0	0
0	ENSDARG00000055124	ccnl1a	0.0779727	0.608841	0.867371	0	0	0
0	ENSDARG00000057234	chtopa	-0.255963	0.700133	0.811609	0	0	0
0	ENSDARG00000031302	smap1	0.0299057	0.521665	0.784509	0	0	0
0	ENSDARG00000043283	prrg1	-0.0878309	1.29784	0.729901	0	0	0
0	ENSDARG00000014488	ca2	0.160006	0.491602	0.715309	0	0	0
0	ENSDARG00000078992	wnk1a	-0.0908899	0.0577074	0.713911	0	0	0
0	ENSDARG00000060238	uacab	0.280725	0.837651	0.711	0	0	0
0	ENSDARG00000105209	MPRIP	0.0674581	0.32047	0.704215	0	0	0
0	ENSDARG00000058946	CU856539.2	-0.130878	0.0215788	0.655769	0	0	0
0	ENSDARG00000094386	adgrg4b	-0.0761281	0.886729	0.617879	0	0	0
0	ENSDARG00000075349	si:ch73-138n13.1	-0.0360627	0.325148	0.50348	0	0	0
0	ENSDARG00000054666	pgpep1	-0.10266	0.502445	0.494987	0	0	0
0	ENSDARG00000097137	CR753876.1	-0.124564	-1.01379	0.415347	0	0	0
0	ENSDARG00000024964	patj	0.0400208	0.0749194	0.356262	0	0	0
0	ENSDARG00000004930	lmo7a	0.0810835	0.207312	0.307272	0	0	0
0	ENSDARG00000076805	leng8	-0.0718861	0.467181	0.282789	0	0	0
0	ENSDARG00000078270	CU467961.1	-0.0518315	-0.347748	0.0475281	0	0	0
0	ENSDARG00000014031	abcc2	0.13429	0.177079	0.0214024	0	0	0
0	ENSDARG00000078060	syt7b	0.406069	-0.99811	-0.0668161	0	0	0
0	ENSDARG00000116197	si:dkeyp-4c4.2	0.00600844	-0.274882	-0.10133	0	0	0
0	ENSDARG00000074575	ppp1r9alb	-0.148759	0.365017	-0.126021	0	0	0
0	ENSDARG00000028676	nuak1b	-0.183119	0.47148	-0.198838	0	0	0
0	ENSDARG00000043281	stap2b	0.0699294	0.040216	-0.542918	0	0	0
foregut epithelium
1	ENSDARG00000003808	aqp3a	0.326331	2.03116	1.98751	0	1	1
1	ENSDARG00000090401	CABZ01020840.1	-0.871296	1.25987	1.6049	0	0	0
1	ENSDARG00000057035	stoml3b	0.0705901	-0.404466	-0.519858	0	0	0
1	ENSDARG00000043729	plac8.1	-0.404033	-0.230199	-0.559066	0	0	0
1	ENSDARG00000038694	zgc:101744	0.294431	-0.99769	-1.2101	0	0	0
1	ENSDARG00000112575	CU467905.1	-0.376457	0.61112	-1.35138	0	0	0
1	ENSDARG00000104028	si:dkey-74k8.3	0.440372	-0.736241	-1.44922	0	0	0
1	ENSDARG00000037425	s100a10a	0.389678	-0.715342	-2.08261	0	0	1
ionocytes
2	ENSDARG00000058734	prdx1	-0.950381	2.99205	5.79607	0	1	1
2	ENSDARG00000076221	fthl28	0.250816	0.403088	4.56987	0	0	1
2	ENSDARG00000019236	gsr	-0.178478	2.32119	4.11817	0	1	1
2	ENSDARG00000033285	gsto2	0.0690149	0.804415	3.34947	0	0	1
2	ENSDARG00000071065	g6pd	-0.0612989	2.27544	2.88884	0	1	1
2	ENSDARG00000077549	aifm2	-0.258419	1.42745	2.86957	0	0	1
2	ENSDARG00000004754	hspa4a	-0.379021	1.29586	2.5848	0	0	1
2	ENSDARG00000102720	zgc:123284	-0.480875	0.322608	2.39244	0	0	1
2	ENSDARG00000112234	endouc	-0.140491	1.85384	1.99381	0	1	1
2	ENSDARG00000018524	midn	-0.0324235	0.823364	1.82237	0	0	1
2	ENSDARG00000013095	gclc	-0.165553	0.80587	1.7962	0	0	1
2	ENSDARG00000098153	lhfpl2b	-0.000552345	0.191301	1.72803	0	0	0
2	ENSDARG00000055974	tpmt.1	0.00557192	1.32508	1.69551	0	0	0
2	ENSDARG00000098746	dhrs13l1	-0.264575	0.873164	1.66812	0	0	0
2	ENSDARG00000102887	abhd4	-0.0740624	0.471333	1.51194	0	0	0
2	ENSDARG00000002196	bach1b	0.125658	1.09753	1.42335	0	0	0
2	ENSDARG00000117489	CU896647.1	0.377569	0.618824	1.37823	0	0	0
2	ENSDARG00000005220	pdcd6	-0.301569	0.570272	1.2571	0	0	0
2	ENSDARG00000007323	chmp4bb	-0.318213	0.89651	1.23249	0	0	0
2	ENSDARG00000023989	pef1	-0.0866489	0.465697	1.09822	0	0	0
2	ENSDARG00000100374	txnrd3	-0.247483	0.653893	1.05975	0	0	0
2	ENSDARG00000075952	mbd2	0.0645177	0.856084	1.02293	0	0	0
2	ENSDARG00000039579	cfd	0.0574248	0.97362	1.00675	0	0	0
2	ENSDARG00000011170	ndrg2	-0.186218	0.050926	0.921155	0	0	0
2	ENSDARG00000021059	alas1	-0.797397	1.27555	0.895642	0	0	0
2	ENSDARG00000098813	stx12	-0.119901	0.394287	0.668621	0	0	0
2	ENSDARG00000022183	gsto1	0.296722	0.221452	0.653663	0	0	0
2	ENSDARG00000077383	anxa11a	-0.012052	0.0563624	0.537523	0	0	0
2	ENSDARG00000033609	map1lc3a	0.0405612	0.360689	0.495911	0	0	0
2	ENSDARG00000096037	si:ch211-214j24.14	-0.320595	2.05167	0.460546	0	1	0
2	ENSDARG00000112049	cldn15a	-0.0310816	0.243264	0.219113	0	0	0
2	ENSDARG00000093124	scpp8	-1.18661	1.79104	0.0815854	0	1	0
2	ENSDARG00000038006	osr2	-0.069011	-0.464435	-0.927589	0	0	0
2	ENSDARG00000016867	rnf128a	-0.162201	-0.386663	-0.983615	0	0	0
2	ENSDARG00000104213	si:dkey-283b1.6	-0.214763	0.113997	-1.43378	0	0	0
2	ENSDARG00000058332	krt18a.2	-0.0333049	-0.367509	-8.05545	0	0	1
goblet cells
3	ENSDARG00000007377	odc1	0.101608	2.24036	4.2227	0	1	1
3	ENSDARG00000099091	CU929418.1	1.03447	2.54952	3.43356	0	1	1
3	ENSDARG00000075436	sytl2b	0.0596029	0.745325	2.48166	0	0	1
3	ENSDARG00000010641	slc20a1b	0.186809	1.29405	2.28019	0	0	1
3	ENSDARG00000004402	elovl6	-0.379351	3.0352	2.15597	0	1	1
3	ENSDARG00000031506	flvcr2b	-0.330677	0.570149	1.94213	0	0	1
3	ENSDARG00000076250	rasef	0.0079122	0.112103	1.9236	0	0	1
3	ENSDARG00000077540	f2rl1.2	0.108552	1.30706	1.9019	0	0	1
3	ENSDARG00000093864	wee1	-0.517592	0.519437	1.80069	0	0	1
3	ENSDARG00000037154	hivep3b	0.104229	1.22093	1.75953	0	0	1
3	ENSDARG00000042874	phlda2	-0.620145	1.08627	1.61098	0	0	0
3	ENSDARG00000003381	si:ch211-266g18.6	0.0857959	1.15114	1.57945	0	0	0
3	ENSDARG00000099186	slc1a5	0.0946224	1.53059	1.48328	0	0	0
3	ENSDARG00000032627	SCYL2	-0.0348834	1.04663	1.40679	0	0	0
3	ENSDARG00000013763	rrbp1a	-0.17627	-0.182908	1.32265	0	0	0
3	ENSDARG00000035676	ptp4a2b	-0.206402	0.818131	1.31275	0	0	0
3	ENSDARG00000070124	ptpn23a	-0.198297	0.59867	1.31169	0	0	0
3	ENSDARG00000074023	rbms1a	-0.0111387	0.821339	1.309	0	0	0
3	ENSDARG00000078233	ctnnd1	-0.0741702	0.628541	1.30674	0	0	0
3	ENSDARG00000074688	fbrs	-0.00886609	0.51281	1.29987	0	0	0
3	ENSDARG00000062831	si:ch73-22o12.1	-0.147742	0.768951	1.26413	0	0	0
3	ENSDARG00000012140	ccnl1b	0.0919056	0.670524	1.25496	0	0	0
3	ENSDARG00000100729	tln1	-0.079219	0.411713	1.21664	0	0	0
3	ENSDARG00000051888	ist1	-0.261812	1.09759	1.20986	0	0	0
3	ENSDARG00000040635	rnf11b	-0.0162795	0.751246	1.20457	0	0	0
3	ENSDARG00000061459	si:dkey-253i9.4	-0.0569718	0.622634	1.17849	0	0	0
3	ENSDARG00000009484	arf1	-0.115367	0.979269	1.17499	0	0	0
3	ENSDARG00000112452	crebbpb	0.0128163	0.446541	1.16443	0	0	0
3	ENSDARG00000077948	usp54a	-0.097369	1.22824	1.15163	0	0	0
3	ENSDARG00000068830	zgc:172139	-0.268139	0.801146	1.06782	0	0	0
3	ENSDARG00000015552	phactr4a	-0.0778758	0.465732	1.06748	0	0	0
3	ENSDARG00000034056	csnk1g2b	-0.180766	0.854805	1.01721	0	0	0
3	ENSDARG00000074635	abca1a	0.108429	0.661019	0.99961	0	0	0
3	ENSDARG00000062968	sbf1	-0.0440468	0.5197	0.969432	0	0	0
3	ENSDARG00000043821	klf7b	0.073197	0.558264	0.911656	0	0	0
3	ENSDARG00000060729	trim8b	-0.0857729	0.414301	0.900684	0	0	0
3	ENSDARG00000051768	fhod1	0.0191295	1.39076	0.892825	0	0	0
3	ENSDARG00000017354	epha2a	-0.429461	1.48844	0.857911	0	0	0
3	ENSDARG00000038012	fam83fa	-0.270525	0.287174	0.794192	0	0	0
3	ENSDARG00000021082	sec31a	-0.175895	0.25925	0.766372	0	0	0
3	ENSDARG00000099371	cygb1	0.0659596	0.268479	0.760754	0	0	0
3	ENSDARG00000011564	sfpq	0.0395043	0.474616	0.740883	0	0	0
3	ENSDARG00000088087	kdm6ba	0.0592839	-0.200758	0.69668	0	0	0
3	ENSDARG00000015495	klf3	0.238047	0.092769	0.509707	0	0	0
3	ENSDARG00000021987	plecb	-0.0772049	0.279458	0.480302	0	0	0
3	ENSDARG00000007863	tra2a	-0.048703	0.635548	0.425695	0	0	0
3	ENSDARG00000061732	raph1b	-0.151962	0.0402037	0.397446	0	0	0
3	ENSDARG00000009525	tial1	-0.164926	0.516593	0.384264	0	0	0
3	ENSDARG00000035326	nccrp1	-0.16222	0.197079	0.293001	0	0	0
3	ENSDARG00000025076	marveld2a	-0.241574	0.484376	0.22719	0	0	0
3	ENSDARG00000036943	golph3l	-0.153463	0.695009	0.221414	0	0	0
3	ENSDARG00000039661	slc36a4	0.18661	0.0216211	0.0981822	0	0	0
3	ENSDARG00000100020	pim1	-0.187028	0.0187866	0.0955214	0	0	0
3	ENSDARG00000086838	itga2.3	-0.463163	-0.057156	0.0539604	0	0	0
3	ENSDARG00000019316	fer1l6	-0.0904062	0.0881046	0.0448192	0	0	0
3	ENSDARG00000099902	il17rc	0.0318578	0.713239	-0.0166788	0	0	0
3	ENSDARG00000063050	rc3h2	-0.0162382	-0.0129335	-0.0962008	0	0	0
3	ENSDARG00000100621	CABZ01080550.1	-0.825284	-0.705759	-0.109097	0	0	0
3	ENSDARG00000027249	btg1	0.141235	-0.082334	-0.129367	0	0	0
3	ENSDARG00000052652	fermt1	-0.143091	0.596459	-0.262174	0	0	0
3	ENSDARG00000096599	AL928650.3	-0.228965	-1.23811	-0.422236	0	0	0
3	ENSDARG00000045946	sec24d	0.0560804	-0.441494	-0.527153	0	0	0
3	ENSDARG00000098397	FP016106.1	-0.093643	-1.13626	-0.75582	0	0	0
3	ENSDARG00000069390	itga2.1	-0.472809	-0.431049	-0.850475	0	0	0
3	ENSDARG00000078349	zmp:0000000845	-0.671218	-2.46804	-4.28468	0	1	1
enterocytes (segment 1)
4	ENSDARG00000036239	gatm	-0.0845093	0.0847568	2.5012	0	0	1
4	ENSDARG00000013522	pck1	0.301862	0.18988	2.30736	0	0	1
4	ENSDARG00000038106	slc37a4a	-0.131421	-0.0513537	0.592465	0	0	0
4	ENSDARG00000000069	dap	0.193036	-0.288367	0.582239	0	0	0
4	ENSDARG00000044751	ddt	0.0503499	-0.0918128	0.536412	0	0	0
4	ENSDARG00000012076	apoa1a	0.286641	-0.296379	0.376656	0	0	0
4	ENSDARG00000005713	ethe1	-0.100767	-0.536089	0.213276	0	0	0
4	ENSDARG00000014794	uqcrc2a	-0.0738997	0.365418	0.212244	0	0	0
4	ENSDARG00000043848	sod1	-0.0140323	-0.442516	0.204826	0	0	0
4	ENSDARG00000045230	cox6b1	-0.403054	0.571149	0.126209	0	0	0
4	ENSDARG00000092170	apoc1	-0.260025	-0.253312	-0.0399264	0	0	0
4	ENSDARG00000093044	si:ch211-161h7.5	0.624423	-0.340121	-0.0404733	0	0	0
4	ENSDARG00000052712	suclg1	-0.0507925	-0.213311	-0.104138	0	0	0
4	ENSDARG00000043511	prdx6	-0.322169	-0.57302	-0.196521	0	0	0
4	ENSDARG00000044914	suclg2	-0.161114	-0.253316	-0.312224	0	0	0
4	ENSDARG00000101324	apoa1b	-0.195137	-0.346051	-0.317974	0	0	0
4	ENSDARG00000016649	akr7a3	-0.286815	-0.258995	-0.318047	0	0	0
4	ENSDARG00000041068	got2a	-0.00887099	-0.0933525	-0.393738	0	0	0
4	ENSDARG00000035882	rida	0.163605	-1.24685	-0.553885	0	0	0
4	ENSDARG00000025375	idh1	0.40957	-0.56549	-0.568005	0	0	0
4	ENSDARG00000015662	pla2g12b	0.344572	-0.593148	-0.62805	0	0	0
4	ENSDARG00000012903	slc34a2a	0.387812	0.0924625	-0.727687	0	0	0
4	ENSDARG00000102249	pepd	-0.0519961	-0.506964	-0.741968	0	0	0
4	ENSDARG00000001870	atp1a1a.4	0.442699	-0.283233	-0.752869	0	0	0
4	ENSDARG00000024278	adh8b	0.380464	-0.510937	-0.794419	0	0	0
4	ENSDARG00000023820	faxdc2	0.143073	-0.339689	-0.85087	0	0	0
4	ENSDARG00000101074	glud1b	0.139576	-0.564904	-0.89745	0	0	0
4	ENSDARG00000022767	apobb.1	0.105876	-1.51423	-0.997436	0	0	0
4	ENSDARG00000068478	gpx4a	-0.0443729	-1.58237	-1.061	0	0	0
4	ENSDARG00000005191	ahcy	0.0918904	-0.846376	-1.06286	0	0	0
4	ENSDARG00000056108	ndufa4	-1.18783	1.07989	-1.09988	0	0	0
4	ENSDARG00000043257	ckbb	-0.0252002	-1.06503	-1.21309	0	0	0
4	ENSDARG00000039007	eno3	-0.00892265	-0.38293	-1.25442	0	0	0
4	ENSDARG00000092155	apoc2	-0.140283	-2.81048	-1.30307	0	1	0
4	ENSDARG00000017772	mdh1aa	0.331239	-0.785014	-1.48525	0	0	0
4	ENSDARG00000070844	gamt	0.18902	-1.80116	-1.52216	0	1	0
4	ENSDARG00000105187	gcshb	0.0664556	-0.407712	-1.57108	0	0	0
4	ENSDARG00000098645	rgn	-0.319337	-1.33193	-1.58349	0	0	0
4	ENSDARG00000053853	slc13a2	0.215784	-0.955004	-1.68605	0	0	0
4	ENSDARG00000104347	rtn4b	0.172399	-1.34272	-1.7845	0	0	1
4	ENSDARG00000071592	aqp8a.2	0.0213188	-0.650563	-2.05573	0	0	1
4	ENSDARG00000003113	ada	0.187972	-0.719149	-2.08728	0	0	1
4	ENSDARG00000043457	gapdh	0.0932969	-0.876224	-2.11342	0	0	1
4	ENSDARG00000103785	sult2st2	0.308942	-1.4578	-2.23865	0	0	1
4	ENSDARG00000070057	si:dkey-69o16.5	0.113563	-1.29375	-2.37737	0	0	1
4	ENSDARG00000061858	zgc:153968	-0.0409143	-1.90775	-2.41196	0	1	1
4	ENSDARG00000035544	etnppl	0.00311306	-1.65105	-2.5159	0	0	1
4	ENSDARG00000040298	apoa4b.1	0.225132	-1.28892	-2.5293	0	0	1
4	ENSDARG00000012194	scp2a	0.116236	-1.57417	-2.61961	0	0	1
4	ENSDARG00000037307	gnpda1	-0.350172	-0.891469	-2.65029	0	0	1
4	ENSDARG00000105351	si:ch211-113d11.6	0.00695168	-0.0334265	-3.35236	0	0	1
4	ENSDARG00000003615	slc26a3.2	-0.158137	-0.699782	-3.35283	0	0	1
4	ENSDARG00000020364	fbp1b	0.185878	-1.0676	-3.42911	0	0	1
4	ENSDARG00000042428	gstt1a	0.385115	-1.72171	-3.43712	0	0	1
4	ENSDARG00000025595	agmo	0.132234	-1.02968	-3.64627	0	0	1
4	ENSDARG00000018459	msrb2	-0.311577	-1.95795	-3.64646	0	1	1
4	ENSDARG00000056203	si:ch211-201h21.5	-0.184619	-0.672353	-3.86994	0	0	1
4	ENSDARG00000056719	slc6a19b	0.654451	-0.422874	-3.95003	0	0	1
4	ENSDARG00000006811	sult1st6	-0.100476	-1.61223	-4.02109	0	0	1
4	ENSDARG00000006427	fabp2	0.364507	-3.27675	-4.06327	0	1	1
4	ENSDARG00000061355	aoc1	-0.0156275	-1.34707	-4.06926	0	0	1
4	ENSDARG00000101557	scarb1	0.462449	-2.24031	-4.10954	0	1	1
4	ENSDARG00000102004	apoea	0.0252297	-5.02891	-4.37584	0	1	1
4	ENSDARG00000099185	chia.2	0.0841835	-1.51649	-4.45633	0	0	1
4	ENSDARG00000070038	rbp2a	0.472897	-2.40373	-5.10466	0	1	1
4	ENSDARG00000022261	pdzk1	0.328639	-1.28131	-5.26075	0	0	1
4	ENSDARG00000012640	cideb	0.0785351	-1.16603	-5.47679	0	0	1
4	ENSDARG00000059227	fabp1b.1	0.18699	-2.34671	-5.49688	0	1	1
4	ENSDARG00000032639	cd36	0.27212	-1.00564	-5.60197	0	0	1
4	ENSDARG00000018361	sult1st3	0.0671251	-2.88774	-6.10293	0	1	1
4	ENSDARG00000095633	si:ch211-133l5.7	0.105015	-0.875945	-6.20686	0	0	1
4	ENSDARG00000053526	enpp7.1	-0.114128	-1.20948	-6.23569	0	0	1
4	ENSDARG00000019532	fads2	1.36582	-6.36079	-6.45053	0	1	1
4	ENSDARG00000068220	mbl2	-0.851475	-0.859787	-6.46394	0	0	1
4	ENSDARG00000017882	rdh1	0.17362	-2.1073	-6.89045	0	1	1
4	ENSDARG00000045414	elovl2	0.586829	-5.70663	-7.24918	0	1	1
4	ENSDARG00000089919	si:ch211-161h7.8	-0.699942	-1.68535	-7.33125	0	0	1
4	ENSDARG00000029747	mep1a.1	0.133697	-2.33323	-8.40165	0	1	1
4	ENSDARG00000019228	mogat2	0.462418	-2.08274	-10.9642	0	1	1
4	ENSDARG00000100635	chia.1	-0.275169	-2.84045	-12.4269	0	1	1
secretory precursor
6	ENSDARG00000036721	tomm40l	-0.452624	0.929382	2.23454	0	0	1
6	ENSDARG00000099865	hnrnpabb	-0.103409	0.943235	1.69558	0	0	0
6	ENSDARG00000024561	nolc1	-0.0518782	0.833991	1.3472	0	0	0
6	ENSDARG00000039887	c1qbp	-0.210602	1.07999	1.33696	0	0	0
6	ENSDARG00000038768	mrpl12	-0.306772	1.0939	1.15732	0	0	0
6	ENSDARG00000029252	ssb	-0.198216	0.993405	1.13478	0	0	0
6	ENSDARG00000006219	gnl3	0.0223097	0.920423	1.0548	0	0	0
6	ENSDARG00000016484	dkc1	-0.0482843	0.86768	1.04899	0	0	0
6	ENSDARG00000069422	nhp2	-0.108707	1.00381	1.03205	0	0	0
6	ENSDARG00000104353	nop58	0.0189467	0.905502	1.0249	0	0	0
6	ENSDARG00000104708	ddx24	-0.0738122	0.791479	0.988986	0	0	0
6	ENSDARG00000015524	prps1a	-0.0787819	0.894655	0.982094	0	0	0
6	ENSDARG00000040666	nifk	-0.0113446	0.654323	0.955817	0	0	0
6	ENSDARG00000023299	snu13b	-0.168948	1.13624	0.895792	0	0	0
6	ENSDARG00000045776	cnbpa	-0.0752136	0.742091	0.864446	0	0	0
6	ENSDARG00000007130	mrto4	-0.0308012	0.75283	0.735166	0	0	0
6	ENSDARG00000104227	nop10	-0.10119	0.720423	0.723187	0	0	0
6	ENSDARG00000103594	npm3	-0.203014	0.840191	0.681502	0	0	0
6	ENSDARG00000014329	npm1a	-0.177493	1.08603	0.656478	0	0	0
6	ENSDARG00000059075	nip7	0.127323	0.776782	0.365244	0	0	0
6	ENSDARG00000012820	nop56	0.0769143	0.187649	0.190271	0	0	0
6	ENSDARG00000098334	exosc3	0.252664	0.564409	-0.682441	0	0	0
foregut epithelium
7	ENSDARG00000102433	sytl4	0.0405277	0.745789	1.53662	0	0	0
7	ENSDARG00000009978	icn	0.189711	0.988999	1.4316	0	0	0
7	ENSDARG00000008553	zgc:136872	0.0708373	-0.605742	0.58033	0	0	0
7	ENSDARG00000032802	ktn1	0.214778	-0.226935	-0.466842	0	0	0
7	ENSDARG00000097635	wu:fb18f06	-0.17522	0.298951	-0.895377	0	0	0
7	ENSDARG00000058327	neu3.3	-0.281317	-0.126736	-1.50289	0	0	0
7	ENSDARG00000078489	si:ch211-284d12.3	-0.691745	0.3654	-1.50971	0	0	0
enteroendocrine cells
8	ENSDARG00000035832	pyyb	0.115289	0.310909	2.57989	0	0	1
8	ENSDARG00000059054	pdk2b	0.254685	1.4716	1.99408	0	0	1
8	ENSDARG00000002216	tbx3a	0.0629146	0.754656	1.66615	0	0	0
8	ENSDARG00000045482	stk38l	-0.131464	1.68711	1.64502	0	0	0
8	ENSDARG00000101908	rab3ip	-0.0945364	0.560509	1.55752	0	0	0
8	ENSDARG00000020876	pdk2a	0.0587071	0.441398	1.41899	0	0	0
8	ENSDARG00000061120	slc43a2b	0.326357	-0.0106923	1.20381	0	0	0
8	ENSDARG00000002576	cabp5a	0.543624	1.16196	1.17533	0	0	0
8	ENSDARG00000099184	map2k6	-0.0821287	-0.357968	1.08411	0	0	0
8	ENSDARG00000054239	ghrl	-0.0666695	0.678215	1.04637	0	0	0
8	ENSDARG00000038900	acadm	-0.0247211	0.0770634	0.870467	0	0	0
8	ENSDARG00000094557	nupr1b	-0.263082	-0.180021	0.828721	0	0	0
8	ENSDARG00000007449	slc25a39	-0.381958	0.0688428	0.775892	0	0	0
8	ENSDARG00000006747	tmem178b	0.0730304	0.809094	0.694342	0	0	0
8	ENSDARG00000056322	ldb3a	0.258798	0.836175	0.523262	0	0	0
8	ENSDARG00000075831	slc7a8a	0.223704	0.29377	0.390655	0	0	0
8	ENSDARG00000009242	fev	-0.00264534	-0.0350377	0.332357	0	0	0
8	ENSDARG00000087798	pdyn	-0.0116278	0.466461	0.238752	0	0	0
8	ENSDARG00000070425	dll4	0.0567481	0.252972	0.211585	0	0	0
8	ENSDARG00000055781	ptger3	-0.134971	-0.385594	-0.116524	0	0	0
8	ENSDARG00000076122	si:ch211-160b11.4	-0.241207	-0.211768	-0.191106	0	0	0
8	ENSDARG00000014190	sst2	0.23273	0.376083	-0.846419	0	0	0
8	ENSDARG00000092916	mlnl	-0.141459	-1.07006	-0.961415	0	0	0
8	ENSDARG00000094730	acbd7	-0.838748	-0.799389	-1.45014	0	0	0
8	ENSDARG00000003931	cndp2	0.0097692	-0.950754	-1.54841	0	0	0
8	ENSDARG00000008637	mttp	0.0101791	-0.995185	-2.03567	0	0	1
8	ENSDARG00000026017	xpnpep2	0.0457869	-0.854747	-2.22595	0	0	1
8	ENSDARG00000044528	slc15a1b	0.321329	-0.604654	-4.45865	0	0	1
enterocytes (segment 3, pronephric ducts?)
9	ENSDARG00000058206	si:ch211-153b23.5	-1.39622	0.949966	1.9681	0	0	1
9	ENSDARG00000096888	serpinb1l4	0.379121	1.30019	1.63169	0	0	0
9	ENSDARG00000117669	CABZ01087025.3	0.474414	1.09886	1.6135	0	0	0
9	ENSDARG00000099124	f3a	-0.114727	1.44489	1.58798	0	0	0
9	ENSDARG00000099717	si:rp71-1h20.9	-0.173147	1.0831	1.56125	0	0	0
9	ENSDARG00000030094	malb	0.058114	0.584785	1.46243	0	0	0
9	ENSDARG00000096616	si:ch211-255p10.3	0.341728	1.9561	1.24919	0	1	0
9	ENSDARG00000073820	zgc:174917	-1.41952	1.33712	1.2421	0	0	0
9	ENSDARG00000104919	si:ch211-153b23.3	-2.05478	1.29504	1.16332	0	0	0
9	ENSDARG00000091658	sptssb	0.306369	0.740558	1.15909	0	0	0
9	ENSDARG00000102115	ndufc2	-0.273197	0.563699	0.94753	0	0	0
9	ENSDARG00000052859	chp1	-0.15424	0.261336	0.944357	0	0	0
9	ENSDARG00000062788	irg1l	-1.76323	1.11869	0.923803	0	0	0
9	ENSDARG00000060109	aggf1	-0.0257205	0.741824	0.863027	0	0	0
9	ENSDARG00000090444	ponzr1	-0.432376	0.470689	0.861143	0	0	0
9	ENSDARG00000038577	cox6c	-0.114023	0.424771	0.835324	0	0	0
9	ENSDARG00000004692	nabp1a	-0.422222	1.02726	0.670262	0	0	0
9	ENSDARG00000089307	pmaip1	0.195181	-0.453546	0.668423	0	0	0
9	ENSDARG00000006840	gnmt	-0.156047	0.289813	0.668286	0	0	0
9	ENSDARG00000078674	hspb9	-0.0724535	1.39574	0.668243	0	0	0
9	ENSDARG00000095897	atp5f1e	0.0263812	0.26761	0.571544	0	0	0
9	ENSDARG00000060622	si:ch73-14h1.2	-0.406768	0.668944	0.200181	0	0	0
9	ENSDARG00000056012	eve1	-0.347441	-0.111647	-0.663515	0	0	0
9	ENSDARG00000103639	si:dkey-36i7.3	0.0897124	-0.660081	-1.23775	0	0	0
9	ENSDARG00000074754	si:dkey-188i13.9	0.072441	-2.99236	-3.46784	0	1	1
9	ENSDARG00000093619	sult3st2	-0.624037	-0.921067	-4.36335	0	0	1
foregut epithelium
10	ENSDARG00000060471	gcnt3	-0.0932666	1.66543	2.37611	0	0	1
10	ENSDARG00000030914	tmem120a	-0.288551	1.59277	2.30814	0	0	1
10	ENSDARG00000078643	vtcn1	0.0188505	1.08098	2.12851	0	0	1
10	ENSDARG00000099470	muc5.3	-0.0347113	0.811412	2.02356	0	0	1
10	ENSDARG00000029356	mboat1	-0.0245612	1.3707	1.99987	0	0	1
10	ENSDARG00000097503	si:ch73-288o11.5	0.263186	1.44116	1.9281	0	0	1
10	ENSDARG00000001909	vill	0.257328	1.6358	1.92183	0	0	1
10	ENSDARG00000103034	CABZ01068499.1	0.344286	1.31732	1.79926	0	0	1
10	ENSDARG00000090190	bcam	0.293593	1.49715	1.64877	0	0	0
10	ENSDARG00000060498	tnfrsf9a	-1.39256	0.660617	1.57188	0	0	0
10	ENSDARG00000091699	capn2a	-0.0541706	1.55668	1.5457	0	0	0
10	ENSDARG00000054864	aplp2	0.0343857	0.496525	1.46719	0	0	0
10	ENSDARG00000002445	prdm1a	-0.125503	1.27503	1.40054	0	0	0
10	ENSDARG00000101479	BX908782.2	-2.19835	3.04168	1.33398	1	1	0
10	ENSDARG00000057121	c7b	-2.12676	1.22256	1.16254	0	0	0
10	ENSDARG00000010276	ptgs2b	-0.480281	2.53048	1.15667	0	1	0
10	ENSDARG00000004539	ptgs2a	-0.299236	2.1593	1.07886	0	1	0
10	ENSDARG00000014577	rhpn2	0.169384	1.08996	1.00547	0	0	0
10	ENSDARG00000105590	si:cabz01007794.1	0.346368	1.67886	0.960956	0	0	0
10	ENSDARG00000020761	arrdc2	0.0984524	0.894371	0.842877	0	0	0
10	ENSDARG00000069453	zgc:113314	-1.04506	1.87072	0.775352	0	1	0
10	ENSDARG00000034240	capza1a	-0.12652	0.818823	0.769504	0	0	0
10	ENSDARG00000001880	stx3a	-0.0384403	0.0933442	0.724328	0	0	0
10	ENSDARG00000097959	si:dkey-248g15.3	0.40622	0.748318	0.668709	0	0	0
10	ENSDARG00000018787	efna1b	0.0190898	0.892413	0.408426	0	0	0
10	ENSDARG00000015654	ca15a	0.796915	1.36744	0.119643	0	0	0
10	ENSDARG00000040009	palld	0.0842001	0.182102	0.112978	0	0	0
10	ENSDARG00000103457	spartb	-0.234708	-0.104729	-0.487045	0	0	0
10	ENSDARG00000033227	lect2l	-1.3332	2.16817	-0.942361	0	1	0
10	ENSDARG00000062278	si:dkey-202e17.1	-0.0331143	-0.108951	-1.01231	0	0	0
10	ENSDARG00000114554	cdx1a	-0.461382	-0.48345	-1.22531	0	0	0
10	ENSDARG00000086826	sult6b1	0.26502	-0.578941	-1.6003	0	0	0
enteroendocrine cells
11	ENSDARG00000058464	rasd3	0.709531	1.24355	2.87341	0	0	1
11	ENSDARG00000015543	s100a1	-0.507106	2.43443	2.77	0	1	1
11	ENSDARG00000076546	trhra	0.272958	0.522827	2.23941	0	0	1
11	ENSDARG00000043342	gpx3	-0.231937	1.66667	1.91011	0	0	1
11	ENSDARG00000040027	osbpl10b	0.0170085	1.03905	1.79748	0	0	1
11	ENSDARG00000037020	kif1b	-0.147131	1.18506	1.67455	0	0	0
11	ENSDARG00000003189	psmd1	-0.360473	0.676787	1.61268	0	0	0
11	ENSDARG00000059945	sv2a	0.0936131	0.708117	1.10007	0	0	0
11	ENSDARG00000070810	ccka	0.0640095	0.518346	0.928299	0	0	0
11	ENSDARG00000074425	si:busm1-57f23.1	-0.393502	1.48661	0.850656	0	0	0
11	ENSDARG00000099233	si:zfos-2372e4.1	0.568934	0.157856	0.66655	0	0	0
11	ENSDARG00000040177	rgs16	-0.637067	0.824667	0.321757	0	0	0
11	ENSDARG00000030157	mybpc2a	0.738426	1.88281	0.268448	0	1	0
11	ENSDARG00000012684	atp2b1a	-0.199346	-0.510909	0.247616	0	0	0
11	ENSDARG00000055395	foxq1b	0.0806985	-0.184751	0.117683	0	0	0
11	ENSDARG00000098880	pclob	-0.187678	0.401435	0.109583	0	0	0
11	ENSDARG00000032571	il20ra	-0.048776	-0.624864	0.0247157	0	0	0
11	ENSDARG00000021336	pax4	-0.929028	-0.106662	-0.516941	0	0	0
11	ENSDARG00000024694	myo1b	0.0214165	-0.181783	-0.543832	0	0	0
11	ENSDARG00000089507	ugt1b5	0.0505718	-0.990638	-0.721584	0	0	0
11	ENSDARG00000044685	nr0b2a	-1.01285	-2.7332	-1.16819	0	1	0
11	ENSDARG00000112125	FP236331.1	-0.0699388	-0.750679	-2.07827	0	0	1
enteroendocrine cells
12	ENSDARG00000089331	urahb	1.23521	0.211358	6.81739	0	0	1
12	ENSDARG00000077799	egr4	0.673207	-0.0378228	4.07163	0	0	1
12	ENSDARG00000002656	stxbp5a	0.0822884	0.115054	2.68967	0	0	1
12	ENSDARG00000098662	si:ch73-359m17.9	0.21473	1.67973	2.59285	0	0	1
12	ENSDARG00000000796	nr4a1	0.396136	-0.17756	2.57065	0	0	1
12	ENSDARG00000069503	cldnh	0.174661	0.971086	2.32216	0	0	1
12	ENSDARG00000075121	hbegfa	0.0627613	1.73637	1.94034	0	0	1
12	ENSDARG00000037747	fscn1b	-0.87598	0.586058	1.93406	0	0	1
12	ENSDARG00000091061	slc38a3b	0.0895804	2.32747	1.89526	0	1	1
12	ENSDARG00000075819	arhgef2	-0.256161	1.26621	1.77379	0	0	1
12	ENSDARG00000039943	tent5ba	-0.288606	0.685979	1.68862	0	0	0
12	ENSDARG00000104815	lmx1ba	-0.228445	1.31766	1.64938	0	0	0
12	ENSDARG00000034048	zgc:92275	0.294706	0.24647	1.53619	0	0	0
12	ENSDARG00000045842	zgc:113263	-0.0123044	1.40071	1.40137	0	0	0
12	ENSDARG00000099241	ppp2cb	-0.231343	0.8534	1.34966	0	0	0
12	ENSDARG00000100515	dusp1	0.198393	-0.720116	1.3208	0	0	0
12	ENSDARG00000014462	rab3c	-0.578944	0.833549	1.29111	0	0	0
12	ENSDARG00000077167	nmbb	0.674295	0.822424	1.19257	0	0	0
12	ENSDARG00000029621	sgms1	-0.166197	0.830195	1.18086	0	0	0
12	ENSDARG00000044083	peli1b	-0.042888	0.843017	1.16247	0	0	0
12	ENSDARG00000008867	rap1b	-0.176002	1.05822	1.11451	0	0	0
12	ENSDARG00000013750	eno1b	-0.164788	2.10629	1.07796	0	1	0
12	ENSDARG00000057665	sprn2	0.243648	0.246092	1.00798	0	0	0
12	ENSDARG00000004232	dlb	-0.0768604	1.21324	0.986134	0	0	0
12	ENSDARG00000061481	wu:fj05g07	0.251478	0.0199129	0.893011	0	0	0
12	ENSDARG00000029112	gem	-0.159748	0.836701	0.861205	0	0	0
12	ENSDARG00000018328	rhocb	-0.0171723	0.485881	0.859731	0	0	0
12	ENSDARG00000104676	prkd2	0.0891294	0.257602	0.827221	0	0	0
12	ENSDARG00000086790	gucy1b1	-0.0251483	0.581849	0.824426	0	0	0
12	ENSDARG00000052866	htt	-0.119544	0.322834	0.812993	0	0	0
12	ENSDARG00000003697	slc5a8l	0.100155	0.394903	0.80531	0	0	0
12	ENSDARG00000101095	cpne4a	-0.204262	0.643193	0.784514	0	0	0
12	ENSDARG00000071395	camk2g1	0.236775	0.62518	0.781215	0	0	0
12	ENSDARG00000056633	fgf13b	-0.0377804	1.03457	0.771292	0	0	0
12	ENSDARG00000076280	ppp1r1b	-0.00764221	1.35605	0.767623	0	0	0
12	ENSDARG00000031246	hbegfb	-0.123635	0.237835	0.761291	0	0	0
12	ENSDARG00000089413	mbpb	0.0251027	0.541901	0.748053	0	0	0
12	ENSDARG00000111612	mapkapk3	0.0288082	0.816369	0.746227	0	0	0
12	ENSDARG00000024785	ctnna2	-0.140286	0.182326	0.732825	0	0	0
12	ENSDARG00000035986	ptpn2b	-0.059213	0.5243	0.690718	0	0	0
12	ENSDARG00000012513	sdcbp2	-0.283864	0.659378	0.635385	0	0	0
12	ENSDARG00000005112	cdh17	-0.0307893	-0.136343	0.630161	0	0	0
12	ENSDARG00000097652	si:dkey-234i14.2	-0.0640726	0.0167574	0.6023	0	0	0
12	ENSDARG00000010816	slc7a14a	-0.0356101	0.291569	0.594491	0	0	0
12	ENSDARG00000071872	zdhhc15b	-0.274218	0.577378	0.555329	0	0	0
12	ENSDARG00000062217	kcnj3b	0.132087	0.350053	0.544567	0	0	0
12	ENSDARG00000000853	dstyk	0.265811	0.0561698	0.527383	0	0	0
12	ENSDARG00000053559	tspan3b	-0.0848234	-0.402675	0.514667	0	0	0
12	ENSDARG00000036082	tph1b	-0.468001	0.728852	0.498566	0	0	0
12	ENSDARG00000069763	etv5a	0.160498	1.04534	0.486604	0	0	0
12	ENSDARG00000104573	slc12a2	-0.13886	1.11054	0.480221	0	0	0
12	ENSDARG00000004869	penka	-0.349861	0.516918	0.471775	0	0	0
12	ENSDARG00000098368	aplp1	0.0726773	0.0224679	0.438796	0	0	0
12	ENSDARG00000040965	zgc:101731	-0.0242633	0.738022	0.431589	0	0	0
12	ENSDARG00000043299	nmu	-0.344093	0.64754	0.425271	0	0	0
12	ENSDARG00000045131	id4	-0.133443	0.477931	0.410093	0	0	0
12	ENSDARG00000006878	phf21aa	0.303941	0.449295	0.344062	0	0	0
12	ENSDARG00000059333	si:ch211-285f17.1	-0.0450756	0.0829504	0.32512	0	0	0
12	ENSDARG00000104695	BX088587.1	0.348086	-0.288737	0.315908	0	0	0
12	ENSDARG00000031875	trpa1b	-0.232004	0.298198	0.311495	0	0	0
12	ENSDARG00000001710	flot1a	0.0584403	0.788529	0.22203	0	0	0
12	ENSDARG00000040465	irf2	0.0286905	-0.0268485	0.221946	0	0	0
12	ENSDARG00000002600	pcsk1	-0.274621	0.367018	0.152136	0	0	0
12	ENSDARG00000002758	dedd1	-0.0438997	0.084575	0.095868	0	0	0
12	ENSDARG00000063088	si:dkey-211g8.6	-0.644511	0.304205	0.0385682	0	0	0
12	ENSDARG00000018817	bdnf	-0.109839	0.826117	0.0333956	0	0	0
12	ENSDARG00000018303	etv4	0.0581608	0.944642	0.019921	0	0	0
12	ENSDARG00000015575	cyp3c1	-0.216919	-0.0169833	-0.0416756	0	0	0
12	ENSDARG00000105630	alpk3b	0.100789	0.893799	-0.0544081	0	0	0
12	ENSDARG00000006602	chrna2a	0.0072213	-0.403971	-0.0992905	0	0	0
12	ENSDARG00000019986	grhprb	-0.164191	0.0192658	-0.151438	0	0	0
12	ENSDARG00000051915	pde5ab	0.196946	-0.347215	-0.205267	0	0	0
12	ENSDARG00000079553	cd83	-1.26312	-0.546773	-0.26203	0	0	0
12	ENSDARG00000055365	si:dkey-25e12.3	-1.08532	0.952838	-0.299181	0	0	0
12	ENSDARG00000009950	edf1	-0.0983618	-0.478373	-0.363838	0	0	0
12	ENSDARG00000004015	adcyap1a	-0.451778	0.419173	-0.364299	0	0	0
12	ENSDARG00000044511	etv5b	-0.629597	-0.143036	-0.394562	0	0	0
12	ENSDARG00000074600	gpr78a	0.0414602	0.102738	-0.542145	0	0	0
12	ENSDARG00000096645	si:ch211-131k2.2	-0.233196	-1.56983	-0.813627	0	0	0
12	ENSDARG00000105416	adgrg4a	-0.0174525	-0.188687	-0.863593	0	0	0
12	ENSDARG00000061375	sgpl1	0.0269733	-1.13924	-1.33779	0	0	0
12	ENSDARG00000104108	slco1d1	0.0267183	-1.04324	-1.38196	0	0	0
12	ENSDARG00000061819	wscd2	0.315703	-1.10143	-1.64029	0	0	0
12	ENSDARG00000016494	ddc	-0.262582	-0.852269	-1.74503	0	0	0
12	ENSDARG00000070021	cyp3c4	0.169834	-0.947875	-2.10366	0	0	1
12	ENSDARG00000067848	nmrk2	0.0389757	-0.44317	-2.70883	0	0	1
12	ENSDARG00000069941	tdp2a	0.1475	-1.27075	-4.06863	0	0	1
goblet cells
13	ENSDARG00000041292	si:ch211-231m23.4	-0.439775	1.85233	4.77688	0	1	1
13	ENSDARG00000052115	ehf	-0.446126	1.6972	3.22688	0	0	1
13	ENSDARG00000037782	sox8b	-0.12612	1.84219	3.22395	0	1	1
13	ENSDARG00000108060	LO017771.1	-0.321053	-1.05251	2.92123	0	0	1
13	ENSDARG00000036058	gnao1b	0.174018	1.10786	2.7199	0	0	1
13	ENSDARG00000017446	camk1db	0.00708782	2.65118	2.39588	0	1	1
13	ENSDARG00000053583	cers6	0.178949	1.00183	2.3498	0	0	1
13	ENSDARG00000068168	hes2.2	-0.116893	2.13296	1.99016	0	0	1
13	ENSDARG00000008808	eml2	-0.250111	1.03017	1.97106	0	0	1
13	ENSDARG00000090607	si:dkeyp-117b11.1	-0.479161	0.24025	1.91818	0	0	1
13	ENSDARG00000078888	iqgap1	-0.117887	0.793071	1.73725	0	0	0
13	ENSDARG00000091169	tor4ab	-0.114254	-0.0181143	1.72276	0	0	0
13	ENSDARG00000029936	grtp1a	0.00285089	0.890287	1.71173	0	0	0
13	ENSDARG00000018918	rad17	-0.483881	0.617059	1.70325	0	0	0
13	ENSDARG00000057610	cdkn2c	-0.500025	1.91784	1.69525	0	1	0
13	ENSDARG00000062370	bcl2l13	-0.121032	1.3576	1.66958	0	0	0
13	ENSDARG00000015628	psmd10	-0.27233	0.723087	1.64361	0	0	0
13	ENSDARG00000101387	CAMK2N1	-0.365388	1.47729	1.63645	0	0	0
13	ENSDARG00000077530	ahctf1	-0.00570689	0.976078	1.63142	0	0	0
13	ENSDARG00000003961	parp3	-0.626722	0.65663	1.54491	0	0	0
13	ENSDARG00000008155	sms	-0.48828	1.41213	1.5156	0	0	0
13	ENSDARG00000103398	fabp1b.2	0.152814	0.806665	1.51553	0	0	0
13	ENSDARG00000006308	ptpn18	-0.198982	0.679321	1.49507	0	0	0
13	ENSDARG00000117263	CABZ01056054.1	-0.808555	1.33167	1.48551	0	0	0
13	ENSDARG00000088167	si:ch211-112g6.4	-0.814511	0.666287	1.45795	0	0	0
13	ENSDARG00000018159	ano10b	0.319879	1.20826	1.44679	0	0	0
13	ENSDARG00000045305	pde7a	0.0047935	1.20585	1.43565	0	0	0
13	ENSDARG00000010145	tor4aa	-0.26607	0.945511	1.4016	0	0	0
13	ENSDARG00000098591	tubb2b	-0.0702599	0.574353	1.36843	0	0	0
13	ENSDARG00000045156	rgs9b	-0.777984	0.182967	1.35127	0	0	0
13	ENSDARG00000079175	si:ch211-79k12.1	0.0807177	0.459175	1.34569	0	0	0
13	ENSDARG00000044760	gnaia	-0.1186	1.21425	1.33145	0	0	0
13	ENSDARG00000010301	b4galt6	-0.12095	1.08363	1.32229	0	0	0
13	ENSDARG00000087870	adgrf3a	-0.465991	0.534014	1.30252	0	0	0
13	ENSDARG00000074782	adgrg3	-0.446127	1.02796	1.28748	0	0	0
13	ENSDARG00000063535	chd4a	-0.169735	0.599483	1.28677	0	0	0
13	ENSDARG00000015427	hdac1	-0.129538	0.910781	1.285	0	0	0
13	ENSDARG00000069504	si:dkey-88e18.2	-0.633522	1.83993	1.28294	0	1	0
13	ENSDARG00000078308	spry2	0.0375675	0.781132	1.28211	0	0	0
13	ENSDARG00000019398	psma6a	-0.438476	0.751516	1.27584	0	0	0
13	ENSDARG00000004592	gpr22a	0.170455	0.780251	1.25992	0	0	0
13	ENSDARG00000041413	adgrg11	0.0800025	0.936849	1.25049	0	0	0
13	ENSDARG00000053447	ppp4r2b	-0.248084	0.925887	1.2468	0	0	0
13	ENSDARG00000099445	cc2d1b	-0.367444	0.962561	1.24453	0	0	0
13	ENSDARG00000019063	fat1b	0.235809	1.95757	1.24329	0	1	0
13	ENSDARG00000071113	xirp2a	-0.203534	1.32246	1.21783	0	0	0
13	ENSDARG00000090454	gnb1a	-0.0413482	0.686198	1.21161	0	0	0
13	ENSDARG00000042908	hsh2d	-0.409332	0.565008	1.2028	0	0	0
13	ENSDARG00000058325	casp8	-0.567752	1.03994	1.17109	0	0	0
13	ENSDARG00000006299	arhgef7a	-0.364234	0.827024	1.1542	0	0	0
13	ENSDARG00000028228	zbtb18	0.153446	0.780156	1.14476	0	0	0
13	ENSDARG00000059342	avil	0.0894009	1.2302	1.14075	0	0	0
13	ENSDARG00000077260	si:dkey-28d5.13	-1.21948	0.440576	1.13296	0	0	0
13	ENSDARG00000053542	kctd12.2	-0.184681	0.58348	1.12892	0	0	0
13	ENSDARG00000003293	sox9a	0.0136557	1.34611	1.1204	0	0	0
13	ENSDARG00000034293	hif1ab	-0.0506079	0.604669	1.11603	0	0	0
13	ENSDARG00000053113	ly75	-0.130118	0.405474	1.08246	0	0	0
13	ENSDARG00000103783	cyyr1	0.0656308	1.08468	1.06442	0	0	0
13	ENSDARG00000104372	gnb1b	-0.064103	0.712401	1.06007	0	0	0
13	ENSDARG00000008030	myl9b	-0.0265768	0.832126	1.05841	0	0	0
13	ENSDARG00000004301	rhogb	-0.451603	1.12003	1.04035	0	0	0
13	ENSDARG00000074390	tmem176l.4	-0.19938	1.55029	1.03338	0	0	0
13	ENSDARG00000075626	zgc:172090	-0.417799	7.71148	1.02597	0	1	0
13	ENSDARG00000040237	mef2d	0.0289763	0.533559	1.02494	0	0	0
13	ENSDARG00000035715	marcksl1b	-0.309894	0.954463	1.01691	0	0	0
13	ENSDARG00000103589	gata6	0.0406736	-0.0551602	1.01493	0	0	0
13	ENSDARG00000039215	arrb2a	-0.158057	0.425338	1.01161	0	0	0
13	ENSDARG00000069006	tle3b	0.263659	0.276855	1.00168	0	0	0
13	ENSDARG00000104043	gng10	0.161112	0.896059	0.997581	0	0	0
13	ENSDARG00000098377	tnfrsf11b	-0.532303	1.73481	0.99564	0	0	0
13	ENSDARG00000103914	THEM6	-0.640334	0.595342	0.990369	0	0	0
13	ENSDARG00000057867	lasp1	0.11353	0.955833	0.987022	0	0	0
13	ENSDARG00000011824	pbxip1b	0.0966354	0.348373	0.97914	0	0	0
13	ENSDARG00000058647	hck	-0.71866	1.29748	0.971716	0	0	0
13	ENSDARG00000031108	lrba	-0.133991	0.665584	0.966277	0	0	0
13	ENSDARG00000101443	relch	-0.219257	0.21756	0.965145	0	0	0
13	ENSDARG00000060978	atp2a3	0.132149	0.673836	0.957501	0	0	0
13	ENSDARG00000020625	jak1	-0.272122	0.687291	0.946946	0	0	0
13	ENSDARG00000029544	id2b	0.677941	0.844676	0.945709	0	0	0
13	ENSDARG00000044261	si:ch211-243g18.2	-0.147407	2.20176	0.930626	0	1	0
13	ENSDARG00000033738	zgc:153867	-0.0594866	0.62175	0.924335	0	0	0
13	ENSDARG00000059001	pim2	-0.137853	0.951442	0.919194	0	0	0
13	ENSDARG00000054903	mta3	-0.0206419	0.578715	0.909582	0	0	0
13	ENSDARG00000074184	arhgap32b	-0.0298151	0.0672176	0.905919	0	0	0
13	ENSDARG00000093673	si:dkey-28d5.4	-0.291375	1.34759	0.887811	0	0	0
13	ENSDARG00000102762	pik3r5	-0.583346	1.02296	0.885913	0	0	0
13	ENSDARG00000013051	zgc:158412	-0.512915	1.26775	0.880832	0	0	0
13	ENSDARG00000057491	n4bp1	-0.100766	0.3944	0.872967	0	0	0
13	ENSDARG00000098228	thrap3b	-0.0759401	0.570492	0.859167	0	0	0
13	ENSDARG00000098845	lrp12	0.0564728	0.529275	0.857439	0	0	0
13	ENSDARG00000017757	pik3cg	-0.289222	0.245941	0.846572	0	0	0
13	ENSDARG00000020893	slc25a55a	-0.0802818	1.00837	0.841312	0	0	0
13	ENSDARG00000035357	gnb2	-0.0319079	0.791038	0.838819	0	0	0
13	ENSDARG00000037883	prcp	0.0167796	0.528132	0.818106	0	0	0
13	ENSDARG00000040884	mxi1	-0.147517	0.458484	0.80763	0	0	0
13	ENSDARG00000057273	alox5a	-0.222437	0.673418	0.788022	0	0	0
13	ENSDARG00000052703	cisd2	-0.343497	0.575455	0.777115	0	0	0
13	ENSDARG00000052387	pou2f3	-0.0947989	1.54198	0.771352	0	0	0
13	ENSDARG00000016143	xiap	0.142999	0.445708	0.758696	0	0	0
13	ENSDARG00000116139	cdx1b	-0.215372	0.160023	0.746894	0	0	0
13	ENSDARG00000016084	spsb4a	0.262705	1.07572	0.74664	0	0	0
13	ENSDARG00000104408	zgc:152774	-0.0695157	-0.307235	0.742651	0	0	0
13	ENSDARG00000008097	srsf9	-0.217599	0.341932	0.739517	0	0	0
13	ENSDARG00000058522	shq1	-0.0638698	0.759107	0.720497	0	0	0
13	ENSDARG00000034643	fhl3a	-0.113828	0.731517	0.711884	0	0	0
13	ENSDARG00000070822	cnp	-0.118911	0.235851	0.700075	0	0	0
13	ENSDARG00000102599	si:ch1073-392o20.2	-0.209289	0.90528	0.697273	0	0	0
13	ENSDARG00000062532	washc2c	-0.207248	0.576934	0.693189	0	0	0
13	ENSDARG00000087804	tnfrsf11a	-0.288577	1.01255	0.690054	0	0	0
13	ENSDARG00000026829	cotl1	-0.383681	0.52509	0.683115	0	0	0
13	ENSDARG00000043131	BX664625.1	-0.155994	0.632267	0.67478	0	0	0
13	ENSDARG00000101429	si:ch73-208h1.1	-0.895159	1.95775	0.670168	0	1	0
13	ENSDARG00000098465	si:ch73-366l1.5	0.351995	0.963668	0.644006	0	0	0
13	ENSDARG00000058638	si:ch211-71m22.1	-0.367142	0.0199752	0.631559	0	0	0
13	ENSDARG00000098792	znrf2b	-0.351223	0.420041	0.629153	0	0	0
13	ENSDARG00000079434	tmem131l	-0.055155	0.139789	0.622226	0	0	0
13	ENSDARG00000030349	cryba2a	-0.226057	0.0856786	0.622204	0	0	0
13	ENSDARG00000105863	FO904970.1	-0.274764	-0.0708444	0.619679	0	0	0
13	ENSDARG00000036754	hmgn3	-6.81118e-05	0.634447	0.614225	0	0	0
13	ENSDARG00000099844	GNAZ	-0.0610425	0.44056	0.594425	0	0	0
13	ENSDARG00000110748	CABZ01056052.1	-0.630896	-0.223099	0.58022	0	0	0
13	ENSDARG00000098075	sh3bgrl3	-0.143184	0.245327	0.579757	0	0	0
13	ENSDARG00000076721	zgc:171686	-0.110548	0.705385	0.55452	0	0	0
13	ENSDARG00000114345	si:dkey-28d5.5	-0.281937	1.05025	0.519956	0	0	0
13	ENSDARG00000052741	card11	-0.120105	0.455119	0.518113	0	0	0
13	ENSDARG00000010411	epn1	0.00977836	0.0114468	0.511668	0	0	0
13	ENSDARG00000053488	si:ch73-22a13.3	-0.269266	1.56566	0.510447	0	0	0
13	ENSDARG00000016038	hacd3	-0.384933	0.00463277	0.50555	0	0	0
13	ENSDARG00000033436	mboat7	-0.326153	0.846474	0.494692	0	0	0
13	ENSDARG00000014050	ngfb	-0.253807	1.05662	0.487182	0	0	0
13	ENSDARG00000014599	slc5a6b	-0.400479	-0.0983983	0.485587	0	0	0
13	ENSDARG00000093312	si:dkey-83f18.4	-1.65825	0.529614	0.474858	0	0	0
13	ENSDARG00000061145	gfod2	0.131769	-0.902995	0.470758	0	0	0
13	ENSDARG00000090600	si:ch211-213a13.1	0.227507	0.785604	0.459747	0	0	0
13	ENSDARG00000101029	si:ch73-347e22.4	-0.0649054	0.614045	0.455726	0	0	0
13	ENSDARG00000069833	rhbdl2	-0.0280849	0.137278	0.455687	0	0	0
13	ENSDARG00000070954	hmx2	-0.337069	0.633487	0.43242	0	0	0
13	ENSDARG00000097483	si:ch211-213d14.2	-0.535703	1.22555	0.419594	0	0	0
13	ENSDARG00000005861	ralgapa2	0.0279105	0.0761964	0.406776	0	0	0
13	ENSDARG00000022712	stat3	-0.614331	0.512974	0.39414	0	0	0
13	ENSDARG00000074311	mast2	-0.143975	0.0541503	0.356381	0	0	0
13	ENSDARG00000045837	si:dkey-14d8.20	0.105205	1.55996	0.355438	0	0	0
13	ENSDARG00000039466	hnrnph3	-0.290387	0.669201	0.323983	0	0	0
13	ENSDARG00000079626	elf2b	-0.0731787	0.473845	0.316857	0	0	0
13	ENSDARG00000035178	gna14	-0.165197	1.9294	0.300122	0	1	0
13	ENSDARG00000074602	mrvi1	-0.0121917	0.154577	0.296002	0	0	0
13	ENSDARG00000041159	si:ch211-63p21.4	0.587126	0.791265	0.290306	0	0	0
13	ENSDARG00000101637	ccnd1	-0.109952	1.14012	0.284626	0	0	0
13	ENSDARG00000004537	kmt2a	0.0200229	0.294177	0.272961	0	0	0
13	ENSDARG00000079216	dpep2	0.0487613	0.655212	0.268398	0	0	0
13	ENSDARG00000045574	lrmp	-0.283186	0.0180391	0.264368	0	0	0
13	ENSDARG00000012555	ak5	-0.193106	0.486826	0.236466	0	0	0
13	ENSDARG00000020656	prkg1a	0.122575	0.72378	0.224642	0	0	0
13	ENSDARG00000075673	arhgap21b	-0.0788164	-0.0543921	0.220888	0	0	0
13	ENSDARG00000070955	hmx3a	-0.11695	0.818253	0.201696	0	0	0
13	ENSDARG00000004696	eefsec	-0.447351	0.0478749	0.181568	0	0	0
13	ENSDARG00000044362	unc119b	-0.951511	-1.38694	0.166742	0	0	0
13	ENSDARG00000038123	myl9a	0.0730038	-0.313956	0.154519	0	0	0
13	ENSDARG00000005586	zbtb20	0.317874	-0.204308	0.144688	0	0	0
13	ENSDARG00000025797	abhd2a	-0.024728	-0.433374	0.132746	0	0	0
13	ENSDARG00000088124	adrb2a	-0.0831374	0.291275	0.0672755	0	0	0
13	ENSDARG00000068621	si:ch211-181d7.3	0.0581465	1.56899	0.0488819	0	0	0
13	ENSDARG00000045415	gnal	-0.180935	-1.57605	0.0261454	0	0	0
13	ENSDARG00000016789	zgc:152891	-0.185085	0.908455	-0.0127766	0	0	0
13	ENSDARG00000055075	svila	0.255389	0.407875	-0.0772771	0	0	0
13	ENSDARG00000036588	mhc1zba	0.0163104	-0.363155	-0.0821906	0	0	0
13	ENSDARG00000021991	erlin1	-0.166079	-0.00771449	-0.098478	0	0	0
13	ENSDARG00000015887	b2ml	-0.0399343	-0.327136	-0.124721	0	0	0
13	ENSDARG00000068760	tnks1bp1	-0.0472747	-0.384584	-0.127315	0	0	0
13	ENSDARG00000070047	rgs4	-0.206633	1.19212	-0.168915	0	0	0
13	ENSDARG00000099465	rnf213a	-0.30973	-0.661898	-0.180177	0	0	0
13	ENSDARG00000031164	tuba8l2	0.272033	-0.109242	-0.214459	0	0	0
13	ENSDARG00000097256	si:ch211-270g19.5	0.120325	0.156833	-0.225541	0	0	0
13	ENSDARG00000079895	ehbp1l1b	0.0995438	-0.361686	-0.284785	0	0	0
13	ENSDARG00000086903	gig2o	-0.0364818	-0.309056	-0.285944	0	0	0
13	ENSDARG00000044016	myo6a	-0.293902	0.150999	-0.288124	0	0	0
13	ENSDARG00000025902	plekhg5a	-0.217345	-0.374196	-0.308585	0	0	0
13	ENSDARG00000073961	si:ch211-160j14.2	-0.295331	0.778356	-0.321265	0	0	0
13	ENSDARG00000105185	snx7	-0.298144	-0.154711	-0.368583	0	0	0
13	ENSDARG00000056228	pld1a	-0.138946	-0.0123176	-0.422199	0	0	0
13	ENSDARG00000087749	ccser2a	0.0291686	-0.311603	-0.510377	0	0	0
13	ENSDARG00000042141	myo6b	-0.213755	0.261456	-0.533863	0	0	0
13	ENSDARG00000039351	ccl19b	-1.1276	-0.735207	-0.542512	0	0	0
13	ENSDARG00000056324	zgc:123295	-0.65031	-0.324439	-0.610622	0	0	0
13	ENSDARG00000077395	si:dkey-81n2.2	-0.126023	0.642129	-0.698897	0	0	0
13	ENSDARG00000090086	rab11bb	-0.0136608	-0.0300125	-0.750593	0	0	0
13	ENSDARG00000033144	psme2	-0.480021	-0.877789	-0.776802	0	0	0
13	ENSDARG00000068763	plcg2	-0.591516	-0.616879	-0.777009	0	0	0
13	ENSDARG00000092520	si:dkey-250k15.10	-0.540574	-0.688683	-0.824561	0	0	0
13	ENSDARG00000041060	lgals9l3	-0.248947	0.0161033	-1.09948	0	0	0
13	ENSDARG00000100972	myh11b	-0.196695	-0.123406	-1.10463	0	0	0
13	ENSDARG00000011581	si:dkey-23k10.5	-0.242942	-0.514294	-1.15606	0	0	0
13	ENSDARG00000089043	ptpn6	-0.651937	-0.406797	-1.17551	0	0	0
13	ENSDARG00000075757	gig2e	0.185423	-0.802025	-1.47075	0	0	0
13	ENSDARG00000093279	si:dkey-11o1.3	-0.209863	-1.66581	-1.57493	0	0	0
13	ENSDARG00000103444	gig2h	-0.375582	-1.16939	-1.79188	0	0	1
13	ENSDARG00000043249	irf1b	-0.500841	-0.105671	-1.85393	0	0	1
13	ENSDARG00000062598	ltc4s	-0.563203	0.486214	-2.82436	0	0	1
13	ENSDARG00000022698	lad1	-0.406358	-0.260687	-3.04825	0	0	1
13	ENSDARG00000098463	gig2g	-0.757749	1.84	-3.40579	0	0	1
13	ENSDARG00000029890	si:dkeyp-86f7.4	-0.0236736	-0.442894	-9.86101	0	0	1
goblet cells
14	ENSDARG00000059308	golt1bb	-0.574816	1.90358	2.97666	0	1	1
14	ENSDARG00000070480	agr2	-0.56627	1.39191	2.30568	0	0	1
14	ENSDARG00000105118	zgc:171566	-0.0584935	2.80797	2.00364	0	1	1
14	ENSDARG00000104721	si:dkey-203a12.9	-0.22897	1.86221	1.78473	0	1	1
14	ENSDARG00000037746	actb1	-0.258125	0.988715	1.70622	0	0	0
14	ENSDARG00000024954	tmed4	-0.235779	1.09475	1.67537	0	0	0
14	ENSDARG00000056600	papss2b	-0.271494	1.36081	1.57126	0	0	0
14	ENSDARG00000044304	prrc1	-0.308641	0.844995	1.39811	0	0	0
14	ENSDARG00000029663	rab1ab	-0.265753	0.775389	1.21806	0	0	0
14	ENSDARG00000017658	gmppb	-0.21034	0.938873	1.17698	0	0	0
14	ENSDARG00000018404	krt18a.1	-0.241173	1.38492	1.16072	0	0	0
14	ENSDARG00000018562	cope	-0.275305	0.513265	1.14726	0	0	0
14	ENSDARG00000002401	gale	-0.726205	0.765404	1.06196	0	0	0
14	ENSDARG00000075718	rpz5	-0.150623	1.58309	1.04214	0	0	0
14	ENSDARG00000056152	fam3c	0.0503708	1.00622	1.00895	0	0	0
14	ENSDARG00000025147	cd63	-0.311219	0.774573	0.965409	0	0	0
14	ENSDARG00000069476	spint2	0.105981	1.0095	0.913963	0	0	0
14	ENSDARG00000038489	b3gnt7	-0.291334	0.578498	0.911916	0	0	0
14	ENSDARG00000014386	galnt6	0.11111	0.490333	0.841339	0	0	0
14	ENSDARG00000005254	kdelr2a	-0.175781	0.699555	0.749519	0	0	0
14	ENSDARG00000006786	copz2	-0.100612	0.555392	0.735184	0	0	0
14	ENSDARG00000054433	yipf6	-0.0613884	0.418824	0.734037	0	0	0
14	ENSDARG00000071021	papss2a	-0.0311842	-0.109782	0.723918	0	0	0
14	ENSDARG00000036335	c1galt1c1	-0.202033	0.545821	0.72168	0	0	0
14	ENSDARG00000095559	si:dkey-246j7.1	0.157789	0.622988	0.639357	0	0	0
14	ENSDARG00000070472	arf5	-0.101971	0.458482	0.609298	0	0	0
14	ENSDARG00000033466	tagln2	-0.221173	0.761639	0.559976	0	0	0
14	ENSDARG00000030957	yipf4	0.0340358	0.503789	0.546166	0	0	0
14	ENSDARG00000052429	syngr2a	-0.105837	0.753812	0.465222	0	0	0
14	ENSDARG00000001804	zgc:112148	-0.109914	0.120593	0.428399	0	0	0
14	ENSDARG00000039892	gnpnat1	-0.387107	0.357194	0.376784	0	0	0
14	ENSDARG00000014556	serpinb1l3	0.10216	-0.365953	0.372549	0	0	0
14	ENSDARG00000037361	kdelr2b	-0.236672	-0.492417	0.335409	0	0	0
14	ENSDARG00000014165	ssr3	0.0257463	-0.241926	0.0658822	0	0	0
14	ENSDARG00000099439	serp1	-0.128649	0.158414	-0.0650392	0	0	0
14	ENSDARG00000040912	kdelr3	0.150825	-0.0473939	-0.312561	0	0	0
14	ENSDARG00000061432	zgc:194330	-1.05703	-0.0412406	-0.590916	0	0	0
14	ENSDARG00000021669	sec61a1	0.245749	-0.582631	-0.791261	0	0	0
14	ENSDARG00000094438	plac8.2	-3.01038	0.274363	-5.40084	0	0	1
ionocytes
15	ENSDARG00000092362	hsp70.2	-1.80851	3.73309	5.70002	0	1	1
15	ENSDARG00000021924	hsp70.3	-2.16398	3.77192	5.59761	0	1	1
15	ENSDARG00000029688	hsp70.1	-1.66891	3.33046	5.27354	0	1	1
15	ENSDARG00000055723	hsp70l	-1.24411	3.48484	4.69199	0	1	1
15	ENSDARG00000024746	hsp90aa1.2	-1.12108	2.74986	3.56965	0	1	1
15	ENSDARG00000051762	CABZ01080568.1	-0.891429	1.76021	3.37345	0	1	1
15	ENSDARG00000103511	zfand2a	-0.169816	0.529962	2.76203	0	0	1
15	ENSDARG00000102937	hspbp1	-0.133344	1.64881	1.75379	0	0	1
15	ENSDARG00000041394	dnajb1b	-0.488348	1.51341	1.68782	0	0	0
15	ENSDARG00000019834	edrf1	-0.276382	1.02249	1.28559	0	0	0
15	ENSDARG00000096721	si:rp71-1c10.11	-0.486914	1.39785	1.12513	0	0	0
15	ENSDARG00000006514	her6	-0.0322734	1.33782	1.03043	0	0	0
15	ENSDARG00000002369	UBB	0.118641	0.137852	0.850173	0	0	0
15	ENSDARG00000039486	bag3	-0.0379794	0.338813	0.811288	0	0	0
15	ENSDARG00000097533	BX571880.1	-0.272468	-0.443502	0.738445	0	0	0
15	ENSDARG00000041623	mt2	-0.651384	0.501048	0.122668	0	0	0
15	ENSDARG00000042293	ca4b	0.538966	-0.313942	0.0169234	0	0	0
15	ENSDARG00000030440	rsrp1	-0.228262	0.633707	0.00832872	0	0	0
15	ENSDARG00000104301	zgc:193726	0.324279	0.00515238	-0.204154	0	0	0
15	ENSDARG00000104568	BX571715.1	-0.234693	0.349063	-0.822729	0	0	0
15	ENSDARG00000010658	insig1	-0.00439493	-1.07866	-1.43959	0	0	0
enterocytes (segment 1 precursors?)
16	ENSDARG00000094154	hist2h3c	-0.491478	0.306212	3.66651	0	0	1
16	ENSDARG00000103907	sgo1	-0.918614	1.79188	2.72276	0	1	1
16	ENSDARG00000086112	si:ch211-266i6.3	-0.700487	2.21762	2.69278	0	1	1
16	ENSDARG00000106529	dut	-0.281137	0.883311	2.67131	0	0	1
16	ENSDARG00000102594	zgc:194627	-0.850519	1.45849	2.52802	0	0	1
16	ENSDARG00000097691	pclaf	-0.705904	1.32913	2.48561	0	0	1
16	ENSDARG00000063385	cenpe	-1.10408	2.08597	2.4074	0	1	1
16	ENSDARG00000083189	arhgap19	-0.358354	2.17058	2.39264	0	1	1
16	ENSDARG00000078433	spc25	-0.307848	2.19589	2.36444	0	1	1
16	ENSDARG00000075621	birc5a	-0.81294	2.26102	2.35871	0	1	1
16	ENSDARG00000051923	ccnb1	-0.964063	1.93482	2.31817	0	1	1
16	ENSDARG00000024488	top2a	-0.84321	1.62235	2.30307	0	0	1
16	ENSDARG00000100019	arhgap11a	-1.14626	2.16526	2.26449	0	1	1
16	ENSDARG00000100573	ckap2l	-0.7337	1.83752	2.25251	0	1	1
16	ENSDARG00000037640	aurkb	-0.85964	1.78416	2.24944	0	1	1
16	ENSDARG00000089291	cenpx	-0.873725	1.0842	2.24826	0	0	1
16	ENSDARG00000034624	nuf2	-1.07323	1.68246	2.24242	0	0	1
16	ENSDARG00000099194	CABZ01058261.1	-0.857488	1.71233	2.22827	0	0	1
16	ENSDARG00000045167	dlgap5	-0.725769	1.67191	2.2272	0	0	1
16	ENSDARG00000058471	plk1	-0.842916	1.90399	2.18599	0	1	1
16	ENSDARG00000043137	cdca8	-0.883608	1.71441	2.15887	0	0	1
16	ENSDARG00000070109	ncapg	-0.80486	1.8536	2.13357	0	1	1
16	ENSDARG00000077822	si:dkey-6i22.5	-0.979987	0.698137	2.12002	0	0	1
16	ENSDARG00000007971	cks1b	-1.06873	2.17176	2.09483	0	1	1
16	ENSDARG00000091150	mki67	-0.863399	1.10647	2.09359	0	0	1
16	ENSDARG00000103996	spdl1	-0.916924	1.80039	2.06207	0	1	1
16	ENSDARG00000071410	cks2	-0.86054	1.37639	2.05426	0	0	1
16	ENSDARG00000040110	kif20bb	-0.947856	1.50501	2.0318	0	0	1
16	ENSDARG00000076228	kif2c	-0.836989	1.63801	2.02792	0	0	1
16	ENSDARG00000052103	dtymk	-0.73106	0.615144	1.9923	0	0	1
16	ENSDARG00000116654	si:dkey-261m9.6	-0.823806	-1.26512	1.98782	0	0	1
16	ENSDARG00000005274	rad52	-0.297604	1.98004	1.96264	0	1	1
16	ENSDARG00000062187	kif14	-0.429955	1.53051	1.95701	0	0	1
16	ENSDARG00000109370	hist1h2ba	1.20402	0.10255	1.91507	0	0	1
16	ENSDARG00000062152	chaf1a	-0.673926	1.27269	1.88948	0	0	1
16	ENSDARG00000053950	lin37	-0.133142	1.29083	1.7502	0	0	1
16	ENSDARG00000102483	numa1	-0.510403	1.88861	1.57979	0	1	0
16	ENSDARG00000033012	pcnt	-0.219742	0.655133	1.50697	0	0	0
16	ENSDARG00000105350	si:ch1073-153i20.4	-1.03273	2.16473	1.47731	0	0	0
16	ENSDARG00000004169	stmn1a	-0.667104	1.24126	1.42304	0	0	0
16	ENSDARG00000099572	hmgn2	-0.395895	1.34888	1.3751	0	0	0
16	ENSDARG00000038386	ascl1a	-0.579492	1.04202	1.36738	0	0	0
16	ENSDARG00000071670	tma7	-0.361874	0.802154	1.12085	0	0	0
16	ENSDARG00000070019	taf15	-0.436754	0.816335	1.0195	0	0	0
16	ENSDARG00000113969	supt4h1	-0.224313	0.876367	0.98938	0	0	0
16	ENSDARG00000097102	si:ch73-281n10.2	-0.330788	0.562102	0.966081	0	0	0
16	ENSDARG00000029722	hmgb2a	0.0239029	1.04135	0.964483	0	0	0
16	ENSDARG00000053990	hmgb2b	-0.432191	1.16545	0.935216	0	0	0
16	ENSDARG00000100279	CU457819.1	-0.0712385	1.56088	0.91048	0	0	0
16	ENSDARG00000094204	elp1	-0.122062	0.322455	0.669089	0	0	0
16	ENSDARG00000058479	zgc:110425	-0.895761	1.50796	0.00697582	0	0	0
enterocytes (segment 2)
17	ENSDARG00000044098	egr2a	-0.166032	0.654129	3.00229	0	0	1
17	ENSDARG00000059651	cidec	-0.0100343	0.596217	1.48598	0	0	0
17	ENSDARG00000053467	gtpbp1	-0.399994	2.56508	1.41183	0	1	0
17	ENSDARG00000022295	hnf1bb	-0.248682	0.416439	1.20862	0	0	0
17	ENSDARG00000055647	ftr82	-0.0610116	0.100387	0.757743	0	0	0
17	ENSDARG00000002494	itgb6	-0.1515	0.31882	0.743009	0	0	0
17	ENSDARG00000070346	hoxc8a	0.066381	1.21691	0.737628	0	0	0
17	ENSDARG00000044769	kctd13	-0.14691	0.164415	0.672738	0	0	0
17	ENSDARG00000053625	anxa2b	-0.182015	-0.184525	0.399724	0	0	0
17	ENSDARG00000063538	kalrnb	0.0977471	-0.299998	0.344071	0	0	0
17	ENSDARG00000035869	azin1b	0.0500322	0.0919641	0.204122	0	0	0
17	ENSDARG00000032849	ndrg1a	-0.128385	1.21904	0.151601	0	0	0
17	ENSDARG00000056226	creb3l3a	0.00522037	-0.207638	-0.10176	0	0	0
17	ENSDARG00000013721	g6pca.2	-0.229314	0.113479	-0.261672	0	0	0
17	ENSDARG00000061274	lss	-0.291631	-0.503014	-0.349302	0	0	0
17	ENSDARG00000062096	pm20d1.2	0.206756	-0.172827	-0.40998	0	0	0
17	ENSDARG00000039150	lgmn	-0.377379	0.0720678	-0.527518	0	0	0
17	ENSDARG00000014916	slc10a2	-0.0672715	-1.13825	-0.571791	0	0	0
17	ENSDARG00000074852	myo15b	0.0414633	-0.368443	-0.657541	0	0	0
17	ENSDARG00000043009	fam43a	0.0395044	0.165257	-0.672426	0	0	0
17	ENSDARG00000096359	eppk1	0.221083	-0.433889	-0.754356	0	0	0
17	ENSDARG00000068181	dpep1	-0.226506	-0.630089	-0.876816	0	0	0
17	ENSDARG00000041797	cx28.9	0.274134	-0.759999	-0.913793	0	0	0
17	ENSDARG00000089362	grn1	-0.676368	-0.740264	-0.945074	0	0	0
17	ENSDARG00000009653	lhfpl2a	-0.107984	-1.20438	-1.08338	0	0	0
17	ENSDARG00000105714	CABZ01083442.1	-0.0847756	-0.844807	-1.14199	0	0	0
17	ENSDARG00000002210	stk25a	-0.322193	0.0875228	-1.36894	0	0	0
17	ENSDARG00000097193	si:dkey-28n18.9	-0.441456	-0.784469	-1.43207	0	0	0
17	ENSDARG00000013730	slc4a4a	-0.436511	0.391047	-1.44382	0	0	0
17	ENSDARG00000000212	krt97	0.105167	-0.875662	-1.68921	0	0	0
17	ENSDARG00000031761	dab2	-0.299929	-0.485072	-1.85883	0	0	1
17	ENSDARG00000103266	ogal	-0.214991	-0.947713	-1.98321	0	0	1
17	ENSDARG00000044566	fabp6	0.172855	-1.38538	-2.00464	0	0	1
17	ENSDARG00000002986	gda	0.00842745	-1.14088	-2.03367	0	0	1
17	ENSDARG00000056781	zanl	0.0621467	-0.939106	-2.18781	0	0	1
17	ENSDARG00000079647	muc13b	-0.406313	-0.303043	-2.56644	0	0	1
17	ENSDARG00000007040	tmigd1	0.047253	-1.809	-2.8726	0	1	1
17	ENSDARG00000098805	vwa11	-0.362488	-0.891876	-3.22415	0	0	1
17	ENSDARG00000104047	si:ch211-262i1.3	-0.271497	-0.491271	-3.7156	0	0	1
17	ENSDARG00000101051	ctsbb	-0.40843	-1.6679	-4.66355	0	0	1
17	ENSDARG00000003902	ctsl.1	-0.385205	-0.978479	-4.67957	0	0	1
17	ENSDARG00000005704	eps8l3b	-0.395116	0.090592	-5.50786	0	0	1
17	ENSDARG00000097683	sptbn5	-0.874103	-1.58325	-6.05814	0	0	1
17	ENSDARG00000007906	lrp2b	-0.982026	-1.34901	-6.58142	0	0	1
17	ENSDARG00000096739	si:dkey-219e21.2	-0.151641	-0.638047	-6.7803	0	0	1
17	ENSDARG00000105522	si:ch211-196f2.3	-0.0917638	-0.466631	-8.52538	0	0	1
leukocytes
18	ENSDARG00000008541	chia.4	-0.452739	0.721456	2.27147	0	0	1
18	ENSDARG00000033516	efr3ba	0.00483071	1.11738	2.21007	0	0	1
18	ENSDARG00000103466	ccl35.1	-0.562922	0.828937	2.14997	0	0	1
18	ENSDARG00000099980	bpifcl	-0.422041	-0.00330343	2.11867	0	0	1
18	ENSDARG00000103319	si:ch73-359m17.7	-0.232039	1.32592	1.99284	0	0	1
18	ENSDARG00000056008	atp5mc1	-0.496004	0.885598	1.8666	0	0	1
18	ENSDARG00000073970	mctp2b	-0.132832	0.0335361	1.77364	0	0	1
18	ENSDARG00000103207	rab11fip4b	-0.0177084	1.48979	1.61297	0	0	0
18	ENSDARG00000077559	LO017815.1	-0.0463284	1.24446	1.54616	0	0	0
18	ENSDARG00000091902	b3gnt2b	-0.0032366	0.756436	1.51268	0	0	0
18	ENSDARG00000045898	si:ch211-152c2.3	-0.0246148	1.06014	1.48619	0	0	0
18	ENSDARG00000044694	fybb	-0.105032	0.52105	1.42085	0	0	0
18	ENSDARG00000062590	pleca	0.099806	0.526244	1.40433	0	0	0
18	ENSDARG00000005355	larp6a	-0.069311	0.996971	1.39019	0	0	0
18	ENSDARG00000041570	mrpl39	-0.247997	0.848069	1.38466	0	0	0
18	ENSDARG00000016505	apbb1ip	-0.0239124	0.616387	1.35231	0	0	0
18	ENSDARG00000086762	gsdmea	-0.933338	2.10866	1.34591	0	1	0
18	ENSDARG00000058348	scinlb	-0.223872	0.491941	1.34586	0	0	0
18	ENSDARG00000074656	ctss2.1	-0.318111	0.816439	1.30207	0	0	0
18	ENSDARG00000036179	myo1ea	0.111192	0.525083	1.29234	0	0	0
18	ENSDARG00000027590	2020-09-02	-0.220873	1.17184	1.28285	0	0	0
18	ENSDARG00000067672	card9	-0.932001	1.51256	1.28061	0	0	0
18	ENSDARG00000103966	si:ch211-156b7.5	-0.601953	0.444044	1.2403	0	0	0
18	ENSDARG00000099332	ly6m5	-0.0514749	1.65972	1.22572	0	0	0
18	ENSDARG00000055290	mpeg1.1	-0.305384	0.540643	1.2202	0	0	0
18	ENSDARG00000023648	idh3g	-0.16873	0.895929	1.20901	0	0	0
18	ENSDARG00000033437	rps6ka1	-0.137956	0.0528972	1.20877	0	0	0
18	ENSDARG00000056615	cybb	-0.675619	1.49427	1.19146	0	0	0
18	ENSDARG00000032372	ccdc180	-0.925048	1.18438	1.18581	0	0	0
18	ENSDARG00000045928	psma4	-0.288589	0.236973	1.18339	0	0	0
18	ENSDARG00000002240	psmb6	-0.305819	0.560756	1.1793	0	0	0
18	ENSDARG00000041959	cxcr4b	-0.0763242	0.793133	1.1761	0	0	0
18	ENSDARG00000057882	arpc3	-0.229704	0.816401	1.17319	0	0	0
18	ENSDARG00000037506	prps1b	-0.293575	0.948882	1.16249	0	0	0
18	ENSDARG00000046143	prkab1b	-0.126829	0.666004	1.16141	0	0	0
18	ENSDARG00000060445	elp6	-0.117455	0.85667	1.12745	0	0	0
18	ENSDARG00000018283	cyba	-0.432424	0.984868	1.11562	0	0	0
18	ENSDARG00000069624	mrps18c	-0.337337	0.933067	1.11222	0	0	0
18	ENSDARG00000017274	opn1sw2	0.148788	0.939417	1.09605	0	0	0
18	ENSDARG00000104031	mrpl33	-0.211467	0.969703	1.08728	0	0	0
18	ENSDARG00000019062	arpc5b	-0.141925	0.911514	1.08369	0	0	0
18	ENSDARG00000076618	tm2d3	-0.16526	0.54049	1.06889	0	0	0
18	ENSDARG00000009534	wls	0.215863	1.22244	1.06802	0	0	0
18	ENSDARG00000092889	zgc:194246	0.393722	1.07077	1.06416	0	0	0
18	ENSDARG00000002790	ap2m1a	-0.18774	0.740594	1.0322	0	0	0
18	ENSDARG00000067797	spi1a	-0.653112	1.10834	1.02298	0	0	0
18	ENSDARG00000014490	tac1	-0.0221032	0.246562	1.00739	0	0	0
18	ENSDARG00000023188	lcp1	-0.515293	0.569893	0.996136	0	0	0
18	ENSDARG00000030716	ing4	-0.00889282	1.1712	0.988312	0	0	0
18	ENSDARG00000028618	krt18b	0.053827	1.19788	0.988095	0	0	0
18	ENSDARG00000071084	wipf1b	-0.1461	0.860764	0.980438	0	0	0
18	ENSDARG00000013335	anxa6	0.178894	0.881146	0.958297	0	0	0
18	ENSDARG00000039265	arhgap4a	-0.258864	0.70504	0.942317	0	0	0
18	ENSDARG00000087438	spi2	-0.71987	0.391142	0.932048	0	0	0
18	ENSDARG00000068650	fam214b	0.108179	0.798166	0.931939	0	0	0
18	ENSDARG00000025859	lmf2b	-0.350312	-0.0838951	0.930768	0	0	0
18	ENSDARG00000094277	mrpl44	-0.106879	0.779075	0.929401	0	0	0
18	ENSDARG00000074967	zgc:162698	-0.170829	0.802074	0.920996	0	0	0
18	ENSDARG00000054063	arpc4	-0.192164	0.873791	0.911991	0	0	0
18	ENSDARG00000005891	cyb5r3	-0.113594	0.423967	0.89785	0	0	0
18	ENSDARG00000056331	ahcyl1	-0.234054	0.608278	0.896422	0	0	0
18	ENSDARG00000103994	ppiab	-0.0559309	0.306851	0.878337	0	0	0
18	ENSDARG00000000690	sypl2b	-0.0727903	1.81808	0.877898	0	1	0
18	ENSDARG00000058893	nhej1	-0.214433	0.593861	0.875961	0	0	0
18	ENSDARG00000060366	slc12a9	-0.109448	1.15874	0.869712	0	0	0
18	ENSDARG00000023578	lpp	0.0800958	0.32578	0.860479	0	0	0
18	ENSDARG00000006370	atp6v1h	-0.384924	0.679566	0.855227	0	0	0
18	ENSDARG00000002877	reps1	0.000868596	0.830743	0.825622	0	0	0
18	ENSDARG00000071251	ppp1r18	-0.496258	0.843382	0.825364	0	0	0
18	ENSDARG00000021521	rgs14a	-0.393746	1.4218	0.823997	0	0	0
18	ENSDARG00000088283	si:ch73-248e21.5	-0.371797	0.969895	0.82032	0	0	0
18	ENSDARG00000036675	hnrnpa1b	-0.194924	0.604677	0.81141	0	0	0
18	ENSDARG00000014898	ncbp2	-0.311922	0.762994	0.810762	0	0	0
18	ENSDARG00000026072	pdcd5	-0.0631576	0.695658	0.802806	0	0	0
18	ENSDARG00000069114	unc93b1	0.144834	0.348961	0.795259	0	0	0
18	ENSDARG00000017504	si:ch211-1o7.3	-0.185086	-0.134193	0.788033	0	0	0
18	ENSDARG00000019033	tmem59	-0.0716251	0.462072	0.779961	0	0	0
18	ENSDARG00000067566	sftpbb	-0.324308	0.802369	0.778231	0	0	0
18	ENSDARG00000070826	bpgm	0.111539	0.805053	0.764676	0	0	0
18	ENSDARG00000060860	pstpip1a	-0.770362	0.989238	0.762624	0	0	0
18	ENSDARG00000078363	mcoln3a	-0.15352	2.24156	0.761686	0	1	0
18	ENSDARG00000058038	eml3	0.0376028	0.945341	0.749327	0	0	0
18	ENSDARG00000103483	litaf	-0.220296	1.02331	0.74543	0	0	0
18	ENSDARG00000089838	si:dkey-262k9.4	-0.133574	0.881183	0.732189	0	0	0
18	ENSDARG00000077026	si:dkey-94e7.1	-0.651983	0.81287	0.731657	0	0	0
18	ENSDARG00000099672	capgb	0.162254	1.23891	0.730876	0	0	0
18	ENSDARG00000101309	si:ch73-100l22.3	-0.164695	0.632147	0.730638	0	0	0
18	ENSDARG00000068233	zgc:64051	-0.5074	0.90049	0.717768	0	0	0
18	ENSDARG00000013575	rfx2	0.124195	0.597085	0.702955	0	0	0
18	ENSDARG00000027063	arpc1b	-0.387307	0.775301	0.69953	0	0	0
18	ENSDARG00000044241	dram2b	-0.211515	0.511171	0.691158	0	0	0
18	ENSDARG00000078430	tiam1a	0.00427013	0.715461	0.681746	0	0	0
18	ENSDARG00000003373	commd2	-0.307832	0.384729	0.680561	0	0	0
18	ENSDARG00000027930	naprt	-0.0965784	0.126455	0.675589	0	0	0
18	ENSDARG00000100383	il10ra	-0.51944	0.456841	0.67266	0	0	0
18	ENSDARG00000001498	skap1	-0.0447556	-0.475504	0.672393	0	0	0
18	ENSDARG00000091813	si:dkey-21a6.5	-0.569554	0.136263	0.67038	0	0	0
18	ENSDARG00000070601	RASSF5	-0.271084	0.926016	0.666803	0	0	0
18	ENSDARG00000033735	ncf1	-0.353145	0.358121	0.659285	0	0	0
18	ENSDARG00000103984	cyth4b	-0.418065	1.13385	0.652952	0	0	0
18	ENSDARG00000099281	si:dkey-112e7.2	0.0845026	0.265229	0.645894	0	0	0
18	ENSDARG00000002131	celf2	0.0814826	0.984844	0.642886	0	0	0
18	ENSDARG00000015807	rab22a	-0.0157141	0.907532	0.638597	0	0	0
18	ENSDARG00000094025	si:dkey-237j10.2	-0.236955	0.511316	0.637763	0	0	0
18	ENSDARG00000101785	laptm5	-0.354417	0.958201	0.607742	0	0	0
18	ENSDARG00000055955	lcp2a	-0.453252	0.261183	0.605629	0	0	0
18	ENSDARG00000044540	fkbp2	-0.269992	0.0445723	0.601891	0	0	0
18	ENSDARG00000103852	pigrl4.2	-0.844691	0.8796	0.601561	0	0	0
18	ENSDARG00000056204	zgc:113436	-0.195993	0.451552	0.600659	0	0	0
18	ENSDARG00000013771	ctss2.2	-0.338016	0.491576	0.596664	0	0	0
18	ENSDARG00000076914	lacc1	-0.736776	1.98538	0.573762	0	1	0
18	ENSDARG00000100529	sh3bp5a	-0.0582265	0.942359	0.567307	0	0	0
18	ENSDARG00000105592	CR936442.1	-0.0542755	-1.4733	0.564269	0	0	0
18	ENSDARG00000037589	gid8b	-0.0549994	0.550404	0.556773	0	0	0
18	ENSDARG00000053152	pcmtd1	-0.103683	0.00706226	0.554786	0	0	0
18	ENSDARG00000016774	plekho2	-0.122027	0.422716	0.548212	0	0	0
18	ENSDARG00000075853	sh3kbp1	-0.42935	0.824307	0.543392	0	0	0
18	ENSDARG00000067711	parvg	-0.423511	0.858429	0.538289	0	0	0
18	ENSDARG00000093750	cd180	-0.675753	0.679271	0.536545	0	0	0
18	ENSDARG00000034956	myclb	0.0274679	0.00592579	0.53471	0	0	0
18	ENSDARG00000076861	tmem79b	0.0327506	0.179448	0.531166	0	0	0
18	ENSDARG00000089383	il1fma	-0.712074	0.632263	0.526407	0	0	0
18	ENSDARG00000010317	gpr183a	0.0360454	0.852563	0.52404	0	0	0
18	ENSDARG00000020929	fam49ba	-0.0645909	0.657896	0.523407	0	0	0
18	ENSDARG00000019081	DHDH	0.221936	-0.412598	0.523382	0	0	0
18	ENSDARG00000070059	si:ch211-262i1.5	-0.523843	0.410189	0.517872	0	0	0
18	ENSDARG00000116649	ube2e1	-0.107181	0.694436	0.509705	0	0	0
18	ENSDARG00000034427	jpt2	0.0164161	0.0171871	0.504923	0	0	0
18	ENSDARG00000067795	ifngr2	-0.328827	0.600763	0.504674	0	0	0
18	ENSDARG00000055349	pknox2	0.184972	0.91364	0.479014	0	0	0
18	ENSDARG00000056281	cyb561a3a	-0.131771	0.364246	0.46279	0	0	0
18	ENSDARG00000035420	ophn1	-0.173386	0.449818	0.46175	0	0	0
18	ENSDARG00000090767	si:ch211-136m16.8	-0.102654	0.914106	0.456179	0	0	0
18	ENSDARG00000051986	ndufs8a	-0.19387	0.696613	0.445303	0	0	0
18	ENSDARG00000012729	hcls1	-0.137942	0.55791	0.44071	0	0	0
18	ENSDARG00000095830	serpinb1l1	-0.0162735	1.13738	0.43763	0	0	0
18	ENSDARG00000055186	ccr9a	0.0254684	-0.237317	0.430101	0	0	0
18	ENSDARG00000000906	skap2	-0.1454	0.29684	0.428893	0	0	0
18	ENSDARG00000013044	ndufv2	-0.0232402	0.224996	0.423676	0	0	0
18	ENSDARG00000029036	rab32a	-0.266173	0.301447	0.415939	0	0	0
18	ENSDARG00000092373	BX005340.1	-1.05342	0.229903	0.412067	0	0	0
18	ENSDARG00000035018	thy1	0.29758	1.24085	0.40598	0	0	0
18	ENSDARG00000004378	yrk	-0.150876	0.994904	0.404598	0	0	0
18	ENSDARG00000078285	pik3ap1	-0.365996	0.691121	0.402192	0	0	0
18	ENSDARG00000102741	sumo2b	-0.0054784	0.683645	0.397169	0	0	0
18	ENSDARG00000020693	sesn1	0.203481	0.187119	0.386356	0	0	0
18	ENSDARG00000041505	itm2bb	-0.119104	0.150173	0.380608	0	0	0
18	ENSDARG00000030938	fermt3b	-0.259099	0.494299	0.374118	0	0	0
18	ENSDARG00000004034	arhgdig	-0.199808	0.460842	0.34442	0	0	0
18	ENSDARG00000103900	sept9b	-0.0631319	0.893471	0.339812	0	0	0
18	ENSDARG00000075592	tnfaip8l2a	-0.217751	0.696344	0.338686	0	0	0
18	ENSDARG00000076090	jakmip1	0.236232	0.531045	0.338552	0	0	0
18	ENSDARG00000075818	dok2	-0.411806	0.678545	0.338105	0	0	0
18	ENSDARG00000052842	ppifb	0.0190565	0.121689	0.328251	0	0	0
18	ENSDARG00000034817	asah1b	-0.292477	0.109048	0.326355	0	0	0
18	ENSDARG00000100649	tlr1	-0.0594366	0.148474	0.32345	0	0	0
18	ENSDARG00000096331	si:ch73-248e21.7	-0.419802	0.955371	0.315127	0	0	0
18	ENSDARG00000007385	cct7	0.0134104	0.465253	0.307468	0	0	0
18	ENSDARG00000108038	CABZ01109481.1	-0.151039	0.179528	0.303961	0	0	0
18	ENSDARG00000040930	deptor	-0.262443	-0.0767096	0.29496	0	0	0
18	ENSDARG00000007438	ube2ib	-0.0698835	0.403335	0.288625	0	0	0
18	ENSDARG00000036785	si:ch211-226m16.2	-0.122019	0.426006	0.288096	0	0	0
18	ENSDARG00000071414	cybc1	-0.420002	0.997311	0.278569	0	0	0
18	ENSDARG00000010423	npsn	-0.225812	2.16743	0.2737	0	1	0
18	ENSDARG00000010384	lpar5a	-0.604562	0.908079	0.269391	0	0	0
18	ENSDARG00000070404	inka1b	0.00734586	0.929616	0.268074	0	0	0
18	ENSDARG00000056233	zgc:110591	-0.0887448	0.507146	0.26308	0	0	0
18	ENSDARG00000006672	fam49a	-0.0574384	0.405067	0.261717	0	0	0
18	ENSDARG00000037870	actb2	0.306457	-0.0477269	0.2462	0	0	0
18	ENSDARG00000039535	dapp1	-0.406866	0.413659	0.229663	0	0	0
18	ENSDARG00000054610	coro1a	-0.413007	0.37347	0.201748	0	0	0
18	ENSDARG00000054842	hsd17b14	-0.333983	0.76948	0.15124	0	0	0
18	ENSDARG00000026350	wasb	0.0352078	0.309589	0.127533	0	0	0
18	ENSDARG00000036637	arl11	0.2078	1.61743	0.118964	0	0	0
18	ENSDARG00000015149	wasa	-0.136597	0.154218	0.111196	0	0	0
18	ENSDARG00000091609	spink4	0.271239	-0.446304	0.0927073	0	0	0
18	ENSDARG00000011459	gsna	-0.298816	0.593512	0.0715363	0	0	0
18	ENSDARG00000058389	ccl19a.1	-0.435871	0.780164	0.0551773	0	0	0
18	ENSDARG00000036106	rgs18	-0.451023	0.293899	0.0493928	0	0	0
18	ENSDARG00000038010	rac2	-0.229331	0.139138	0.0303907	0	0	0
18	ENSDARG00000104197	ptpn22	-0.12932	1.22201	0.0281362	0	0	0
18	ENSDARG00000041665	mkrn1	0.0868057	0.259925	-0.0195245	0	0	0
18	ENSDARG00000099420	nme2b.2	0.380852	1.25958	-0.0287178	0	0	0
18	ENSDARG00000076229	mrtfab	0.214305	0.0575972	-0.0340752	0	0	0
18	ENSDARG00000067630	zgc:154075	-0.181167	0.582976	-0.0816371	0	0	0
18	ENSDARG00000094996	sult1st9	-0.46996	1.73393	-0.0848005	0	0	0
18	ENSDARG00000104181	tmsb1	0.0158675	-0.265688	-0.125667	0	0	0
18	ENSDARG00000068432	si:dkey-56m19.5	0.016504	0.684563	-0.146386	0	0	0
18	ENSDARG00000052701	smpd2b	-0.38739	-0.0274822	-0.200049	0	0	0
18	ENSDARG00000088641	grn2	-0.49884	1.44483	-0.218834	0	0	0
18	ENSDARG00000018145	mid1ip1l	0.021557	-0.0484466	-0.271373	0	0	0
18	ENSDARG00000063682	fhod3a	0.13991	1.20638	-0.271517	0	0	0
18	ENSDARG00000012435	spic	-0.945751	0.413179	-0.317025	0	0	0
18	ENSDARG00000099690	vaspa	-0.470338	0.10637	-0.317677	0	0	0
18	ENSDARG00000061762	trim108	0.441599	0.21331	-0.34939	0	0	0
18	ENSDARG00000099342	crfb15	-0.699856	-0.256063	-0.393415	0	0	0
18	ENSDARG00000088439	gm2a	-0.141748	-0.0383435	-0.442186	0	0	0
18	ENSDARG00000011449	fes	-0.367065	-0.23437	-0.531189	0	0	0
18	ENSDARG00000009336	aif1l	-0.52946	1.30988	-0.614394	0	0	0
18	ENSDARG00000004979	elovl5	-0.251822	0.511819	-0.618112	0	0	0
18	ENSDARG00000009430	tmem30c	-0.156996	0.104482	-0.665827	0	0	0
18	ENSDARG00000030269	grtp1b	-0.24669	-0.263493	-0.72606	0	0	0
18	ENSDARG00000026548	cyp2u1	0.0549449	-0.501064	-0.82972	0	0	0
18	ENSDARG00000009087	cd74a	-0.138294	-1.13599	-1.03917	0	0	0
18	ENSDARG00000104398	si:ch73-343g19.4	-1.26751	-0.936148	-1.10677	0	0	0
18	ENSDARG00000117364	CU928222.3	-1.01196	0.0262735	-1.1136	0	0	0
18	ENSDARG00000039439	il22ra2	-1.55451	0.729461	-1.12574	0	0	0
18	ENSDARG00000079166	ace	0.0259657	0.0310673	-1.43261	0	0	0
18	ENSDARG00000102076	spink2.1	0.204117	0.0460217	-1.4951	0	0	0
18	ENSDARG00000054542	il12bb	-0.977238	-0.256893	-1.66173	0	0	0
18	ENSDARG00000076981	zgc:198329	-0.636024	-0.0733386	-2.03626	0	0	1
18	ENSDARG00000102555	si:dkey-33i11.9	-0.249867	-0.789537	-2.82968	0	0	1
18	ENSDARG00000104256	bco1	0.0352625	-0.748136	-2.84659	0	0	1
mesenchymal cells
19	ENSDARG00000015355	fosl1a	-0.620148	2.77628	3.75379	0	1	1
19	ENSDARG00000104773	junbb	-0.166146	1.11687	3.4032	0	0	1
19	ENSDARG00000031683	fosab	0.606501	-0.0510552	3.34848	0	0	1
19	ENSDARG00000055751	fosb	0.770093	0.195999	2.59624	0	0	1
19	ENSDARG00000056795	serpine1	-0.791746	1.89227	2.56039	0	1	1
19	ENSDARG00000099195	ier2a	0.286002	0.630644	2.36436	0	0	1
19	ENSDARG00000022303	higd1a	-0.00961535	1.62972	2.35852	0	0	1
19	ENSDARG00000073786	cmbl	0.581366	1.03526	2.33948	0	0	1
19	ENSDARG00000075261	timp2b	-0.871452	2.81158	2.15345	0	1	1
19	ENSDARG00000037804	phlda3	-0.336964	2.24422	2.1038	0	1	1
19	ENSDARG00000012405	col1a1a	0.177218	1.19348	1.75687	0	0	1
19	ENSDARG00000103129	nid1b	0.189281	1.10162	1.58929	0	0	0
19	ENSDARG00000101135	si:dkey-85k7.7	0.543553	1.39494	1.58112	0	0	0
19	ENSDARG00000038941	ppp1r1c	0.0424676	2.13994	1.55214	0	1	0
19	ENSDARG00000055575	pcolce2b	0.379351	1.25265	1.53552	0	0	0
19	ENSDARG00000013430	bhmt	-0.154823	0.885437	1.48578	0	0	0
19	ENSDARG00000035809	col1a1b	0.136389	0.758924	1.46613	0	0	0
19	ENSDARG00000018856	dclk1a	-0.372743	1.47504	1.45956	0	0	0
19	ENSDARG00000059367	mfap2	0.144959	1.0152	1.4326	0	0	0
19	ENSDARG00000005673	f3b	-0.0740018	0.957925	1.37509	0	0	0
19	ENSDARG00000026165	col11a1a	0.249244	1.84832	1.36494	0	1	0
19	ENSDARG00000087196	fibinb	0.0119297	1.91561	1.33307	0	1	0
19	ENSDARG00000032324	epb41l5	-0.143027	0.878367	1.31199	0	0	0
19	ENSDARG00000036036	mdka	-0.142008	1.31354	1.30548	0	0	0
19	ENSDARG00000020007	col1a2	0.162874	0.941386	1.29599	0	0	0
19	ENSDARG00000012422	col11a2	0.135482	0.61279	1.29452	0	0	0
19	ENSDARG00000077811	sox11a	-0.0250453	1.4471	1.16611	0	0	0
19	ENSDARG00000004782	fgfr3	0.188985	0.944657	1.15942	0	0	0
19	ENSDARG00000037845	col9a3	-0.233226	4.27347	1.15644	0	1	0
19	ENSDARG00000014646	aoc2	-0.155745	0.769985	1.13889	0	0	0
19	ENSDARG00000007241	mycb	-0.892684	0.457186	1.13728	0	0	0
19	ENSDARG00000058128	msna	-0.260008	1.22183	1.12071	0	0	0
19	ENSDARG00000000002	ccdc80	0.0793567	0.928412	1.11909	0	0	0
19	ENSDARG00000032617	fgfrl1a	0.183489	1.13089	1.09782	0	0	0
19	ENSDARG00000039576	fstl1b	0.0396249	1.24267	1.06781	0	0	0
19	ENSDARG00000071586	tgfbi	-0.0549304	1.23369	1.05858	0	0	0
19	ENSDARG00000051748	ccnd2a	-0.130964	1.25563	1.04018	0	0	0
19	ENSDARG00000034268	slit3	0.0784407	0.434662	1.01908	0	0	0
19	ENSDARG00000052057	pcolceb	-0.097938	2.23207	1.00752	0	1	0
19	ENSDARG00000031981	pcbd1	-0.114438	0.860765	0.987987	0	0	0
19	ENSDARG00000011973	slc35d1a	0.0741372	0.880831	0.977547	0	0	0
19	ENSDARG00000035521	sfrp1a	-0.166147	0.827304	0.974001	0	0	0
19	ENSDARG00000079302	and2	0.28939	1.70623	0.968348	0	0	0
19	ENSDARG00000012593	col5a1	0.142549	1.04798	0.966626	0	0	0
19	ENSDARG00000102340	ptn	0.137611	1.28408	0.922241	0	0	0
19	ENSDARG00000043066	nog2	0.0900534	0.632196	0.902292	0	0	0
19	ENSDARG00000000666	creg2	0.0433469	0.69287	0.894902	0	0	0
19	ENSDARG00000019601	col12a1b	-0.0499189	1.04316	0.894443	0	0	0
19	ENSDARG00000031678	col5a2a	0.00433587	1.08568	0.886262	0	0	0
19	ENSDARG00000040944	ntd5	0.247567	1.69824	0.885472	0	0	0
19	ENSDARG00000013976	anxa13	-0.205359	1.20691	0.881505	0	0	0
19	ENSDARG00000074908	col6a1	0.0570274	0.364763	0.879615	0	0	0
19	ENSDARG00000036080	cd81a	0.0352538	1.14115	0.853874	0	0	0
19	ENSDARG00000055053	itih1	0.239376	3.49014	0.851973	0	1	0
19	ENSDARG00000003449	pde10a	0.0978344	1.17685	0.849868	0	0	0
19	ENSDARG00000012066	dcn	0.323664	1.10524	0.848418	0	0	0
19	ENSDARG00000100133	cnmd	-0.189537	3.65369	0.840014	0	1	0
19	ENSDARG00000056427	auts2a	0.0114134	0.710448	0.834869	0	0	0
19	ENSDARG00000036893	f13a1b	0.269761	1.99079	0.814973	0	1	0
19	ENSDARG00000105562	si:dkey-23i12.7	-1.37826	1.81079	0.807692	0	1	0
19	ENSDARG00000053864	elmsan1b	-0.0525689	0.909583	0.795315	0	0	0
19	ENSDARG00000093440	tnfaip6	-0.106396	1.77406	0.794369	0	1	0
19	ENSDARG00000002235	mmp14a	0.218555	1.83647	0.792754	0	1	0
19	ENSDARG00000077121	cyp26b1	0.138313	2.28891	0.772863	0	1	0
19	ENSDARG00000093303	ifitm1	-0.335126	1.51328	0.764947	0	0	0
19	ENSDARG00000109337	nanos1	0.234662	0.896698	0.76467	0	0	0
19	ENSDARG00000024829	tnn	-0.0903675	2.0755	0.752774	0	1	0
19	ENSDARG00000068369	angptl2b	-0.175874	1.73448	0.735667	0	0	0
19	ENSDARG00000033307	igf2b	0.0617777	1.18681	0.724237	0	0	0
19	ENSDARG00000054906	ier5l	-0.0864695	1.65794	0.719734	0	0	0
19	ENSDARG00000021973	st13	-0.0531835	0.318856	0.701512	0	0	0
19	ENSDARG00000056134	c1qtnf5	0.653768	1.4131	0.682995	0	0	0
19	ENSDARG00000099491	tmem176l.1	-0.230403	1.40181	0.668394	0	0	0
19	ENSDARG00000077298	gas1a	0.0245154	0.956237	0.662127	0	0	0
19	ENSDARG00000056913	pcolcea	0.162558	0.838653	0.653966	0	0	0
19	ENSDARG00000011876	ednraa	0.0175171	0.89995	0.650797	0	0	0
19	ENSDARG00000091481	foxc1a	0.299884	1.16084	0.635209	0	0	0
19	ENSDARG00000078322	col12a1a	0.136753	1.03394	0.630884	0	0	0
19	ENSDARG00000061226	timp2a	0.352426	0.926995	0.630282	0	0	0
19	ENSDARG00000068732	spry4	0.00371721	1.12056	0.62978	0	0	0
19	ENSDARG00000005924	serpina10a	-0.0370332	1.15349	0.629371	0	0	0
19	ENSDARG00000017676	mmp2	0.210375	1.59796	0.614458	0	0	0
19	ENSDARG00000030215	matn1	0.357804	3.39775	0.614356	0	1	0
19	ENSDARG00000029353	serpine2	-0.254667	1.16448	0.597054	0	0	0
19	ENSDARG00000012071	angptl1a	0.221871	0.873149	0.590509	0	0	0
19	ENSDARG00000015015	tspan18b	0.01078	0.878327	0.584441	0	0	0
19	ENSDARG00000056087	ecrg4a	0.147317	2.22787	0.577824	0	1	0
19	ENSDARG00000059933	plpp3	0.103064	1.02255	0.573819	0	0	0
19	ENSDARG00000062129	mxra8b	0.257912	1.277	0.573324	0	0	0
19	ENSDARG00000068265	tomm5	0.0333111	0.806556	0.568204	0	0	0
19	ENSDARG00000073699	col9a1a	0.0292072	3.95936	0.545621	0	1	0
19	ENSDARG00000042690	s1pr1	-0.0681414	1.16349	0.543671	0	0	0
19	ENSDARG00000024492	col9a2	-0.172197	3.49736	0.533089	0	1	0
19	ENSDARG00000062936	ndnf	0.0120339	0.504928	0.528092	0	0	0
19	ENSDARG00000070494	pdgfra	0.160314	0.630004	0.526483	0	0	0
19	ENSDARG00000104110	col4a2	0.0660741	0.264257	0.516788	0	0	0
19	ENSDARG00000045694	prickle1b	0.285808	0.843265	0.510512	0	0	0
19	ENSDARG00000022509	cox4i2	0.443256	0.768523	0.507663	0	0	0
19	ENSDARG00000052437	mia	0.695675	2.73763	0.504238	0	1	0
19	ENSDARG00000092035	si:ch211-156j16.1	-0.0231863	0.842412	0.495862	0	0	0
19	ENSDARG00000038025	cbx7a	0.183676	1.5614	0.495659	0	0	0
19	ENSDARG00000010032	cmtm7	-0.033307	1.26094	0.490373	0	0	0
19	ENSDARG00000103443	vwde	0.516211	1.57355	0.481922	0	0	0
19	ENSDARG00000074242	serbp1a	0.173115	-0.0616646	0.472963	0	0	0
19	ENSDARG00000093549	selenop	0.183691	0.474509	0.472517	0	0	0
19	ENSDARG00000100968	si:ch211-1a19.3	0.110503	0.336221	0.472241	0	0	0
19	ENSDARG00000035682	FP102018.1	0.202685	1.21135	0.471574	0	0	0
19	ENSDARG00000037895	ramp2	0.200284	1.04087	0.459886	0	0	0
19	ENSDARG00000004363	lhfpl6	0.00312241	0.233854	0.457599	0	0	0
19	ENSDARG00000015312	klf12a	0.139668	1.02102	0.454623	0	0	0
19	ENSDARG00000056627	cxcl14	0.138552	0.30339	0.433089	0	0	0
19	ENSDARG00000060457	pmp22b	0.202923	0.662298	0.42835	0	0	0
19	ENSDARG00000074335	boc	0.139223	0.94301	0.416556	0	0	0
19	ENSDARG00000054438	fzd2	0.0955018	0.981959	0.414254	0	0	0
19	ENSDARG00000059049	zgc:174904	-0.343671	0.383812	0.409458	0	0	0
19	ENSDARG00000056995	snai1a	0.130832	0.763152	0.408328	0	0	0
19	ENSDARG00000038056	fgfbp2b	0.694459	2.64066	0.404062	0	1	0
19	ENSDARG00000069093	col2a1a	-0.28205	3.5233	0.400961	0	1	0
19	ENSDARG00000061328	cdon	0.124682	0.504273	0.395386	0	0	0
19	ENSDARG00000103211	si:dkey-19b23.8	-0.416974	1.28626	0.39112	0	0	0
19	ENSDARG00000101914	metrnla	-0.0592968	0.322904	0.386293	0	0	0
19	ENSDARG00000094809	ms4a17a.11	-0.00117783	1.39968	0.38161	0	0	0
19	ENSDARG00000013351	cirbpb	0.0868788	0.468662	0.379069	0	0	0
19	ENSDARG00000108475	otos	0.19621	3.04142	0.373173	0	1	0
19	ENSDARG00000011724	marveld1	0.0138144	1.31802	0.37068	0	0	0
19	ENSDARG00000039273	fbln5	0.440627	0.721207	0.369757	0	0	0
19	ENSDARG00000056950	epyc	-0.117818	2.97933	0.359686	0	1	0
19	ENSDARG00000014378	slc12a4	-0.0996022	0.295936	0.355166	0	0	0
19	ENSDARG00000060004	fzd7a	-0.040334	0.844551	0.325496	0	0	0
19	ENSDARG00000010434	clu	0.174697	1.3205	0.322577	0	0	0
19	ENSDARG00000044251	rasgef1bb	0.123196	0.450143	0.318811	0	0	0
19	ENSDARG00000045979	zgc:153704	0.181553	1.13156	0.312623	0	0	0
19	ENSDARG00000055498	si:ch1073-184j22.1	-0.0981623	0.995535	0.300244	0	0	0
19	ENSDARG00000100446	si:ch211-286o17.1	0.222085	0.65524	0.285486	0	0	0
19	ENSDARG00000005485	ucmab	-0.000256397	3.22742	0.282266	0	1	0
19	ENSDARG00000100946	si:ch211-212k18.9	0.271662	0.352481	0.236067	0	0	0
19	ENSDARG00000007275	si:ch211-251b21.1	0.301234	0.584035	0.229943	0	0	0
19	ENSDARG00000094295	CR855337.1	-0.0715158	0.475772	0.216063	0	0	0
19	ENSDARG00000021366	fbp1a	0.380553	0.800229	0.203856	0	0	0
19	ENSDARG00000078659	tmem176	0.10584	1.26901	0.201056	0	0	0
19	ENSDARG00000004714	tcf12	0.255483	0.876217	0.196255	0	0	0
19	ENSDARG00000054916	eif4ebp3	0.0560231	0.347277	0.195519	0	0	0
19	ENSDARG00000037116	cxcl12a	0.177634	1.2858	0.1908	0	0	0
19	ENSDARG00000055398	foxc1b	-0.0186165	1.56531	0.163857	0	0	0
19	ENSDARG00000015266	mab21l2	-0.0500659	0.391176	0.120297	0	0	0
19	ENSDARG00000074667	akt1s1	0.181381	0.156131	0.116526	0	0	0
19	ENSDARG00000092383	snorc	0.282542	3.61334	0.115487	0	1	0
19	ENSDARG00000052615	tnmd	0.538106	1.87693	0.101371	0	1	0
19	ENSDARG00000052846	fsta	0.27195	0.458047	0.0957608	0	0	0
19	ENSDARG00000105223	pmp22a	0.150271	1.0357	0.0909161	0	0	0
19	ENSDARG00000035891	acana	0.38324	1.67285	0.0695672	0	0	0
19	ENSDARG00000071673	ctdspla	0.427283	0.448333	0.0622656	0	0	0
19	ENSDARG00000054451	loxl1	0.161591	1.3965	0.0392545	0	0	0
19	ENSDARG00000076010	twist1b	0.261541	1.49523	0.0337559	0	0	0
19	ENSDARG00000015937	kptn	0.186234	0.23238	0.0251211	0	0	0
19	ENSDARG00000075015	soul5	0.0269601	-0.168853	0.0163606	0	0	0
19	ENSDARG00000030402	twist1a	0.0856214	1.01455	-0.0116575	0	0	0
19	ENSDARG00000027582	angptl7	0.177233	2.5368	-0.0257058	0	1	0
19	ENSDARG00000101481	rbp5	-0.199405	0.345402	-0.076883	0	0	0
19	ENSDARG00000021443	zfp36l1b	0.0196684	-0.181002	-0.0867343	0	0	0
19	ENSDARG00000070873	ccl25b	0.078776	1.32118	-0.110046	0	0	0
19	ENSDARG00000074869	si:ch1073-291c23.2	0.266712	0.761812	-0.110694	0	0	0
19	ENSDARG00000063612	antxr1c	0.141295	0.525465	-0.121148	0	0	0
19	ENSDARG00000044895	fmoda	0.505748	1.41469	-0.125415	0	0	0
19	ENSDARG00000011934	gyg1a	0.126057	0.333146	-0.156536	0	0	0
19	ENSDARG00000097617	si:ch211-178n15.1	0.0103014	1.39535	-0.179506	0	0	0
19	ENSDARG00000044935	hpdb	0.521965	0.380146	-0.208402	0	0	0
19	ENSDARG00000025670	fstl3	0.073118	1.935	-0.223179	0	1	0
19	ENSDARG00000117319	CABZ01092746.1	0.242581	0.381065	-0.23348	0	0	0
19	ENSDARG00000019646	twist3	0.587161	1.19617	-0.246211	0	0	0
19	ENSDARG00000019949	serpinh1b	-1.3221	2.51636	-0.249982	0	1	0
19	ENSDARG00000044132	ogna	0.518663	1.26651	-0.250769	0	0	0
19	ENSDARG00000101199	rbp4	-0.0629522	-0.634061	-0.283818	0	0	0
19	ENSDARG00000071095	abi3bpb	0.495013	0.857385	-0.313634	0	0	0
19	ENSDARG00000089418	si:dkey-164f24.2	0.467069	-0.289403	-0.441294	0	0	0
19	ENSDARG00000022650	cyp2ad3	-0.0270028	0.406034	-0.488847	0	0	0
19	ENSDARG00000020072	thbs4b	0.32531	1.44032	-0.511825	0	0	0
19	ENSDARG00000059391	gyg1b	-0.0329442	0.824971	-0.550468	0	0	0
19	ENSDARG00000016551	iqsec1b	-0.235404	-0.0725033	-0.599544	0	0	0
19	ENSDARG00000027984	gstz1	-0.0453677	-0.427268	-0.602201	0	0	0
19	ENSDARG00000043796	ms4a17a.7	0.420153	2.435	-0.708193	0	1	0
19	ENSDARG00000020143	pah	-0.0338857	0.594995	-0.713652	0	0	0
19	ENSDARG00000026611	socs3b	-0.391777	0.651843	-0.735919	0	0	0
19	ENSDARG00000006546	ak4	-0.0333789	-0.447593	-0.73704	0	0	0
19	ENSDARG00000089187	wfdc2	0.416679	2.12952	-0.754438	0	1	0
19	ENSDARG00000006526	fn1b	-0.132595	-0.538918	-0.800068	0	0	0
19	ENSDARG00000053485	aldh6a1	0.0622086	-0.399545	-0.842547	0	0	0
19	ENSDARG00000114760	asip2b	0.730279	1.0336	-0.845995	0	0	0
19	ENSDARG00000068710	nid1a	-0.496327	-0.502243	-0.918076	0	0	0
19	ENSDARG00000100795	timp4.3	-0.122673	1.08104	-0.953896	0	0	0
19	ENSDARG00000055897	zgc:154093	-0.198796	-0.95018	-0.980641	0	0	0
19	ENSDARG00000010008	vim	0.365003	0.257138	-0.997347	0	0	0
19	ENSDARG00000093381	tgm2l	-0.218691	1.34604	-1.02384	0	0	0
19	ENSDARG00000087697	lpl	0.132733	-0.445363	-1.09215	0	0	0
19	ENSDARG00000020053	nkd1	-0.0157154	0.000492272	-1.13294	0	0	0
19	ENSDARG00000011693	ttc36	-0.115339	0.016952	-1.40614	0	0	0
19	ENSDARG00000092033	si:dkey-239h2.3	0.420878	0.391908	-1.41621	0	0	0
19	ENSDARG00000023151	ucp1	0.383657	-1.52182	-1.44752	0	0	0
19	ENSDARG00000058005	hgd	-0.0816964	-1.10771	-1.7597	0	0	1
19	ENSDARG00000069630	tat	0.102942	0.162841	-1.81204	0	0	1
exocrine pancreas
20	ENSDARG00000103846	hspa5	-1.07688	1.22038	2.9568	0	0	1
20	ENSDARG00000004621	gpm6ab	0.00118323	2.43142	2.26272	0	1	1
20	ENSDARG00000003570	hsp90b1	-0.942068	0.200444	2.16145	0	0	1
20	ENSDARG00000029071	creld2	-0.926896	0.361126	2.15779	0	0	1
20	ENSDARG00000104105	ttf2	-0.514013	1.96	1.96115	0	1	1
20	ENSDARG00000074727	dnajc10	-0.12237	1.05349	1.92647	0	0	1
20	ENSDARG00000000551	slc1a4	-0.414347	1.83164	1.78585	0	1	1
20	ENSDARG00000019417	gadd45ga	-0.545123	1.38301	1.73428	0	0	0
20	ENSDARG00000029761	mpp6b	-0.433051	1.26553	1.5977	0	0	0
20	ENSDARG00000094345	si:dkey-261l7.2	-0.361627	0.169277	1.47088	0	0	0
20	ENSDARG00000018124	psmd3	-0.200733	0.500415	1.46783	0	0	0
20	ENSDARG00000093374	EPB41L2	0.0412237	0.637481	1.45882	0	0	0
20	ENSDARG00000045857	cebpz	0.0263895	0.814333	1.33783	0	0	0
20	ENSDARG00000018259	atp1a3a	-0.0862374	0.557333	1.33641	0	0	0
20	ENSDARG00000055455	gpm6aa	0.0581808	-0.286171	1.22346	0	0	0
20	ENSDARG00000031720	clstn1	-0.0926759	0.481799	1.21832	0	0	0
20	ENSDARG00000054804	anp32e	-0.0160595	0.706879	1.16016	0	0	0
20	ENSDARG00000101458	r3hdm1	-0.116252	0.890024	1.12173	0	0	0
20	ENSDARG00000015314	zc4h2	-0.165609	0.665121	1.09153	0	0	0
20	ENSDARG00000015793	creb3l1	0.691332	0.7256	1.06328	0	0	0
20	ENSDARG00000092798	ppib	-0.0390944	0.128929	1.06038	0	0	0
20	ENSDARG00000071424	ap3d1	-0.0258649	0.610708	1.05464	0	0	0
20	ENSDARG00000055900	zswim5	0.0654769	0.492696	1.0301	0	0	0
20	ENSDARG00000059373	dnajc8	-0.10757	0.356628	1.0168	0	0	0
20	ENSDARG00000029612	gpkow	-0.0151904	0.736228	0.992341	0	0	0
20	ENSDARG00000055389	si:dkey-67c22.2	-0.0177475	0.701494	0.987252	0	0	0
20	ENSDARG00000105131	cog1	-0.162528	0.290873	0.947892	0	0	0
20	ENSDARG00000004074	bach2b	-0.0226568	0.723031	0.944012	0	0	0
20	ENSDARG00000038213	slc35b1	-0.341949	0.319216	0.935911	0	0	0
20	ENSDARG00000024306	zbed4	-0.00175505	0.641821	0.893315	0	0	0
20	ENSDARG00000014498	ythdf2	-0.104985	0.672737	0.887912	0	0	0
20	ENSDARG00000058117	snap25b	-0.0443008	0.809856	0.882825	0	0	0
20	ENSDARG00000062139	eif2ak3	-0.146475	0.126916	0.856631	0	0	0
20	ENSDARG00000032037	bet1l	-0.0531025	0.782742	0.790658	0	0	0
20	ENSDARG00000054746	uggt1	-0.405667	-0.149466	0.690687	0	0	0
20	ENSDARG00000098194	SLC39A11	-0.14937	-0.253442	0.650762	0	0	0
20	ENSDARG00000020645	slc7a3a	0.498022	1.20807	0.597834	0	0	0
20	ENSDARG00000055086	ggnbp2	-0.0281791	0.317095	0.588099	0	0	0
20	ENSDARG00000097718	stard10	-0.131491	0.704325	0.575118	0	0	0
20	ENSDARG00000093205	AL845362.1	0.148681	0.493397	0.55208	0	0	0
20	ENSDARG00000012572	polr3f	-0.0614892	0.742557	0.547779	0	0	0
20	ENSDARG00000036295	golga7ba	-0.408081	1.29678	0.540609	0	0	0
20	ENSDARG00000017673	nova2	0.0237214	0.467975	0.531417	0	0	0
20	ENSDARG00000098639	pycr1b	-0.00572456	0.962463	0.499466	0	0	0
20	ENSDARG00000054031	mxd4	-0.149649	0.28347	0.461916	0	0	0
20	ENSDARG00000059804	retreg3	-0.121313	0.106132	0.445062	0	0	0
20	ENSDARG00000101627	ssr1	-0.1291	-0.000193324	0.436342	0	0	0
20	ENSDARG00000041110	dnajc3a	-0.372947	-0.265267	0.419029	0	0	0
20	ENSDARG00000001910	rorab	-0.165071	-0.265067	0.358838	0	0	0
20	ENSDARG00000055837	arhgef1b	-0.0589523	0.617278	0.34251	0	0	0
20	ENSDARG00000077880	si:ch211-255i20.3	0.0497528	-0.404291	0.332848	0	0	0
20	ENSDARG00000018263	pdia2	-0.0614659	-0.400762	0.297421	0	0	0
20	ENSDARG00000102640	pdia3	0.0524988	-0.350535	0.0808861	0	0	0
20	ENSDARG00000037121	mat2ab	0.142923	-0.240603	0.0689697	0	0	0
20	ENSDARG00000069242	pdia5	-0.117575	0.0324938	-0.145906	0	0	0
20	ENSDARG00000030915	cpa1	0.327292	-1.88446	-0.14804	0	1	0
20	ENSDARG00000014479	ptf1a	-0.199125	0.618353	-0.161092	0	0	0
20	ENSDARG00000073742	prss59.2	0.101531	-0.677086	-0.224957	0	0	0
20	ENSDARG00000032856	ccdc120	-0.124953	-0.65687	-0.3523	0	0	0
20	ENSDARG00000010878	cdkn1ca	0.0662366	0.498547	-0.386372	0	0	0
20	ENSDARG00000042993	prss1	0.17692	-1.13732	-0.416855	0	0	0
20	ENSDARG00000013856	amy2a	0.241331	-1.73665	-0.579591	0	0	0
20	ENSDARG00000006766	snd1	0.165546	-0.504795	-0.591454	0	0	0
20	ENSDARG00000045442	cpb1	0.274677	-1.05984	-0.702664	0	0	0
20	ENSDARG00000007276	ela3l	0.0193899	-1.67236	-0.809394	0	0	0
20	ENSDARG00000025311	cuzd1.2	-0.155854	-0.202527	-0.992709	0	0	0
20	ENSDARG00000075444	cgref1	-0.0414352	-0.756856	-1.26042	0	0	0
20	ENSDARG00000089050	cuzd1.1	-0.439828	-0.155636	-2.23337	0	0	1
enteroendocrine cells
21	ENSDARG00000016733	psat1	-0.628627	3.32075	3.81334	0	1	1
21	ENSDARG00000001873	phgdh	-0.40198	3.8856	3.29537	0	1	1
21	ENSDARG00000043673	si:dkey-174m14.3	-0.024312	0.133274	2.39449	0	0	1
21	ENSDARG00000019274	rasd1	-0.334069	2.02404	2.28491	0	1	1
21	ENSDARG00000117418	CR556712.1	0.283777	0.309783	2.17556	0	0	1
21	ENSDARG00000061099	nfasca	-0.0341028	1.67726	2.12368	0	0	1
21	ENSDARG00000019702	aldocb	-0.0769579	2.70635	2.03879	0	1	1
21	ENSDARG00000070453	gch1	0.0542736	1.11029	2.01016	0	0	1
21	ENSDARG00000091592	peli1a	-0.042666	1.18933	1.79225	0	0	1
21	ENSDARG00000037159	oprd1b	-0.0947764	0.0455626	1.73555	0	0	0
21	ENSDARG00000104458	rnasekb	-0.110295	2.04513	1.67839	0	1	0
21	ENSDARG00000053027	si:dkey-33i11.1	0.089656	1.23498	1.67471	0	0	0
21	ENSDARG00000099960	elovl1a	-0.388633	1.22647	1.66198	0	0	0
21	ENSDARG00000056590	calca	-0.165226	2.00716	1.6553	0	1	0
21	ENSDARG00000023117	gopc	-0.0638359	0.914109	1.6244	0	0	0
21	ENSDARG00000017595	ccdc6b	0.168012	0.809662	1.54763	0	0	0
21	ENSDARG00000013087	ndrg3a	-0.0354744	1.02308	1.53309	0	0	0
21	ENSDARG00000004460	desi2	-0.110584	1.24002	1.52206	0	0	0
21	ENSDARG00000015759	tspan7	-0.463896	0.498514	1.48755	0	0	0
21	ENSDARG00000104782	oaz1b	-0.0817318	1.00551	1.42967	0	0	0
21	ENSDARG00000099425	CABZ01073265.1	-0.336947	1.22458	1.42203	0	0	0
21	ENSDARG00000088612	si:ch211-153b23.7	-1.01916	1.77995	1.39119	0	1	0
21	ENSDARG00000075437	shc1	-0.0241894	0.48853	1.36839	0	0	0
21	ENSDARG00000056479	rab1bb	-0.386486	0.94097	1.343	0	0	0
21	ENSDARG00000013500	abca2	-0.0520591	0.626324	1.28022	0	0	0
21	ENSDARG00000101631	etfa	-0.0721479	0.770914	1.27212	0	0	0
21	ENSDARG00000035253	npr3	-0.336565	1.48434	1.22355	0	0	0
21	ENSDARG00000029501	gsk3aa	0.140086	0.790425	1.1906	0	0	0
21	ENSDARG00000069498	phkg1b	0.0516348	0.329476	1.18939	0	0	0
21	ENSDARG00000094646	dyrk2	0.205259	0.622314	1.18826	0	0	0
21	ENSDARG00000021374	cab39l1	0.00385993	0.852552	1.17595	0	0	0
21	ENSDARG00000013681	si:dkey-42i9.6	-0.0684277	0.882825	1.12505	0	0	0
21	ENSDARG00000005536	ubr7	-0.279561	0.741641	1.10435	0	0	0
21	ENSDARG00000103106	trappc9	-0.180167	-0.07098	1.07316	0	0	0
21	ENSDARG00000105113	galr2b	-0.412287	0.250769	1.06305	0	0	0
21	ENSDARG00000045248	h3f3d	-0.135053	1.03075	1.05206	0	0	0
21	ENSDARG00000039882	ap3s2	-0.411992	0.426757	1.04976	0	0	0
21	ENSDARG00000102636	trmt9b	0.276253	1.0334	1.04351	0	0	0
21	ENSDARG00000012040	rnf19a	-0.134558	0.460803	1.04056	0	0	0
21	ENSDARG00000058366	si:dkey-222f8.3	0.0280215	1.64209	1.03458	0	0	0
21	ENSDARG00000096631	MED9	-0.0930262	0.549835	1.00817	0	0	0
21	ENSDARG00000061647	nrxn1a	-0.102027	0.425261	1.00502	0	0	0
21	ENSDARG00000073872	tpst1	-0.0323681	0.551996	0.975899	0	0	0
21	ENSDARG00000021975	ginm1	-0.322906	1.19464	0.949335	0	0	0
21	ENSDARG00000069199	zgc:172120	-0.0289457	0.835219	0.945752	0	0	0
21	ENSDARG00000069438	neurl1aa	-0.137318	0.329331	0.94314	0	0	0
21	ENSDARG00000076765	ddhd2	-0.712647	-0.661877	0.937804	0	0	0
21	ENSDARG00000056587	cyp2r1	-0.801154	0.180066	0.927792	0	0	0
21	ENSDARG00000054911	tmsb	0.175209	1.62299	0.922372	0	0	0
21	ENSDARG00000071492	fbxo45	-0.4949	0.979918	0.920975	0	0	0
21	ENSDARG00000090472	ttll10	0.229481	0.555263	0.9015	0	0	0
21	ENSDARG00000004840	rassf1	-0.242836	1.70412	0.886767	0	0	0
21	ENSDARG00000038574	scg2b	-0.187329	0.744162	0.88658	0	0	0
21	ENSDARG00000016837	glipr2l	-0.834204	1.02682	0.880379	0	0	0
21	ENSDARG00000055381	bambia	0.0257308	0.222187	0.878763	0	0	0
21	ENSDARG00000098387	tmem176l.3a	0.506652	1.33608	0.86094	0	0	0
21	ENSDARG00000024940	rnf144b	-0.0971237	0.656492	0.856653	0	0	0
21	ENSDARG00000068628	rab8b	-0.427971	0.879508	0.847846	0	0	0
21	ENSDARG00000028721	mapk14b	-0.0195003	0.494418	0.830058	0	0	0
21	ENSDARG00000086654	cbln11	-1.0456	1.61044	0.798011	0	0	0
21	ENSDARG00000040152	nek4	-0.296985	0.761065	0.779672	0	0	0
21	ENSDARG00000006497	rtn1a	-0.0868536	0.327568	0.770583	0	0	0
21	ENSDARG00000032083	dpysl2b	-0.251165	0.460532	0.75816	0	0	0
21	ENSDARG00000057714	cmah	-0.0555706	0.437655	0.755268	0	0	0
21	ENSDARG00000062674	btbd10a	-0.0894116	0.582837	0.740079	0	0	0
21	ENSDARG00000100494	pbx1a	0.050486	0.737121	0.732123	0	0	0
21	ENSDARG00000004059	galk2	-0.660298	1.09689	0.709624	0	0	0
21	ENSDARG00000069940	ppap2d	-0.106381	0.824901	0.708049	0	0	0
21	ENSDARG00000076853	areg	-0.0715747	0.973327	0.671611	0	0	0
21	ENSDARG00000069009	si:ch211-147a11.3	-0.227409	0.167454	0.642146	0	0	0
21	ENSDARG00000032155	ppm1aa	0.00266437	0.0589821	0.621225	0	0	0
21	ENSDARG00000075886	vwa5b2	0.0232294	-0.062357	0.60359	0	0	0
21	ENSDARG00000042557	rnf144ab	0.0887094	0.431351	0.574453	0	0	0
21	ENSDARG00000043857	ufm1	-0.227316	0.469495	0.557343	0	0	0
21	ENSDARG00000063157	mapk8ip2	-0.218068	0.561346	0.540079	0	0	0
21	ENSDARG00000038199	cdab	0.172661	-0.00658278	0.488719	0	0	0
21	ENSDARG00000057913	syt11a	0.00965798	0.528274	0.469112	0	0	0
21	ENSDARG00000036505	syt4	-0.231687	0.757841	0.406438	0	0	0
21	ENSDARG00000027200	gabarapl2	-0.143858	0.0403675	0.39763	0	0	0
21	ENSDARG00000101008	soul4	-0.0457783	0.367715	0.392476	0	0	0
21	ENSDARG00000053129	carhsp1	0.266204	0.158311	0.384308	0	0	0
21	ENSDARG00000014361	tmbim4	-0.0924146	0.308312	0.35881	0	0	0
21	ENSDARG00000071116	eepd1	-0.100971	-0.78245	0.352257	0	0	0
21	ENSDARG00000053831	vtnb	-0.332048	0.0290175	0.338226	0	0	0
21	ENSDARG00000063076	atrip	-0.733355	0.0617565	0.331678	0	0	0
21	ENSDARG00000000068	slc9a3r1a	0.080448	0.112885	0.274063	0	0	0
21	ENSDARG00000104207	pcyt1bb	-0.0169243	-1.25831	0.211376	0	0	0
21	ENSDARG00000056642	hdac9b	-0.44538	0.191133	0.196349	0	0	0
21	ENSDARG00000104538	tmem184a	-0.0959779	-0.47592	0.187102	0	0	0
21	ENSDARG00000025693	tmem9b	-0.299818	0.391714	0.17516	0	0	0
21	ENSDARG00000099819	sb:cb1058	-0.121004	0.11213	0.138019	0	0	0
21	ENSDARG00000038687	nfkb2	-0.622679	0.392341	0.0557505	0	0	0
21	ENSDARG00000086740	phyh	-0.058082	-0.946627	0.0151023	0	0	0
21	ENSDARG00000037362	scube2	0.134831	0.572795	-0.027268	0	0	0
21	ENSDARG00000095152	si:ch211-255i3.4	0.0495346	-0.12682	-0.0327769	0	0	0
21	ENSDARG00000041295	lim2.5	0.373772	3.22023	-0.107312	0	1	0
21	ENSDARG00000030087	nfkbib	-0.470093	0.492781	-0.117899	0	0	0
21	ENSDARG00000008049	si:dkey-42i9.4	-0.329274	0.248828	-0.203744	0	0	0
21	ENSDARG00000025914	si:dkey-190g11.3	0.818292	-0.0237078	-0.482361	0	0	0
21	ENSDARG00000073704	si:dkeyp-72g9.4	-0.108213	-1.54766	-0.622748	0	0	0
21	ENSDARG00000056239	tmem45b	-0.12415	-0.103666	-0.624032	0	0	0
21	ENSDARG00000055278	cfb	-0.69224	0.5625	-0.871548	0	0	0
21	ENSDARG00000039211	zgc:77439	0.753865	-1.67202	-0.953775	0	0	0
21	ENSDARG00000074771	ifngr1	-0.229189	-0.0868656	-1.14443	0	0	0
21	ENSDARG00000059743	tmem98	-0.280134	-0.81801	-1.15383	0	0	0
21	ENSDARG00000038296	tmem86b	0.0579449	-0.660541	-1.33398	0	0	0
enteroendocrine cells
22	ENSDARG00000043154	ucp2	0.218361	1.44667	2.68692	0	0	1
22	ENSDARG00000035631	sdf2l1	-0.83691	0.725151	2.0614	0	0	1
22	ENSDARG00000079296	gcga	-0.0731078	1.58251	1.83997	0	0	1
22	ENSDARG00000019451	pcsk2	0.210574	-0.115856	1.59788	0	0	0
22	ENSDARG00000016412	agt	-0.515773	2.1687	1.47439	0	1	0
22	ENSDARG00000074490	casc4	0.0528411	0.556831	1.4712	0	0	0
22	ENSDARG00000018492	znf503	0.222282	1.07323	1.29909	0	0	0
22	ENSDARG00000091377	galn	-0.156126	0.545189	1.29525	0	0	0
22	ENSDARG00000070966	insl5a	-0.0813859	-0.0958238	1.27374	0	0	0
22	ENSDARG00000004261	tmed9	-0.286588	0.945962	1.19239	0	0	0
22	ENSDARG00000079443	vipb	-0.347969	0.649324	1.05182	0	0	0
22	ENSDARG00000069294	insl5b	-0.0869327	-0.139465	1.00301	0	0	0
22	ENSDARG00000002779	pdx1	0.308298	0.392379	0.974152	0	0	0
22	ENSDARG00000093089	tac3a	-0.422672	0.441917	0.878924	0	0	0
22	ENSDARG00000008829	chga	0.190071	1.28813	0.790734	0	0	0
22	ENSDARG00000069028	rxfp3.3a1	-0.23954	0.646663	0.78871	0	0	0
22	ENSDARG00000105503	fndc3a	-0.11084	0.195662	0.716831	0	0	0
22	ENSDARG00000098112	btc	-0.0285407	0.389079	0.561051	0	0	0
22	ENSDARG00000070603	hspa12a	-0.172941	1.15328	0.527634	0	0	0
22	ENSDARG00000002644	rgs5a	0.251287	0.353742	0.515592	0	0	0
22	ENSDARG00000060092	zgc:165481	0.0881445	0.694706	0.473191	0	0	0
22	ENSDARG00000103697	arnt2	0.275178	0.607071	0.416524	0	0	0
22	ENSDARG00000101606	rims2a	0.241615	0.972433	0.307255	0	0	0
22	ENSDARG00000003281	pik3ip1	0.191324	0.572003	0.275288	0	0	0
22	ENSDARG00000003681	eif5	-0.0710386	0.325185	0.257115	0	0	0
22	ENSDARG00000045594	shisal1a	0.0208431	0.678943	0.250884	0	0	0
22	ENSDARG00000062972	hip1	-0.0927728	-0.315288	0.207757	0	0	0
22	ENSDARG00000058133	foxd2	-0.437514	0.244527	0.19092	0	0	0
22	ENSDARG00000017739	ak5l	0.174285	1.45704	-0.0462973	0	0	0
22	ENSDARG00000087413	bean1	-0.116133	0.205446	-0.0723489	0	0	0
22	ENSDARG00000019541	gpt2l	-0.0741584	0.0793061	-0.121496	0	0	0
22	ENSDARG00000052271	slc22a18	-0.323406	0.0947403	-0.183503	0	0	0
22	ENSDARG00000058819	nog1	-0.22687	0.43035	-0.265904	0	0	0
22	ENSDARG00000055540	pfkfb4a	0.493881	-0.222375	-0.290755	0	0	0
22	ENSDARG00000028485	cabp5b	-2.17465	2.3332	-0.411769	0	0	0
22	ENSDARG00000002994	itpkca	-0.280369	-0.440411	-0.834034	0	0	0
22	ENSDARG00000025615	prr15la	-0.223499	-0.86906	-1.43096	0	0	0
22	ENSDARG00000068387	slc6a18	-0.39689	-0.541804	-3.23319	0	0	1
22	ENSDARG00000016918	ace2	0.00832202	-0.933358	-7.94015	0	0	1
epidermis
23	ENSDARG00000053448	si:ch211-251f6.6	-0.269147	3.2599	5.08011	0	1	1
23	ENSDARG00000033999	cyp26a1	-0.620513	1.57331	3.1442	0	0	1
23	ENSDARG00000042725	cebpb	-0.355886	1.21718	2.1716	0	0	1
23	ENSDARG00000036558	col18a1a	0.0508694	0.988055	2.1453	0	0	1
23	ENSDARG00000043806	postna	0.770962	2.14351	2.05652	0	1	1
23	ENSDARG00000058557	il11b	-1.80931	3.69573	1.77027	0	1	0
23	ENSDARG00000013841	abl2	-0.0814278	0.673773	1.72737	0	0	0
23	ENSDARG00000040295	apoeb	-0.282532	0.488727	1.70863	0	0	0
23	ENSDARG00000056248	si:dkey-183i3.5	0.131568	0.204597	1.61954	0	0	0
23	ENSDARG00000090268	krtt1c19e	0.233432	0.66949	1.59665	0	0	0
23	ENSDARG00000061948	amotl2b	0.260052	1.17236	1.5961	0	0	0
23	ENSDARG00000099749	ube2d2l	-0.120503	1.55367	1.576	0	0	0
23	ENSDARG00000102299	cxcl8b.1	-0.0956011	1.42892	1.50194	0	0	0
23	ENSDARG00000016200	trib3	0.0544604	1.66175	1.44729	0	0	0
23	ENSDARG00000055192	zgc:136930	0.164892	-0.00244146	1.42469	0	0	0
23	ENSDARG00000063539	slc25a15a	-0.186074	1.02393	1.40692	0	0	0
23	ENSDARG00000007099	cx43.4	0.0310911	1.75668	1.40262	0	1	0
23	ENSDARG00000010752	acsl4b	0.0426226	1.14039	1.34888	0	0	0
23	ENSDARG00000042816	mmp9	-1.00745	2.45089	1.33407	0	1	0
23	ENSDARG00000096849	si:dkey-16p21.8	0.0274135	0.367281	1.32258	0	0	0
23	ENSDARG00000077842	ajuba	0.128543	0.95045	1.29628	0	0	0
23	ENSDARG00000012671	inhbaa	-0.084392	1.7391	1.21173	0	0	0
23	ENSDARG00000007923	ptpn1	0.0103657	0.891656	1.20489	0	0	0
23	ENSDARG00000008363	mcl1b	-0.139116	0.94284	1.17854	0	0	0
23	ENSDARG00000069415	col17a1a	0.293988	1.27937	1.16143	0	0	0
23	ENSDARG00000032708	arl4cb	0.124852	1.23354	1.12181	0	0	0
23	ENSDARG00000023303	zgc:66427	-0.0762415	1.03543	1.0881	0	0	0
23	ENSDARG00000024124	sde2	-0.0062431	0.770549	1.02794	0	0	0
23	ENSDARG00000090369	zgc:86896	0.605436	1.44351	1.02258	0	0	0
23	ENSDARG00000003216	anxa2a	0.124431	2.57255	0.984629	0	1	0
23	ENSDARG00000060796	slc20a2	-0.17223	1.2525	0.971913	0	0	0
23	ENSDARG00000022615	si:ch211-241e1.3	0.729472	1.88814	0.938271	0	1	0
23	ENSDARG00000088711	lgals1l1	0.129452	2.7986	0.917954	0	1	0
23	ENSDARG00000042866	cx35.4	0.177113	1.19416	0.916396	0	0	0
23	ENSDARG00000069946	itga6b	0.745103	1.23044	0.89235	0	0	0
23	ENSDARG00000010785	thbs1b	0.118582	1.34042	0.851634	0	0	0
23	ENSDARG00000103889	mettl17	-0.0462759	0.960328	0.819567	0	0	0
23	ENSDARG00000052063	col4a5	0.391714	0.718691	0.81075	0	0	0
23	ENSDARG00000068755	exosc8	0.0186033	0.832562	0.789009	0	0	0
23	ENSDARG00000005104	limk2	-0.181114	1.1477	0.783494	0	0	0
23	ENSDARG00000036830	krt91	0.418134	0.415118	0.760464	0	0	0
23	ENSDARG00000052148	ptgs1	-0.646846	1.87456	0.730981	0	1	0
23	ENSDARG00000056029	cyp26c1	0.136135	2.1433	0.730237	0	1	0
23	ENSDARG00000059079	vps25	-0.1841	0.932287	0.727735	0	0	0
23	ENSDARG00000004451	tnfrsfa	0.0396981	0.876368	0.692975	0	0	0
23	ENSDARG00000044356	tp63	0.373965	1.49117	0.68092	0	0	0
23	ENSDARG00000052061	col4a6	0.371336	0.585217	0.661138	0	0	0
23	ENSDARG00000045958	egfl6	0.379161	1.11687	0.648455	0	0	0
23	ENSDARG00000027088	ptgdsb.1	0.436719	0.0574741	0.638576	0	0	0
23	ENSDARG00000010255	bin2b	-0.371189	1.35111	0.627194	0	0	0
23	ENSDARG00000035810	rgcc	-0.00615053	0.348118	0.622968	0	0	0
23	ENSDARG00000045019	aamp	-0.0426361	0.256098	0.613009	0	0	0
23	ENSDARG00000018971	b3gnt5a	-0.0555478	0.799386	0.581739	0	0	0
23	ENSDARG00000012972	cfl1l	0.310872	1.38608	0.577847	0	0	0
23	ENSDARG00000099555	foxo1a	0.35018	0.112053	0.472773	0	0	0
23	ENSDARG00000018923	fat2	0.348754	1.39411	0.469049	0	0	0
23	ENSDARG00000058371	krt5	0.670656	-0.149881	0.460922	0	0	0
23	ENSDARG00000056873	and3	0.337327	1.05924	0.442985	0	0	0
23	ENSDARG00000051814	ptprz1a	0.135086	1.18242	0.427146	0	0	0
23	ENSDARG00000055373	sema3fb	0.0665485	0.950463	0.403487	0	0	0
23	ENSDARG00000040046	snai2	0.210817	1.69604	0.40181	0	0	0
23	ENSDARG00000054616	cldni	0.40185	1.55969	0.392636	0	0	0
23	ENSDARG00000040606	tfap2c	0.258746	1.65975	0.378245	0	0	0
23	ENSDARG00000052697	fam172a	0.130305	0.277192	0.352075	0	0	0
23	ENSDARG00000088717	ecrg4b	0.259946	2.13851	0.310298	0	1	0
23	ENSDARG00000056499	ca6	0.238179	1.82174	0.270074	0	1	0
23	ENSDARG00000104992	epgn	0.053866	2.2139	0.266005	0	1	0
23	ENSDARG00000061796	rasgrp4	0.0674052	1.08814	0.256821	0	0	0
23	ENSDARG00000092283	cxl34b.11	-0.048398	1.38363	0.237182	0	0	0
23	ENSDARG00000079745	si:ch211-166a6.5	0.340456	0.353964	0.204229	0	0	0
23	ENSDARG00000052118	adamtsl5	0.36907	0.949348	0.199148	0	0	0
23	ENSDARG00000102829	cobll1b	-0.101252	0.578077	0.188142	0	0	0
23	ENSDARG00000076799	rnd3a	0.0627352	1.04339	0.0787221	0	0	0
23	ENSDARG00000113572	si:dkey-102c8.3	0.421489	1.60656	0.0755781	0	0	0
23	ENSDARG00000097746	si:rp71-77l1.1	1.01474	2.17424	0.0678301	0	1	0
23	ENSDARG00000040045	cldn1	0.383823	1.09709	0.0634023	0	0	0
23	ENSDARG00000004672	ptk2ab	-0.147227	-0.158885	-0.0504036	0	0	0
23	ENSDARG00000060008	hhipl2	0.716695	1.38952	-0.0552665	0	0	0
23	ENSDARG00000101170	rab42b	0.188664	1.50033	-0.075025	0	0	0
23	ENSDARG00000014626	dlx3b	0.463188	0.429458	-0.0785208	0	0	0
23	ENSDARG00000004658	zgc:101810	0.361289	1.45069	-0.087186	0	0	0
23	ENSDARG00000068409	vgll4l	0.15071	1.49353	-0.11785	0	0	0
23	ENSDARG00000058570	ccl27a	0.671103	1.80897	-0.301837	0	0	0
23	ENSDARG00000089645	si:ch1073-406l10.2	0.326416	0.958278	-0.309057	0	0	0
23	ENSDARG00000045887	mmp30	0.663047	1.90118	-0.356528	0	1	0
23	ENSDARG00000023532	pinx1	0.0414523	0.460747	-0.367389	0	0	0
23	ENSDARG00000057590	si:ch1073-396h14.1	0.469816	0.853423	-0.979961	0	0	0
unknown
24	ENSDARG00000057180	il17c	-2.19884	2.50899	2.9847	1	1	1
24	ENSDARG00000038969	zgc:113142	1.7295	-0.906521	2.81625	0	0	1
24	ENSDARG00000041294	noxo1a	-0.832236	3.06009	2.37126	0	1	1
24	ENSDARG00000097725	si:dkey-96g2.1	-0.0474042	1.04304	2.3175	0	0	1
24	ENSDARG00000099411	zgc:158343	-0.395027	2.15952	2.28815	0	1	1
24	ENSDARG00000091234	si:ch73-335l21.4	0.0322726	2.04068	2.16143	0	1	1
24	ENSDARG00000020377	eif4g2a	-0.174148	1.64877	2.13055	0	0	1
24	ENSDARG00000040700	nab1b	-0.927439	1.64585	2.01756	0	0	1
24	ENSDARG00000054304	homeza	-0.616413	1.62544	2.00568	0	0	1
24	ENSDARG00000003963	traf4a	-0.0466304	1.4426	1.89882	0	0	1
24	ENSDARG00000104795	cxcl8a	-1.44661	4.10085	1.8165	0	1	1
24	ENSDARG00000062550	rc3h1a	-0.0959073	0.80159	1.78808	0	0	1
24	ENSDARG00000075468	vwa1	-0.0207977	1.44989	1.73152	0	0	0
24	ENSDARG00000026723	syncripl	0.0301609	1.10281	1.59775	0	0	0
24	ENSDARG00000004160	reep3b	0.089514	1.64023	1.52103	0	0	0
24	ENSDARG00000056525	bcar1	-0.0590404	0.829491	1.50964	0	0	0
24	ENSDARG00000003270	dhps	-0.112769	0.986855	1.44543	0	0	0
24	ENSDARG00000078592	nomo	-0.421953	0.716792	1.4319	0	0	0
24	ENSDARG00000079765	si:ch211-112f3.4	0.201449	0.923722	1.37953	0	0	0
24	ENSDARG00000010085	p4ha2	0.0384966	1.42511	1.37075	0	0	0
24	ENSDARG00000040890	fdps	-0.372808	-0.191342	1.31839	0	0	0
24	ENSDARG00000029795	prxl2b	-0.00969881	-0.20281	1.29069	0	0	0
24	ENSDARG00000071107	wnt7bb	0.106288	1.44195	1.24816	0	0	0
24	ENSDARG00000058322	enc3	0.0100346	0.754655	1.23231	0	0	0
24	ENSDARG00000042707	cx30.3	0.13688	1.72617	1.22813	0	0	0
24	ENSDARG00000025522	sgk1	0.246082	-0.104782	1.22638	0	0	0
24	ENSDARG00000030278	idh3a	-0.164009	0.965478	1.20976	0	0	0
24	ENSDARG00000032876	trit1	0.186309	0.763775	1.19976	0	0	0
24	ENSDARG00000036776	aldh8a1	-0.274088	0.525255	1.19293	0	0	0
24	ENSDARG00000027744	gadd45ba	-0.0946909	0.639494	1.18038	0	0	0
24	ENSDARG00000103699	ptpn13	-0.233478	1.31867	1.16127	0	0	0
24	ENSDARG00000074319	sall1a	-0.308698	1.50976	1.13807	0	0	0
24	ENSDARG00000079900	shroom4	0.205829	1.23376	1.12525	0	0	0
24	ENSDARG00000044405	ttc4	-0.183698	1.19304	1.12508	0	0	0
24	ENSDARG00000035571	abhd17b	0.0796018	0.873008	1.10465	0	0	0
24	ENSDARG00000039034	marcksl1a	-0.0793109	1.14991	1.09419	0	0	0
24	ENSDARG00000006332	snx14	-0.127698	0.681226	1.08707	0	0	0
24	ENSDARG00000075666	tsc22d3	-0.226109	0.269071	1.0424	0	0	0
24	ENSDARG00000074599	frmd4ba	-0.0744052	0.5626	1.04144	0	0	0
24	ENSDARG00000029215	ube2z	0.0297936	0.619775	1.00587	0	0	0
24	ENSDARG00000117336	CU855948.1	-0.138594	-0.0440468	0.993481	0	0	0
24	ENSDARG00000077473	mych	-0.120431	0.653493	0.985612	0	0	0
24	ENSDARG00000005162	tpm3	-0.00671024	0.955492	0.981919	0	0	0
24	ENSDARG00000089075	si:ch73-173p19.1	-0.376149	0.549841	0.981669	0	0	0
24	ENSDARG00000010625	clic2	-0.338956	1.79762	0.966535	0	1	0
24	ENSDARG00000043710	parvaa	-0.0774267	0.76037	0.965057	0	0	0
24	ENSDARG00000103027	clns1a	-0.30236	0.621176	0.961948	0	0	0
24	ENSDARG00000014680	znf710a	-0.132025	0.652242	0.951416	0	0	0
24	ENSDARG00000075892	bag6	-0.124176	0.579973	0.933264	0	0	0
24	ENSDARG00000027345	mpzl2b	-0.0751916	1.09811	0.92507	0	0	0
24	ENSDARG00000058543	lama5	0.221984	0.330453	0.925047	0	0	0
24	ENSDARG00000005479	tenm3	0.179615	0.95943	0.897599	0	0	0
24	ENSDARG00000016623	si:ch211-195b13.1	-0.163242	1.01916	0.896426	0	0	0
24	ENSDARG00000057679	sh2b1	-0.0463064	0.512942	0.889122	0	0	0
24	ENSDARG00000068182	crb3b	-0.164608	1.03844	0.875745	0	0	0
24	ENSDARG00000028327	gmfb	-0.362845	0.516478	0.844887	0	0	0
24	ENSDARG00000013598	tnfb	-0.581564	1.84123	0.824909	0	1	0
24	ENSDARG00000099309	si:zfos-169g10.3	-0.187224	0.634301	0.821092	0	0	0
24	ENSDARG00000052625	fkbp1b	0.0443008	0.991308	0.772941	0	0	0
24	ENSDARG00000077850	lgals3a	-0.145485	-0.125693	0.754103	0	0	0
24	ENSDARG00000034718	tfpia	0.0242536	0.630715	0.622893	0	0	0
24	ENSDARG00000012390	kcnk5b	0.0212149	0.412492	0.488823	0	0	0
24	ENSDARG00000032765	net1	-0.0893506	0.295581	0.481139	0	0	0
24	ENSDARG00000009881	ier5	0.122991	0.474619	0.473339	0	0	0
24	ENSDARG00000055678	akap12b	0.173443	1.23185	0.43761	0	0	0
24	ENSDARG00000057606	arl4ca	0.170742	0.322331	0.429648	0	0	0
24	ENSDARG00000007693	nfkbiab	-0.514424	0.362656	0.352273	0	0	0
24	ENSDARG00000002332	frmd6	0.12806	0.791945	0.303629	0	0	0
24	ENSDARG00000039269	arg2	0.125975	0.221667	0.299986	0	0	0
24	ENSDARG00000054930	tpra1	-0.014046	-0.103515	0.277823	0	0	0
24	ENSDARG00000114454	CR762483.1	-1.34656	1.90037	0.261692	0	1	0
24	ENSDARG00000014692	znf622	-0.12436	0.452441	0.256394	0	0	0
24	ENSDARG00000091003	il34	-0.244033	0.732512	0.241759	0	0	0
24	ENSDARG00000044827	wnt7aa	0.182629	1.41673	0.213804	0	0	0
24	ENSDARG00000042357	cldnk	-0.0731111	-1.41029	0.210227	0	0	0
24	ENSDARG00000079889	phldb2a	-0.174999	0.735088	0.181259	0	0	0
24	ENSDARG00000068367	nfkbie	-0.398936	-0.0952399	0.154399	0	0	0
24	ENSDARG00000099532	ubl3a	-0.170601	0.290349	0.0660393	0	0	0
24	ENSDARG00000079283	si:ch211-247j9.1	-0.125065	0.708393	0.0571608	0	0	0
24	ENSDARG00000070578	edn2	0.0503206	1.24253	-0.137734	0	0	0
24	ENSDARG00000102377	slc6a16b	0.0700315	0.570387	-0.150648	0	0	0
24	ENSDARG00000053456	GK3P	-0.503512	-0.194058	-0.178527	0	0	0
24	ENSDARG00000061798	arhgap27l	-0.344931	-0.239422	-0.435648	0	0	0
24	ENSDARG00000074989	sparcl1	-0.617826	0.0620697	-0.620841	0	0	0
24	ENSDARG00000029305	baiap2l1a	0.318272	0.277242	-0.754437	0	0	0
24	ENSDARG00000094012	si:dkey-192g7.3	-0.301154	-0.777405	-1.02361	0	0	0
24	ENSDARG00000087574	nox1	-1.24027	0.852359	-1.08325	0	0	0
24	ENSDARG00000032010	slc15a2	0.159989	-0.463041	-1.168	0	0	0
24	ENSDARG00000012694	c3a.1	-0.726684	-0.29167	-1.7584	0	0	1
24	ENSDARG00000086374	isg15	-0.240547	-1.17132	-2.60058	0	0	1
red blood cells
25	ENSDARG00000054255	tctex1d2	-0.269256	0.440177	4.09492	0	0	1
25	ENSDARG00000004406	spra	-0.112218	0.678958	2.61425	0	0	1
25	ENSDARG00000100741	cdc20	-0.939072	1.75409	2.61014	0	1	1
25	ENSDARG00000057286	swap70b	-0.214732	2.07144	2.42263	0	1	1
25	ENSDARG00000070061	gfer	-0.275656	2.09702	2.36641	0	1	1
25	ENSDARG00000002403	nusap1	-0.913942	1.56663	2.17512	0	0	1
25	ENSDARG00000005454	tacc3	-0.842832	1.91455	2.14029	0	1	1
25	ENSDARG00000055133	cenpf	-0.963609	1.82945	2.02833	0	1	1
25	ENSDARG00000002405	si:ch211-225b11.1	-0.20233	1.63807	1.96017	0	0	1
25	ENSDARG00000062664	oxnad1	0.11343	1.43216	1.93888	0	0	1
25	ENSDARG00000006818	urod	-0.314809	0.767683	1.91206	0	0	1
25	ENSDARG00000035519	histh1l	0.4577	0.585589	1.82336	0	0	1
25	ENSDARG00000103038	pik3r3a	0.120052	1.62786	1.79482	0	0	1
25	ENSDARG00000021149	cbr1l	0.00753855	-0.240751	1.76973	0	0	1
25	ENSDARG00000053554	wdr76	-0.153057	-0.024105	1.76532	0	0	1
25	ENSDARG00000008333	znfl2a	-0.745308	1.13729	1.74758	0	0	0
25	ENSDARG00000102995	rbm24a	-0.0262361	1.03627	1.70161	0	0	0
25	ENSDARG00000063726	cdk12	-0.102786	0.677068	1.69709	0	0	0
25	ENSDARG00000100990	nme3	-0.0271154	1.67302	1.67218	0	0	0
25	ENSDARG00000105231	kmt5aa	-0.151331	0.796393	1.5828	0	0	0
25	ENSDARG00000009315	clgn	-0.210939	1.28332	1.56279	0	0	0
25	ENSDARG00000034852	nt5c2l1	0.0477866	0.886229	1.56039	0	0	0
25	ENSDARG00000055753	suv39h1b	-0.421775	1.15674	1.52792	0	0	0
25	ENSDARG00000069829	rragca	-0.322068	0.891856	1.49863	0	0	0
25	ENSDARG00000034503	per2	0.182291	-1.88476	1.48544	0	1	0
25	ENSDARG00000000019	ube2h	-0.164884	1.16013	1.43696	0	0	0
25	ENSDARG00000053571	adob	-0.188303	1.5813	1.43661	0	0	0
25	ENSDARG00000043665	glrx5	-0.185802	0.9443	1.42291	0	0	0
25	ENSDARG00000031775	ube2s	-0.415061	1.54665	1.4154	0	0	0
25	ENSDARG00000091385	zgc:165409	-0.173346	0.98384	1.40388	0	0	0
25	ENSDARG00000095304	si:ch211-207c6.2	0.130629	0.437333	1.37355	0	0	0
25	ENSDARG00000029510	timm17a	-0.138218	0.904956	1.36313	0	0	0
25	ENSDARG00000059857	blvra	-0.0450037	-0.313757	1.32799	0	0	0
25	ENSDARG00000086425	prpf3	-0.0518946	1.02977	1.32337	0	0	0
25	ENSDARG00000004262	cyp46a1.2	-0.175471	0.904476	1.32302	0	0	0
25	ENSDARG00000076560	apbb1	-0.0664654	0.834953	1.32147	0	0	0
25	ENSDARG00000023713	aqp1a.1	-0.227662	1.16817	1.2803	0	0	0
25	ENSDARG00000011122	pptc7a	0.0760942	0.843305	1.27372	0	0	0
25	ENSDARG00000018399	rps6kb1a	-0.221777	0.889076	1.26999	0	0	0
25	ENSDARG00000051956	isca1	0.145206	1.09427	1.2691	0	0	0
25	ENSDARG00000041839	tsc22d2	0.106998	0.700972	1.25994	0	0	0
25	ENSDARG00000117484	CABZ01052570.1	0.193723	0.86704	1.2491	0	0	0
25	ENSDARG00000104808	jak2a	-0.141712	-0.0724613	1.24484	0	0	0
25	ENSDARG00000009862	dcps	-0.100421	-0.0957287	1.244	0	0	0
25	ENSDARG00000002523	hsdl2	-0.207726	0.0398308	1.24057	0	0	0
25	ENSDARG00000069421	grpel2	0.0951534	1.22615	1.23429	0	0	0
25	ENSDARG00000098972	mrps16	-0.192134	0.993885	1.21536	0	0	0
25	ENSDARG00000079128	becn1	-0.109235	0.772074	1.21326	0	0	0
25	ENSDARG00000036870	arih1l	-0.12803	0.689824	1.20804	0	0	0
25	ENSDARG00000024669	oser1	-0.048735	0.826857	1.19532	0	0	0
25	ENSDARG00000003058	fgfr1op	-0.328976	0.798402	1.19276	0	0	0
25	ENSDARG00000094300	nupr1a	-0.155657	1.01252	1.18274	0	0	0
25	ENSDARG00000087238	si:ch211-161h7.4	-0.490889	0.987198	1.16152	0	0	0
25	ENSDARG00000057987	uba3	-0.113236	0.727008	1.15558	0	0	0
25	ENSDARG00000015551	fth1a	-0.25745	1.12055	1.14444	0	0	0
25	ENSDARG00000078567	lonrf1l	0.249928	-1.49409	1.14097	0	0	0
25	ENSDARG00000024311	nsmce4a	-0.393708	1.00446	1.13894	0	0	0
25	ENSDARG00000076509	polr2d	-0.190597	1.00612	1.13782	0	0	0
25	ENSDARG00000063677	ccny	-0.161981	0.753215	1.13315	0	0	0
25	ENSDARG00000074955	nup98	-0.047935	0.876861	1.13073	0	0	0
25	ENSDARG00000039130	cdkn3	-0.114918	0.438749	1.12966	0	0	0
25	ENSDARG00000030129	si:ch211-87m7.2	-0.218024	0.497811	1.1164	0	0	0
25	ENSDARG00000023330	anp32b	-0.145706	0.961339	1.11468	0	0	0
25	ENSDARG00000098344	rab18b	-0.13704	0.621255	1.10847	0	0	0
25	ENSDARG00000099358	hccsb	-0.000629863	0.798711	1.10041	0	0	0
25	ENSDARG00000016463	trappc6b	-0.425499	0.348261	1.096	0	0	0
25	ENSDARG00000061854	lman2	-0.243555	0.731979	1.09131	0	0	0
25	ENSDARG00000097385	si:ch211-15d5.12	0.0454131	0.626128	1.08502	0	0	0
25	ENSDARG00000037284	ptges3a	-0.168159	0.727582	1.08052	0	0	0
25	ENSDARG00000013655	tpd52l2b	-0.0429738	0.958348	1.08042	0	0	0
25	ENSDARG00000089475	hbae1.1	-0.732625	0.764166	1.0708	0	0	0
25	ENSDARG00000069807	zdhhc18a	-0.123766	0.668752	1.06831	0	0	0
25	ENSDARG00000104071	hikeshi	-0.163294	0.585186	1.03774	0	0	0
25	ENSDARG00000098761	rgs2	-0.23232	0.55963	1.03307	0	0	0
25	ENSDARG00000074581	add2	-0.0331774	1.24256	1.03091	0	0	0
25	ENSDARG00000060257	zranb1a	0.0350885	0.771826	1.02466	0	0	0
25	ENSDARG00000105147	osbpl1a	-0.148332	0.805884	1.02317	0	0	0
25	ENSDARG00000068176	uqcc1	-0.234036	0.699916	1.0218	0	0	0
25	ENSDARG00000013741	lancl1	-0.00155158	0.12962	1.01356	0	0	0
25	ENSDARG00000014956	diablob	-0.211768	0.543804	0.975824	0	0	0
25	ENSDARG00000075747	zfyve16	-0.269035	0.681348	0.957018	0	0	0
25	ENSDARG00000046081	bloc1s2	-0.432616	0.517713	0.956604	0	0	0
25	ENSDARG00000040286	ubl7b	-0.0975986	0.256614	0.948858	0	0	0
25	ENSDARG00000021140	pabpc1b	0.0654294	0.603239	0.948532	0	0	0
25	ENSDARG00000088178	tp53inp2	0.0107119	1.35138	0.927655	0	0	0
25	ENSDARG00000096319	si:ch211-239j9.1	0.0828055	0.842184	0.924812	0	0	0
25	ENSDARG00000015057	ube2d4	-0.24073	0.6972	0.91995	0	0	0
25	ENSDARG00000078435	anapc13	-0.186635	0.711235	0.919427	0	0	0
25	ENSDARG00000026988	tbc1d22b	-0.131341	0.402348	0.915161	0	0	0
25	ENSDARG00000115405	hbbe1.2	-0.508656	-0.0695866	0.909577	0	0	0
25	ENSDARG00000032866	erh	-0.0746	0.816669	0.906548	0	0	0
25	ENSDARG00000007081	pias4a	-0.213424	0.47026	0.895509	0	0	0
25	ENSDARG00000006253	mier3a	0.0227841	0.540589	0.891054	0	0	0
25	ENSDARG00000068125	nfu1	0.0362714	0.737874	0.889593	0	0	0
25	ENSDARG00000068366	si:dkey-154p10.3	-0.203495	0.585039	0.886413	0	0	0
25	ENSDARG00000101061	eif2a	-0.00156221	0.342893	0.886056	0	0	0
25	ENSDARG00000111714	BOLA2	-0.327574	0.567244	0.878837	0	0	0
25	ENSDARG00000069920	cox17	-0.126507	0.838644	0.878317	0	0	0
25	ENSDARG00000012840	alg9	-0.400341	0.323126	0.876792	0	0	0
25	ENSDARG00000011770	dhrs12	-0.0297251	-0.102605	0.876238	0	0	0
25	ENSDARG00000013860	ptpmt1	-0.178882	1.04279	0.869531	0	0	0
25	ENSDARG00000074441	gp1bb	-0.323201	0.608744	0.854606	0	0	0
25	ENSDARG00000099339	pacsin3	-0.139897	0.927954	0.853763	0	0	0
25	ENSDARG00000028539	morc2	-0.106567	0.486469	0.838915	0	0	0
25	ENSDARG00000016745	slc35f6	-0.475282	0.126726	0.837269	0	0	0
25	ENSDARG00000092870	BX936337.1	-0.0536136	0.248886	0.829496	0	0	0
25	ENSDARG00000039872	lamtor2	-0.293443	0.688635	0.827493	0	0	0
25	ENSDARG00000037057	gcdha	-0.0661865	0.253861	0.826916	0	0	0
25	ENSDARG00000090194	lamtor5	-0.299168	0.951802	0.82673	0	0	0
25	ENSDARG00000036764	hax1	-0.141464	0.63278	0.822808	0	0	0
25	ENSDARG00000005382	prdm9	0.0252664	0.581292	0.813011	0	0	0
25	ENSDARG00000110836	tmem14ca	-0.260367	0.287707	0.812912	0	0	0
25	ENSDARG00000037259	ndufb6	-0.135642	0.222753	0.806067	0	0	0
25	ENSDARG00000115421	n6amt1	0.0563703	0.828236	0.799944	0	0	0
25	ENSDARG00000059646	nt5dc2	0.186767	1.05133	0.793877	0	0	0
25	ENSDARG00000035907	fam49al	-0.133835	0.720053	0.791511	0	0	0
25	ENSDARG00000012881	slc4a1a	-0.667776	1.65951	0.787895	0	0	0
25	ENSDARG00000087390	hbbe1.3	-0.929918	0.0375634	0.785062	0	0	0
25	ENSDARG00000071570	si:dkeyp-87e7.4	0.0965102	0.570842	0.779244	0	0	0
25	ENSDARG00000089505	bod1l1	-0.105079	0.154498	0.772993	0	0	0
25	ENSDARG00000058226	ak3	0.00560212	0.530137	0.772431	0	0	0
25	ENSDARG00000115222	MARF1	-0.0360039	0.292666	0.772127	0	0	0
25	ENSDARG00000010415	sirt4	-0.0059851	0.247281	0.77193	0	0	0
25	ENSDARG00000068822	purba	0.0309995	0.519297	0.754531	0	0	0
25	ENSDARG00000101915	pin1	-0.0824192	0.646137	0.749832	0	0	0
25	ENSDARG00000025754	ube2f	-0.2094	0.51176	0.744899	0	0	0
25	ENSDARG00000067920	rab8a	-0.203131	0.458203	0.741079	0	0	0
25	ENSDARG00000010918	nprl3	-0.22146	0.564206	0.733841	0	0	0
25	ENSDARG00000044980	kpna6	0.0914164	0.641585	0.732418	0	0	0
25	ENSDARG00000086223	si:ch73-144d13.4	0.0507739	0.834361	0.725995	0	0	0
25	ENSDARG00000043797	cdc5l	-0.112768	0.598314	0.722363	0	0	0
25	ENSDARG00000097573	si:ch211-107e6.5	-0.0123546	-3.38444	0.713422	0	1	0
25	ENSDARG00000105321	aspscr1	0.0867899	0.249755	0.712183	0	0	0
25	ENSDARG00000015123	dnase1l4.1	0.302761	1.09598	0.694067	0	0	0
25	ENSDARG00000039185	nfyba	-0.0436823	0.441175	0.691515	0	0	0
25	ENSDARG00000027078	cnppd1	-0.0222227	0.640579	0.691256	0	0	0
25	ENSDARG00000095224	camkmt	-0.414175	0.313608	0.669929	0	0	0
25	ENSDARG00000073962	ccdc32	-0.108537	0.652293	0.659082	0	0	0
25	ENSDARG00000045355	eloca	-0.16634	-0.517608	0.652886	0	0	0
25	ENSDARG00000096667	hemgn	0.00827201	-0.294463	0.644078	0	0	0
25	ENSDARG00000036592	setd4	-0.0215902	0.502007	0.640218	0	0	0
25	ENSDARG00000038643	alas2	-0.972263	2.66804	0.636155	0	1	0
25	ENSDARG00000006040	cyp20a1	-0.194994	0.583899	0.626845	0	0	0
25	ENSDARG00000039117	tefa	0.156903	-0.323194	0.616983	0	0	0
25	ENSDARG00000043571	KIF2A	0.0780224	0.826921	0.597921	0	0	0
25	ENSDARG00000097489	si:ch73-390p7.2	0.10329	0.331613	0.595082	0	0	0
25	ENSDARG00000096829	blvrb	-0.117993	-0.0293665	0.593856	0	0	0
25	ENSDARG00000029045	peli2	0.0352686	0.157239	0.577414	0	0	0
25	ENSDARG00000101216	meaf6	-0.0275932	0.812169	0.575799	0	0	0
25	ENSDARG00000071173	slc12a10.2	0.275328	1.44345	0.575063	0	0	0
25	ENSDARG00000008218	znf410	0.0491131	-0.0102848	0.573944	0	0	0
25	ENSDARG00000019326	prpsap2	-0.0983455	0.784258	0.572077	0	0	0
25	ENSDARG00000092387	zgc:193742	-0.140789	0.754396	0.561995	0	0	0
25	ENSDARG00000101362	mibp	-0.104105	0.946147	0.557309	0	0	0
25	ENSDARG00000032919	chchd3a	0.053356	0.54455	0.54828	0	0	0
25	ENSDARG00000062148	si:dkey-100n23.3	-0.142637	0.591082	0.545984	0	0	0
25	ENSDARG00000036575	si:ch73-71d17.2	-0.121231	0.28599	0.541873	0	0	0
25	ENSDARG00000004527	pin4	-0.223076	0.407708	0.53099	0	0	0
25	ENSDARG00000039390	sdhaf4	-0.0743239	0.195386	0.522695	0	0	0
25	ENSDARG00000005870	mmadhc	-0.141281	0.339997	0.519142	0	0	0
25	ENSDARG00000062695	ccdc126	-0.0572176	0.29176	0.509506	0	0	0
25	ENSDARG00000020405	napab	-0.0859746	0.251639	0.492498	0	0	0
25	ENSDARG00000092945	si:ch211-250g4.3	0.0803191	0.248895	0.491883	0	0	0
25	ENSDARG00000073867	rex1bd	0.101293	0.552421	0.465817	0	0	0
25	ENSDARG00000042630	hebp2	-0.121075	-0.386959	0.464034	0	0	0
25	ENSDARG00000096917	si:ch211-227m13.1	0.0799251	0.842519	0.462082	0	0	0
25	ENSDARG00000079305	hbae3	-0.488696	0.513273	0.459565	0	0	0
25	ENSDARG00000068562	rbm33a	-0.108087	0.46027	0.458687	0	0	0
25	ENSDARG00000010655	ppm1k	0.0456191	-0.0531065	0.443557	0	0	0
25	ENSDARG00000054220	ap4s1	-0.159398	0.289635	0.443126	0	0	0
25	ENSDARG00000041607	eif4ebp3l	0.388442	0.756724	0.439342	0	0	0
25	ENSDARG00000026655	tspo	0.188559	0.114491	0.43783	0	0	0
25	ENSDARG00000097341	CR847994.1	0.227503	-0.200254	0.43563	0	0	0
25	ENSDARG00000101079	HECTD4	-0.132493	-0.182104	0.432242	0	0	0
25	ENSDARG00000090309	ubxn1	-0.139223	0.570594	0.428813	0	0	0
25	ENSDARG00000019253	rhag	0.19963	0.966492	0.422915	0	0	0
25	ENSDARG00000075165	zc3h6	-0.341159	0.489629	0.416826	0	0	0
25	ENSDARG00000071060	naa10	0.00564511	0.511644	0.407964	0	0	0
25	ENSDARG00000117309	BX927081.3	0.0532637	-2.16508	0.40395	0	1	0
25	ENSDARG00000101790	si:ch73-299h12.3	-0.245632	0.365668	0.370664	0	0	0
25	ENSDARG00000027491	uros	-0.111608	0.174708	0.369957	0	0	0
25	ENSDARG00000052279	osgn1	-0.276515	-0.023697	0.36071	0	0	0
25	ENSDARG00000099764	CR855389.1	0.143442	0.253262	0.359846	0	0	0
25	ENSDARG00000113599	hbbe1.1	-0.363801	0.691886	0.331071	0	0	0
25	ENSDARG00000015352	lsg1	0.0788196	0.700949	0.324729	0	0	0
25	ENSDARG00000032650	fuk	-0.0412342	0.0407714	0.317467	0	0	0
25	ENSDARG00000045372	ngdn	0.390987	0.730824	0.311876	0	0	0
25	ENSDARG00000101844	mibp2	-0.0278792	0.456575	0.294659	0	0	0
25	ENSDARG00000057299	pbdc1	-0.146742	0.626183	0.272374	0	0	0
25	ENSDARG00000073756	slc12a7a	-0.0803737	-0.0924562	0.27044	0	0	0
25	ENSDARG00000089009	frmpd1b	-0.252837	0.124524	0.269223	0	0	0
25	ENSDARG00000029587	msra	0.194518	-0.215875	0.267539	0	0	0
25	ENSDARG00000045143	hbbe2	-0.215107	0.992151	0.251656	0	0	0
25	ENSDARG00000020279	efcab7	-0.26372	0.794565	0.24859	0	0	0
25	ENSDARG00000098350	mxd3	-0.208536	-0.00306844	0.240278	0	0	0
25	ENSDARG00000011376	dnase1l4.2	0.121591	0.310533	0.239377	0	0	0
25	ENSDARG00000062634	kat2b	-0.161624	0.090145	0.236532	0	0	0
25	ENSDARG00000010400	lrrfip2	-0.0374452	0.135549	0.235472	0	0	0
25	ENSDARG00000023583	coq9	0.067741	0.0639807	0.217716	0	0	0
25	ENSDARG00000074889	CT025742.1	-0.152291	0.114737	0.205701	0	0	0
25	ENSDARG00000079947	gfi1b	-0.18044	1.15994	0.188974	0	0	0
25	ENSDARG00000052371	higd2a	-0.0328511	0.394391	0.184588	0	0	0
25	ENSDARG00000040971	zgc:92606	0.0349931	0.714638	0.179307	0	0	0
25	ENSDARG00000003207	mterf3	0.171431	0.424346	0.133076	0	0	0
25	ENSDARG00000017612	pnpo	-0.199845	-0.598973	0.122495	0	0	0
25	ENSDARG00000039915	bola1	-0.149008	0.135717	0.120911	0	0	0
25	ENSDARG00000040314	psph	-0.211449	-0.257421	0.106859	0	0	0
25	ENSDARG00000079391	mrpl42	-0.0761778	0.109816	0.106605	0	0	0
25	ENSDARG00000087277	selenoj	0.0357854	-0.899082	0.084978	0	0	0
25	ENSDARG00000017445	eif3i	0.102181	-0.0220792	0.0839056	0	0	0
25	ENSDARG00000015201	pcmt	-0.0561274	-0.167571	0.0692932	0	0	0
25	ENSDARG00000035256	eef2l2	0.186289	1.34523	0.0601688	0	0	0
25	ENSDARG00000055966	cflara	0.153054	-0.0201631	0.0403561	0	0	0
25	ENSDARG00000038901	tmem256	-0.286575	-0.339021	0.0228428	0	0	0
25	ENSDARG00000076552	zgc:193801	0.0176165	0.167052	0.00423239	0	0	0
25	ENSDARG00000029019	epb41b	-0.0605078	1.28592	-0.0123042	0	0	0
25	ENSDARG00000104450	CR855996.2	-0.029097	-0.180359	-0.0123822	0	0	0
25	ENSDARG00000086184	FBXO48	-0.0237953	-0.0858128	-0.0413313	0	0	0
25	ENSDARG00000042848	pcmtl	0.00961202	0.294628	-0.0588169	0	0	0
25	ENSDARG00000075048	lonrf1	-0.00157966	-1.65836	-0.0643941	0	0	0
25	ENSDARG00000040332	crfb2	-0.16252	0.0894707	-0.0771463	0	0	0
25	ENSDARG00000060153	h6pd	-0.523514	0.330878	-0.0896844	0	0	0
25	ENSDARG00000004167	zgc:110366	-0.0294755	-0.37322	-0.0897621	0	0	0
25	ENSDARG00000003462	fech	-0.337563	-0.433577	-0.108973	0	0	0
25	ENSDARG00000011166	cahz	-0.785931	1.38492	-0.12151	0	0	0
25	ENSDARG00000117617	CABZ01077121.1	0.204774	-0.444347	-0.125028	0	0	0
25	ENSDARG00000043562	zgc:65997	0.208747	-0.678974	-0.129593	0	0	0
25	ENSDARG00000060489	mrpl32	0.0296476	-0.145709	-0.146076	0	0	0
25	ENSDARG00000018146	gpx1a	-0.278129	0.00514012	-0.166582	0	0	0
25	ENSDARG00000007180	slc30a4	-0.186068	-0.421677	-0.190668	0	0	0
25	ENSDARG00000097372	si:ch211-139d20.3	0.278865	0.392468	-0.215584	0	0	0
25	ENSDARG00000077504	si:ch211-103n10.5	-0.0929659	0.9152	-0.2164	0	0	0
25	ENSDARG00000069356	adgrl2a	-0.124481	-0.440847	-0.253232	0	0	0
25	ENSDARG00000004392	hdr	-0.22097	-0.0644807	-0.282247	0	0	0
25	ENSDARG00000100813	nudt12	-0.0929749	-0.477263	-0.297174	0	0	0
25	ENSDARG00000017960	sfxn2	-0.139379	-0.0910573	-0.308685	0	0	0
25	ENSDARG00000057206	nmt1b	-0.153526	0.868969	-0.322737	0	0	0
25	ENSDARG00000102167	ppox	-0.0782189	-0.338498	-0.344284	0	0	0
25	ENSDARG00000045142	hbae5	-0.534735	2.37821	-0.378472	0	1	0
25	ENSDARG00000103946	si:dkey-124l13.1	0.435086	0.460632	-0.421787	0	0	0
25	ENSDARG00000001354	slc6a22.2	-0.20563	0.0906667	-0.425855	0	0	0
25	ENSDARG00000090638	gp9	0.398107	0.0114353	-0.464399	0	0	0
25	ENSDARG00000044550	hif1al2	-0.186963	1.61241	-0.464973	0	0	0
25	ENSDARG00000101146	CR293511.1	-0.153144	0.704779	-0.469962	0	0	0
25	ENSDARG00000095157	zgc:163080	-0.122089	-0.609733	-0.497529	0	0	0
25	ENSDARG00000040277	fbxo32	0.432709	0.268433	-0.551459	0	0	0
25	ENSDARG00000020890	tmod4	0.0324512	-0.885277	-0.619622	0	0	0
25	ENSDARG00000043781	psmb10	-0.519447	-1.03926	-0.66801	0	0	0
25	ENSDARG00000077396	tlcd2	0.224207	-0.450667	-0.735492	0	0	0
25	ENSDARG00000099918	arl4aa	-0.0395313	-0.466816	-0.846868	0	0	0
25	ENSDARG00000103957	aamdc	-0.115109	-1.30122	-0.893395	0	0	0
25	ENSDARG00000018461	zgc:56095	-0.418677	-0.473591	-1.05767	0	0	0
25	ENSDARG00000025350	prdx2	0.226311	-0.485135	-1.07904	0	0	0
25	ENSDARG00000001897	man2b1	-0.0220787	-0.514343	-1.3399	0	0	0
25	ENSDARG00000094215	BX005417.1	0.0247398	1.38076	-1.35462	0	0	0
25	ENSDARG00000040485	gsdmeb	-0.607696	-0.883258	-1.83798	0	0	1
25	ENSDARG00000093006	rarres3	0.110343	-1.4854	-2.16775	0	0	1
25	ENSDARG00000074282	si:ch73-12o23.1	-0.34261	-2.38031	-2.33526	0	1	1
25	ENSDARG00000079393	tmprss15	-0.071168	0.0523378	-3.28216	0	0	1
epidermis
26	ENSDARG00000010250	nqo1	-0.241557	1.60757	3.73274	0	0	1
26	ENSDARG00000103019	gstp2	-0.578837	1.88585	3.07541	0	1	1
26	ENSDARG00000075482	zgc:173587	0.196932	1.2939	3.05524	0	0	1
26	ENSDARG00000036135	bbox1	-0.366379	1.22392	2.87434	0	0	1
26	ENSDARG00000007184	zbtb16a	0.376209	0.892533	2.86358	0	0	1
26	ENSDARG00000097155	GDPGP1	-0.252863	1.21031	2.51105	0	0	1
26	ENSDARG00000079144	bcl2l11	0.0487233	0.810298	2.08648	0	0	1
26	ENSDARG00000053133	b3gnt7l	-0.086812	0.649614	2.06319	0	0	1
26	ENSDARG00000032405	ckap4	0.180203	1.37835	2.06145	0	0	1
26	ENSDARG00000039499	soul2	0.180702	2.06822	2.01067	0	1	1
26	ENSDARG00000036820	mgll	-0.113246	1.45321	1.98142	0	0	1
26	ENSDARG00000098414	ninl	-0.213585	1.28608	1.9314	0	0	1
26	ENSDARG00000061256	si:dkey-44g23.5	-0.123493	1.5361	1.92277	0	0	1
26	ENSDARG00000102081	mprip	0.0477266	0.440143	1.86894	0	0	1
26	ENSDARG00000032496	pon1	0.0300533	0.0800088	1.86748	0	0	1
26	ENSDARG00000098992	zgc:114119	-0.221372	0.794447	1.86232	0	0	1
26	ENSDARG00000030896	foxq1a	0.464947	0.918051	1.85796	0	0	1
26	ENSDARG00000112755	CR394546.4	-0.135042	1.91003	1.83945	0	0	0
26	ENSDARG00000089697	nfe2l2b	0.273962	0.843406	1.73314	0	0	0
26	ENSDARG00000099774	cyb5b	-0.509214	0.452915	1.72576	0	0	0
26	ENSDARG00000068149	tprg1l	-0.402909	-0.160406	1.72489	0	0	0
26	ENSDARG00000100952	wu:fj16a03	0.0422447	2.04447	1.70446	0	1	0
26	ENSDARG00000052905	zgc:165423	-0.301409	2.03394	1.69621	0	1	0
26	ENSDARG00000100409	camlg	-0.0327368	0.469666	1.662	0	0	0
26	ENSDARG00000063031	rad54l2	0.103728	0.0489266	1.64206	0	0	0
26	ENSDARG00000104593	cyp2k18	0.613597	-0.409562	1.59617	0	0	0
26	ENSDARG00000023220	selenot2	-0.207654	1.05872	1.58695	0	0	0
26	ENSDARG00000003035	hspa9	-0.15829	1.46575	1.55494	0	0	0
26	ENSDARG00000023279	psmd4b	-0.234773	1.05628	1.54435	0	0	0
26	ENSDARG00000113454	CABZ01068600.1	0.0570219	0.442004	1.54088	0	0	0
26	ENSDARG00000027279	numb	0.0876979	0.412723	1.47919	0	0	0
26	ENSDARG00000111240	dhrs13a.2	0.968671	2.11889	1.47439	0	1	0
26	ENSDARG00000007786	tmx2b	-0.160307	1.0004	1.44486	0	0	0
26	ENSDARG00000097973	si:ch1073-190k2.1	-0.136638	4.02552	1.43502	0	1	0
26	ENSDARG00000073870	gdpd2	0.313627	1.28148	1.43382	0	0	0
26	ENSDARG00000079979	fam89a	-0.149014	0.684465	1.41221	0	0	0
26	ENSDARG00000070284	sft2d3	0.0341074	0.452894	1.38409	0	0	0
26	ENSDARG00000062372	nrd1b	-0.359182	0.883729	1.37907	0	0	0
26	ENSDARG00000010023	CU856539.1	-0.365284	1.26471	1.37631	0	0	0
26	ENSDARG00000100826	hif1al	0.159403	0.759876	1.3685	0	0	0
26	ENSDARG00000098108	dusp2	0.333067	0.407681	1.36507	0	0	0
26	ENSDARG00000016691	cd9b	0.00352855	1.41174	1.34252	0	0	0
26	ENSDARG00000024651	snrpa1	-0.0611877	0.724321	1.34013	0	0	0
26	ENSDARG00000021177	cept1b	-0.347533	0.820626	1.32607	0	0	0
26	ENSDARG00000037229	denr	-0.299594	1.05209	1.32511	0	0	0
26	ENSDARG00000101317	grinaa	-0.143234	1.80612	1.32104	0	1	0
26	ENSDARG00000023852	lsm4	-0.259557	0.77947	1.31854	0	0	0
26	ENSDARG00000097122	AL772382.1	-0.353227	0.994488	1.31515	0	0	0
26	ENSDARG00000014138	acot8	-0.513955	-0.47788	1.31007	0	0	0
26	ENSDARG00000037963	nek6	-0.0985554	0.975341	1.30312	0	0	0
26	ENSDARG00000007682	ppdpfa	0.225277	1.02898	1.29632	0	0	0
26	ENSDARG00000088246	thoc1	-0.129632	0.876385	1.2854	0	0	0
26	ENSDARG00000101181	s100w	-0.0557132	1.11595	1.26035	0	0	0
26	ENSDARG00000015563	zgc:123305	-0.198524	0.504995	1.23888	0	0	0
26	ENSDARG00000052606	dpp9	-0.262559	0.972521	1.23329	0	0	0
26	ENSDARG00000092726	si:dkey-184p9.7	0.438734	0.860047	1.21371	0	0	0
26	ENSDARG00000008310	ip6k2a	0.197961	0.762492	1.20745	0	0	0
26	ENSDARG00000102643	chmp1a	-0.163565	0.328565	1.19153	0	0	0
26	ENSDARG00000042954	slc17a9a	0.319968	2.21362	1.18262	0	1	0
26	ENSDARG00000101413	dusp7	-0.347641	-0.287585	1.17826	0	0	0
26	ENSDARG00000069314	tmem199	-0.548452	1.10031	1.17141	0	0	0
26	ENSDARG00000070698	kbtbd8	-0.129159	0.570977	1.17112	0	0	0
26	ENSDARG00000040443	polr2i	-0.315867	1.11117	1.145	0	0	0
26	ENSDARG00000098583	wbp1	-0.0838894	0.381835	1.14135	0	0	0
26	ENSDARG00000032188	lrrc8aa	0.0951464	0.892335	1.13766	0	0	0
26	ENSDARG00000006408	hmgb3b	-0.0241217	0.710127	1.12483	0	0	0
26	ENSDARG00000029928	ap3m1	-0.219219	0.706289	1.12222	0	0	0
26	ENSDARG00000069505	zgc:136892	-0.0197556	1.85428	1.1198	0	1	0
26	ENSDARG00000059843	fam135a	0.0310506	0.579936	1.11168	0	0	0
26	ENSDARG00000063014	dbpa	0.388821	1.08876	1.10969	0	0	0
26	ENSDARG00000005927	tbc1d17	-0.0501648	0.635917	1.10462	0	0	0
26	ENSDARG00000099972	nup153	0.0263663	0.537084	1.09706	0	0	0
26	ENSDARG00000063416	ptprk	0.159731	0.971752	1.09236	0	0	0
26	ENSDARG00000061207	ttc7b	-0.00378822	0.843555	1.08884	0	0	0
26	ENSDARG00000061896	slco2a1	0.0966282	-0.407254	1.08469	0	0	0
26	ENSDARG00000018814	esrp2	-0.00263065	0.157774	1.08228	0	0	0
26	ENSDARG00000058208	slc25a26	-0.0507874	0.712669	1.07702	0	0	0
26	ENSDARG00000062352	sema4ab	-0.129116	0.893224	1.07499	0	0	0
26	ENSDARG00000077709	iqsec2b	-0.0450962	-0.108649	1.07471	0	0	0
26	ENSDARG00000036876	zgc:153284	-0.618152	0.491455	1.06911	0	0	0
26	ENSDARG00000069192	zgc:163030	0.107869	1.1705	1.06139	0	0	0
26	ENSDARG00000058693	cast	0.276468	0.516722	1.04785	0	0	0
26	ENSDARG00000002967	pdap1b	-0.0739085	1.12074	1.02802	0	0	0
26	ENSDARG00000098726	rptor	-0.161975	0.55062	1.02132	0	0	0
26	ENSDARG00000099640	eed	-0.181851	0.600048	1.02036	0	0	0
26	ENSDARG00000099950	cldn17	0.185112	0.823065	0.987364	0	0	0
26	ENSDARG00000056885	per1a	0.5635	0.740029	0.986998	0	0	0
26	ENSDARG00000105389	mmel1	0.340423	1.54127	0.985911	0	0	0
26	ENSDARG00000062268	jarid2b	-0.0606856	0.0050949	0.979952	0	0	0
26	ENSDARG00000020488	arhgap17a	-0.1964	0.614298	0.974982	0	0	0
26	ENSDARG00000088885	si:ch1073-340i21.3	0.885207	0.425678	0.962932	0	0	0
26	ENSDARG00000116608	pitx1	0.0393766	0.821413	0.962273	0	0	0
26	ENSDARG00000001898	manea	-0.279672	0.394932	0.958852	0	0	0
26	ENSDARG00000045606	alkbh3	-0.245172	0.397206	0.938919	0	0	0
26	ENSDARG00000025555	ormdl3	-0.0258284	0.116593	0.938168	0	0	0
26	ENSDARG00000102146	si:ch211-69b7.6	0.522327	1.18842	0.926351	0	0	0
26	ENSDARG00000010113	ndufb8	-0.194247	0.490442	0.922705	0	0	0
26	ENSDARG00000113977	fthl29	0.326162	0.0578091	0.90321	0	0	0
26	ENSDARG00000007362	sft2d1	-0.357399	0.700147	0.895625	0	0	0
26	ENSDARG00000089936	selenow2b	0.224066	1.76156	0.894951	0	1	0
26	ENSDARG00000075340	med1	-0.174394	0.597983	0.890559	0	0	0
26	ENSDARG00000024116	vamp8	-0.0856935	1.50088	0.889493	0	0	0
26	ENSDARG00000022187	usp6nl	-0.0557841	0.308547	0.884481	0	0	0
26	ENSDARG00000101190	cyp2k8	-0.229268	0.346477	0.880108	0	0	0
26	ENSDARG00000102822	pam16	-0.0188587	0.511915	0.876688	0	0	0
[truncated: 182 more rows]

## Sheet: enterocytes (4,9,16,17)
enterocytes (segment 1)	ensembl_gene_id	gene	hnf4gCV2.vs.WTCV2 log2	hnf4aCV1.vs.WTCV1 log2	hnf4a_hnf4gCR3.vs.WTCR3 log2	hnf4gCV2.vs.WTCV2 significant	hnf4aCV1.vs.WTCV1 significant	hnf4a_hnf4gCR3.vs.WTCR3 significant		enterocytes (segment 3, pronephric ducts?)	ensembl_gene_id	gene	hnf4gCV2.vs.WTCV2 log2	hnf4aCV1.vs.WTCV1 log2	hnf4a_hnf4gCR3.vs.WTCR3 log2	hnf4gCV2.vs.WTCV2 significant	hnf4aCV1.vs.WTCV1 significant	hnf4a_hnf4gCR3.vs.WTCR3 significant		enterocytes (segment 1 precursors?)	ensembl_gene_id	gene	hnf4gCV2.vs.WTCV2 log2	hnf4aCV1.vs.WTCV1 log2	hnf4a_hnf4gCR3.vs.WTCR3 log2	hnf4gCV2.vs.WTCV2 significant	hnf4aCV1.vs.WTCV1 significant	hnf4a_hnf4gCR3.vs.WTCR3 significant		enterocytes (segment 2)	ensembl_gene_id	gene	hnf4gCV2.vs.WTCV2 log2	hnf4aCV1.vs.WTCV1 log2	hnf4a_hnf4gCR3.vs.WTCR3 log2	hnf4gCV2.vs.WTCV2 significant	hnf4aCV1.vs.WTCV1 significant	hnf4a_hnf4gCR3.vs.WTCR3 significant
4	ENSDARG00000036239	gatm	-0.0845093	0.0847568	2.5012	0	0	1		9	ENSDARG00000058206	si:ch211-153b23.5	-1.39622	0.949966	1.9681	0	0	1		16	ENSDARG00000116654	si:dkey-261m9.6	-0.823806	-1.26512	1.98782	0	0	1		17	ENSDARG00000044098	egr2a	-0.166032	0.654129	3.00229	0	0	1
4	ENSDARG00000013522	pck1	0.301862	0.18988	2.30736	0	0	1		9	ENSDARG00000096888	serpinb1l4	0.379121	1.30019	1.63169	0	0	0		16	ENSDARG00000109370	hist1h2ba	1.20402	0.10255	1.91507	0	0	1		17	ENSDARG00000059651	cidec	-0.0100343	0.596217	1.48598	0	0	0
4	ENSDARG00000038106	slc37a4a	-0.131421	-0.0513537	0.592465	0	0	0		9	ENSDARG00000117669	CABZ01087025.3	0.474414	1.09886	1.6135	0	0	0		16	ENSDARG00000094154	hist2h3c	-0.491478	0.306212	3.66651	0	0	1		17	ENSDARG00000053467	gtpbp1	-0.399994	2.56508	1.41183	0	1	0
4	ENSDARG00000000069	dap	0.193036	-0.288367	0.582239	0	0	0		9	ENSDARG00000099124	f3a	-0.114727	1.44489	1.58798	0	0	0		16	ENSDARG00000094204	elp1	-0.122062	0.322455	0.669089	0	0	0		17	ENSDARG00000022295	hnf1bb	-0.248682	0.416439	1.20862	0	0	0
4	ENSDARG00000044751	ddt	0.0503499	-0.0918128	0.536412	0	0	0		9	ENSDARG00000099717	si:rp71-1h20.9	-0.173147	1.0831	1.56125	0	0	0		16	ENSDARG00000097102	si:ch73-281n10.2	-0.330788	0.562102	0.966081	0	0	0		17	ENSDARG00000055647	ftr82	-0.0610116	0.100387	0.757743	0	0	0
4	ENSDARG00000012076	apoa1a	0.286641	-0.296379	0.376656	0	0	0		9	ENSDARG00000030094	malb	0.058114	0.584785	1.46243	0	0	0		16	ENSDARG00000052103	dtymk	-0.73106	0.615144	1.9923	0	0	1		17	ENSDARG00000002494	itgb6	-0.1515	0.31882	0.743009	0	0	0
4	ENSDARG00000005713	ethe1	-0.100767	-0.536089	0.213276	0	0	0		9	ENSDARG00000096616	si:ch211-255p10.3	0.341728	1.9561	1.24919	0	1	0		16	ENSDARG00000033012	pcnt	-0.219742	0.655133	1.50697	0	0	0		17	ENSDARG00000070346	hoxc8a	0.066381	1.21691	0.737628	0	0	0
4	ENSDARG00000014794	uqcrc2a	-0.0738997	0.365418	0.212244	0	0	0		9	ENSDARG00000073820	zgc:174917	-1.41952	1.33712	1.2421	0	0	0		16	ENSDARG00000077822	si:dkey-6i22.5	-0.979987	0.698137	2.12002	0	0	1		17	ENSDARG00000044769	kctd13	-0.14691	0.164415	0.672738	0	0	0
4	ENSDARG00000043848	sod1	-0.0140323	-0.442516	0.204826	0	0	0		9	ENSDARG00000104919	si:ch211-153b23.3	-2.05478	1.29504	1.16332	0	0	0		16	ENSDARG00000071670	tma7	-0.361874	0.802154	1.12085	0	0	0		17	ENSDARG00000053625	anxa2b	-0.182015	-0.184525	0.399724	0	0	0
4	ENSDARG00000045230	cox6b1	-0.403054	0.571149	0.126209	0	0	0		9	ENSDARG00000091658	sptssb	0.306369	0.740558	1.15909	0	0	0		16	ENSDARG00000070019	taf15	-0.436754	0.816335	1.0195	0	0	0		17	ENSDARG00000063538	kalrnb	0.0977471	-0.299998	0.344071	0	0	0
4	ENSDARG00000092170	apoc1	-0.260025	-0.253312	-0.0399264	0	0	0		9	ENSDARG00000102115	ndufc2	-0.273197	0.563699	0.94753	0	0	0		16	ENSDARG00000113969	supt4h1	-0.224313	0.876367	0.98938	0	0	0		17	ENSDARG00000035869	azin1b	0.0500322	0.0919641	0.204122	0	0	0
4	ENSDARG00000093044	si:ch211-161h7.5	0.624423	-0.340121	-0.0404733	0	0	0		9	ENSDARG00000052859	chp1	-0.15424	0.261336	0.944357	0	0	0		16	ENSDARG00000106529	dut	-0.281137	0.883311	2.67131	0	0	1		17	ENSDARG00000032849	ndrg1a	-0.128385	1.21904	0.151601	0	0	0
4	ENSDARG00000052712	suclg1	-0.0507925	-0.213311	-0.104138	0	0	0		9	ENSDARG00000062788	irg1l	-1.76323	1.11869	0.923803	0	0	0		16	ENSDARG00000029722	hmgb2a	0.0239029	1.04135	0.964483	0	0	0		17	ENSDARG00000056226	creb3l3a	0.00522037	-0.207638	-0.10176	0	0	0
4	ENSDARG00000043511	prdx6	-0.322169	-0.57302	-0.196521	0	0	0		9	ENSDARG00000060109	aggf1	-0.0257205	0.741824	0.863027	0	0	0		16	ENSDARG00000038386	ascl1a	-0.579492	1.04202	1.36738	0	0	0		17	ENSDARG00000013721	g6pca.2	-0.229314	0.113479	-0.261672	0	0	0
4	ENSDARG00000044914	suclg2	-0.161114	-0.253316	-0.312224	0	0	0		9	ENSDARG00000090444	ponzr1	-0.432376	0.470689	0.861143	0	0	0		16	ENSDARG00000089291	cenpx	-0.873725	1.0842	2.24826	0	0	1		17	ENSDARG00000061274	lss	-0.291631	-0.503014	-0.349302	0	0	0
4	ENSDARG00000101324	apoa1b	-0.195137	-0.346051	-0.317974	0	0	0		9	ENSDARG00000038577	cox6c	-0.114023	0.424771	0.835324	0	0	0		16	ENSDARG00000091150	mki67	-0.863399	1.10647	2.09359	0	0	1		17	ENSDARG00000062096	pm20d1.2	0.206756	-0.172827	-0.40998	0	0	0
4	ENSDARG00000016649	akr7a3	-0.286815	-0.258995	-0.318047	0	0	0		9	ENSDARG00000004692	nabp1a	-0.422222	1.02726	0.670262	0	0	0		16	ENSDARG00000053990	hmgb2b	-0.432191	1.16545	0.935216	0	0	0		17	ENSDARG00000039150	lgmn	-0.377379	0.0720678	-0.527518	0	0	0
4	ENSDARG00000041068	got2a	-0.00887099	-0.0933525	-0.393738	0	0	0		9	ENSDARG00000089307	pmaip1	0.195181	-0.453546	0.668423	0	0	0		16	ENSDARG00000004169	stmn1a	-0.667104	1.24126	1.42304	0	0	0		17	ENSDARG00000014916	slc10a2	-0.0672715	-1.13825	-0.571791	0	0	0
4	ENSDARG00000035882	rida	0.163605	-1.24685	-0.553885	0	0	0		9	ENSDARG00000006840	gnmt	-0.156047	0.289813	0.668286	0	0	0		16	ENSDARG00000062152	chaf1a	-0.673926	1.27269	1.88948	0	0	1		17	ENSDARG00000074852	myo15b	0.0414633	-0.368443	-0.657541	0	0	0
4	ENSDARG00000025375	idh1	0.40957	-0.56549	-0.568005	0	0	0		9	ENSDARG00000078674	hspb9	-0.0724535	1.39574	0.668243	0	0	0		16	ENSDARG00000053950	lin37	-0.133142	1.29083	1.7502	0	0	1		17	ENSDARG00000043009	fam43a	0.0395044	0.165257	-0.672426	0	0	0
4	ENSDARG00000015662	pla2g12b	0.344572	-0.593148	-0.62805	0	0	0		9	ENSDARG00000095897	atp5f1e	0.0263812	0.26761	0.571544	0	0	0		16	ENSDARG00000097691	pclaf	-0.705904	1.32913	2.48561	0	0	1		17	ENSDARG00000096359	eppk1	0.221083	-0.433889	-0.754356	0	0	0
4	ENSDARG00000012903	slc34a2a	0.387812	0.0924625	-0.727687	0	0	0		9	ENSDARG00000060622	si:ch73-14h1.2	-0.406768	0.668944	0.200181	0	0	0		16	ENSDARG00000099572	hmgn2	-0.395895	1.34888	1.3751	0	0	0		17	ENSDARG00000068181	dpep1	-0.226506	-0.630089	-0.876816	0	0	0
4	ENSDARG00000102249	pepd	-0.0519961	-0.506964	-0.741968	0	0	0		9	ENSDARG00000056012	eve1	-0.347441	-0.111647	-0.663515	0	0	0		16	ENSDARG00000071410	cks2	-0.86054	1.37639	2.05426	0	0	1		17	ENSDARG00000041797	cx28.9	0.274134	-0.759999	-0.913793	0	0	0
4	ENSDARG00000001870	atp1a1a.4	0.442699	-0.283233	-0.752869	0	0	0		9	ENSDARG00000103639	si:dkey-36i7.3	0.0897124	-0.660081	-1.23775	0	0	0		16	ENSDARG00000102594	zgc:194627	-0.850519	1.45849	2.52802	0	0	1		17	ENSDARG00000089362	grn1	-0.676368	-0.740264	-0.945074	0	0	0
4	ENSDARG00000024278	adh8b	0.380464	-0.510937	-0.794419	0	0	0		9	ENSDARG00000074754	si:dkey-188i13.9	0.072441	-2.99236	-3.46784	0	1	1		16	ENSDARG00000040110	kif20bb	-0.947856	1.50501	2.0318	0	0	1		17	ENSDARG00000009653	lhfpl2a	-0.107984	-1.20438	-1.08338	0	0	0
4	ENSDARG00000023820	faxdc2	0.143073	-0.339689	-0.85087	0	0	0		9	ENSDARG00000093619	sult3st2	-0.624037	-0.921067	-4.36335	0	0	1		16	ENSDARG00000058479	zgc:110425	-0.895761	1.50796	0.00697582	0	0	0		17	ENSDARG00000105714	CABZ01083442.1	-0.0847756	-0.844807	-1.14199	0	0	0
4	ENSDARG00000101074	glud1b	0.139576	-0.564904	-0.89745	0	0	0												16	ENSDARG00000062187	kif14	-0.429955	1.53051	1.95701	0	0	1		17	ENSDARG00000002210	stk25a	-0.322193	0.0875228	-1.36894	0	0	0
4	ENSDARG00000022767	apobb.1	0.105876	-1.51423	-0.997436	0	0	0												16	ENSDARG00000100279	CU457819.1	-0.0712385	1.56088	0.91048	0	0	0		17	ENSDARG00000097193	si:dkey-28n18.9	-0.441456	-0.784469	-1.43207	0	0	0
4	ENSDARG00000068478	gpx4a	-0.0443729	-1.58237	-1.061	0	0	0												16	ENSDARG00000024488	top2a	-0.84321	1.62235	2.30307	0	0	1		17	ENSDARG00000013730	slc4a4a	-0.436511	0.391047	-1.44382	0	0	0
4	ENSDARG00000005191	ahcy	0.0918904	-0.846376	-1.06286	0	0	0												16	ENSDARG00000076228	kif2c	-0.836989	1.63801	2.02792	0	0	1		17	ENSDARG00000000212	krt97	0.105167	-0.875662	-1.68921	0	0	0
4	ENSDARG00000056108	ndufa4	-1.18783	1.07989	-1.09988	0	0	0												16	ENSDARG00000045167	dlgap5	-0.725769	1.67191	2.2272	0	0	1		17	ENSDARG00000031761	dab2	-0.299929	-0.485072	-1.85883	0	0	1
4	ENSDARG00000043257	ckbb	-0.0252002	-1.06503	-1.21309	0	0	0												16	ENSDARG00000034624	nuf2	-1.07323	1.68246	2.24242	0	0	1		17	ENSDARG00000103266	ogal	-0.214991	-0.947713	-1.98321	0	0	1
4	ENSDARG00000039007	eno3	-0.00892265	-0.38293	-1.25442	0	0	0												16	ENSDARG00000099194	CABZ01058261.1	-0.857488	1.71233	2.22827	0	0	1		17	ENSDARG00000044566	fabp6	0.172855	-1.38538	-2.00464	0	0	1
4	ENSDARG00000092155	apoc2	-0.140283	-2.81048	-1.30307	0	1	0												16	ENSDARG00000043137	cdca8	-0.883608	1.71441	2.15887	0	0	1		17	ENSDARG00000002986	gda	0.00842745	-1.14088	-2.03367	0	0	1
4	ENSDARG00000017772	mdh1aa	0.331239	-0.785014	-1.48525	0	0	0												16	ENSDARG00000037640	aurkb	-0.85964	1.78416	2.24944	0	1	1		17	ENSDARG00000056781	zanl	0.0621467	-0.939106	-2.18781	0	0	1
4	ENSDARG00000070844	gamt	0.18902	-1.80116	-1.52216	0	1	0												16	ENSDARG00000103907	sgo1	-0.918614	1.79188	2.72276	0	1	1		17	ENSDARG00000079647	muc13b	-0.406313	-0.303043	-2.56644	0	0	1
4	ENSDARG00000105187	gcshb	0.0664556	-0.407712	-1.57108	0	0	0												16	ENSDARG00000103996	spdl1	-0.916924	1.80039	2.06207	0	1	1		17	ENSDARG00000007040	tmigd1	0.047253	-1.809	-2.8726	0	1	1
4	ENSDARG00000098645	rgn	-0.319337	-1.33193	-1.58349	0	0	0												16	ENSDARG00000100573	ckap2l	-0.7337	1.83752	2.25251	0	1	1		17	ENSDARG00000098805	vwa11	-0.362488	-0.891876	-3.22415	0	0	1
4	ENSDARG00000053853	slc13a2	0.215784	-0.955004	-1.68605	0	0	0												16	ENSDARG00000070109	ncapg	-0.80486	1.8536	2.13357	0	1	1		17	ENSDARG00000104047	si:ch211-262i1.3	-0.271497	-0.491271	-3.7156	0	0	1
4	ENSDARG00000104347	rtn4b	0.172399	-1.34272	-1.7845	0	0	1												16	ENSDARG00000102483	numa1	-0.510403	1.88861	1.57979	0	1	0		17	ENSDARG00000101051	ctsbb	-0.40843	-1.6679	-4.66355	0	0	1
4	ENSDARG00000071592	aqp8a.2	0.0213188	-0.650563	-2.05573	0	0	1												16	ENSDARG00000058471	plk1	-0.842916	1.90399	2.18599	0	1	1		17	ENSDARG00000003902	ctsl.1	-0.385205	-0.978479	-4.67957	0	0	1
4	ENSDARG00000003113	ada	0.187972	-0.719149	-2.08728	0	0	1												16	ENSDARG00000051923	ccnb1	-0.964063	1.93482	2.31817	0	1	1		17	ENSDARG00000005704	eps8l3b	-0.395116	0.090592	-5.50786	0	0	1
4	ENSDARG00000043457	gapdh	0.0932969	-0.876224	-2.11342	0	0	1												16	ENSDARG00000005274	rad52	-0.297604	1.98004	1.96264	0	1	1		17	ENSDARG00000097683	sptbn5	-0.874103	-1.58325	-6.05814	0	0	1
4	ENSDARG00000103785	sult2st2	0.308942	-1.4578	-2.23865	0	0	1												16	ENSDARG00000063385	cenpe	-1.10408	2.08597	2.4074	0	1	1		17	ENSDARG00000007906	lrp2b	-0.982026	-1.34901	-6.58142	0	0	1
4	ENSDARG00000070057	si:dkey-69o16.5	0.113563	-1.29375	-2.37737	0	0	1												16	ENSDARG00000105350	si:ch1073-153i20.4	-1.03273	2.16473	1.47731	0	0	0		17	ENSDARG00000096739	si:dkey-219e21.2	-0.151641	-0.638047	-6.7803	0	0	1
4	ENSDARG00000061858	zgc:153968	-0.0409143	-1.90775	-2.41196	0	1	1												16	ENSDARG00000100019	arhgap11a	-1.14626	2.16526	2.26449	0	1	1		17	ENSDARG00000105522	si:ch211-196f2.3	-0.0917638	-0.466631	-8.52538	0	0	1
4	ENSDARG00000035544	etnppl	0.00311306	-1.65105	-2.5159	0	0	1												16	ENSDARG00000083189	arhgap19	-0.358354	2.17058	2.39264	0	1	1
4	ENSDARG00000040298	apoa4b.1	0.225132	-1.28892	-2.5293	0	0	1												16	ENSDARG00000007971	cks1b	-1.06873	2.17176	2.09483	0	1	1
4	ENSDARG00000012194	scp2a	0.116236	-1.57417	-2.61961	0	0	1												16	ENSDARG00000078433	spc25	-0.307848	2.19589	2.36444	0	1	1
4	ENSDARG00000037307	gnpda1	-0.350172	-0.891469	-2.65029	0	0	1												16	ENSDARG00000086112	si:ch211-266i6.3	-0.700487	2.21762	2.69278	0	1	1
4	ENSDARG00000105351	si:ch211-113d11.6	0.00695168	-0.0334265	-3.35236	0	0	1												16	ENSDARG00000075621	birc5a	-0.81294	2.26102	2.35871	0	1	1
4	ENSDARG00000003615	slc26a3.2	-0.158137	-0.699782	-3.35283	0	0	1
4	ENSDARG00000020364	fbp1b	0.185878	-1.0676	-3.42911	0	0	1
4	ENSDARG00000042428	gstt1a	0.385115	-1.72171	-3.43712	0	0	1
4	ENSDARG00000025595	agmo	0.132234	-1.02968	-3.64627	0	0	1
4	ENSDARG00000018459	msrb2	-0.311577	-1.95795	-3.64646	0	1	1
4	ENSDARG00000056203	si:ch211-201h21.5	-0.184619	-0.672353	-3.86994	0	0	1
4	ENSDARG00000056719	slc6a19b	0.654451	-0.422874	-3.95003	0	0	1
4	ENSDARG00000006811	sult1st6	-0.100476	-1.61223	-4.02109	0	0	1
4	ENSDARG00000006427	fabp2	0.364507	-3.27675	-4.06327	0	1	1
4	ENSDARG00000061355	aoc1	-0.0156275	-1.34707	-4.06926	0	0	1
4	ENSDARG00000101557	scarb1	0.462449	-2.24031	-4.10954	0	1	1
4	ENSDARG00000102004	apoea	0.0252297	-5.02891	-4.37584	0	1	1
4	ENSDARG00000099185	chia.2	0.0841835	-1.51649	-4.45633	0	0	1
4	ENSDARG00000070038	rbp2a	0.472897	-2.40373	-5.10466	0	1	1
4	ENSDARG00000022261	pdzk1	0.328639	-1.28131	-5.26075	0	0	1
4	ENSDARG00000012640	cideb	0.0785351	-1.16603	-5.47679	0	0	1
4	ENSDARG00000059227	fabp1b.1	0.18699	-2.34671	-5.49688	0	1	1
4	ENSDARG00000032639	cd36	0.27212	-1.00564	-5.60197	0	0	1
4	ENSDARG00000018361	sult1st3	0.0671251	-2.88774	-6.10293	0	1	1
4	ENSDARG00000095633	si:ch211-133l5.7	0.105015	-0.875945	-6.20686	0	0	1
4	ENSDARG00000053526	enpp7.1	-0.114128	-1.20948	-6.23569	0	0	1
4	ENSDARG00000019532	fads2	1.36582	-6.36079	-6.45053	0	1	1
4	ENSDARG00000068220	mbl2	-0.851475	-0.859787	-6.46394	0	0	1
4	ENSDARG00000017882	rdh1	0.17362	-2.1073	-6.89045	0	1	1
4	ENSDARG00000045414	elovl2	0.586829	-5.70663	-7.24918	0	1	1
4	ENSDARG00000089919	si:ch211-161h7.8	-0.699942	-1.68535	-7.33125	0	0	1
4	ENSDARG00000029747	mep1a.1	0.133697	-2.33323	-8.40165	0	1	1
4	ENSDARG00000019228	mogat2	0.462418	-2.08274	-10.9642	0	1	1
4	ENSDARG00000100635	chia.1	-0.275169	-2.84045	-12.4269	0	1	1

## Sheet: goblet cells (3,13,14)
goblet cells	ensembl_gene_id	gene	hnf4gCV2.vs.WTCV2 log2	hnf4aCV1.vs.WTCV1 log2	hnf4a_hnf4gCR3.vs.WTCR3 log2	hnf4gCV2.vs.WTCV2 significant	hnf4aCV1.vs.WTCV1 significant	hnf4a_hnf4gCR3.vs.WTCR3 significant		goblet cells	ensembl_gene_id	gene	hnf4gCV2.vs.WTCV2 log2	hnf4aCV1.vs.WTCV1 log2	hnf4a_hnf4gCR3.vs.WTCR3 log2	hnf4gCV2.vs.WTCV2 significant	hnf4aCV1.vs.WTCV1 significant	hnf4a_hnf4gCR3.vs.WTCR3 significant		goblet cells	ensembl_gene_id	gene	hnf4gCV2.vs.WTCV2 log2	hnf4aCV1.vs.WTCV1 log2	hnf4a_hnf4gCR3.vs.WTCR3 log2	hnf4gCV2.vs.WTCV2 significant	hnf4aCV1.vs.WTCV1 significant	hnf4a_hnf4gCR3.vs.WTCR3 significant
3	ENSDARG00000007377	odc1	0.101608	2.24036	4.2227	0	1	1		13	ENSDARG00000075626	zgc:172090	-0.417799	7.71148	1.02597	0	1	0		14	ENSDARG00000059308	golt1bb	-0.574816	1.90358	2.97666	0	1	1
3	ENSDARG00000099091	CU929418.1	1.03447	2.54952	3.43356	0	1	1		13	ENSDARG00000017446	camk1db	0.00708782	2.65118	2.39588	0	1	1		14	ENSDARG00000070480	agr2	-0.56627	1.39191	2.30568	0	0	1
3	ENSDARG00000075436	sytl2b	0.0596029	0.745325	2.48166	0	0	1		13	ENSDARG00000044261	si:ch211-243g18.2	-0.147407	2.20176	0.930626	0	1	0		14	ENSDARG00000105118	zgc:171566	-0.0584935	2.80797	2.00364	0	1	1
3	ENSDARG00000010641	slc20a1b	0.186809	1.29405	2.28019	0	0	1		13	ENSDARG00000068168	hes2.2	-0.116893	2.13296	1.99016	0	0	1		14	ENSDARG00000104721	si:dkey-203a12.9	-0.22897	1.86221	1.78473	0	1	1
3	ENSDARG00000004402	elovl6	-0.379351	3.0352	2.15597	0	1	1		13	ENSDARG00000101429	si:ch73-208h1.1	-0.895159	1.95775	0.670168	0	1	0		14	ENSDARG00000037746	actb1	-0.258125	0.988715	1.70622	0	0	0
3	ENSDARG00000031506	flvcr2b	-0.330677	0.570149	1.94213	0	0	1		13	ENSDARG00000019063	fat1b	0.235809	1.95757	1.24329	0	1	0		14	ENSDARG00000024954	tmed4	-0.235779	1.09475	1.67537	0	0	0
3	ENSDARG00000076250	rasef	0.0079122	0.112103	1.9236	0	0	1		13	ENSDARG00000035178	gna14	-0.165197	1.9294	0.300122	0	1	0		14	ENSDARG00000056600	papss2b	-0.271494	1.36081	1.57126	0	0	0
3	ENSDARG00000077540	f2rl1.2	0.108552	1.30706	1.9019	0	0	1		13	ENSDARG00000057610	cdkn2c	-0.500025	1.91784	1.69525	0	1	0		14	ENSDARG00000044304	prrc1	-0.308641	0.844995	1.39811	0	0	0
3	ENSDARG00000093864	wee1	-0.517592	0.519437	1.80069	0	0	1		13	ENSDARG00000041292	si:ch211-231m23.4	-0.439775	1.85233	4.77688	0	1	1		14	ENSDARG00000029663	rab1ab	-0.265753	0.775389	1.21806	0	0	0
3	ENSDARG00000037154	hivep3b	0.104229	1.22093	1.75953	0	0	1		13	ENSDARG00000037782	sox8b	-0.12612	1.84219	3.22395	0	1	1		14	ENSDARG00000017658	gmppb	-0.21034	0.938873	1.17698	0	0	0
3	ENSDARG00000042874	phlda2	-0.620145	1.08627	1.61098	0	0	0		13	ENSDARG00000098463	gig2g	-0.757749	1.84	-3.40579	0	0	1		14	ENSDARG00000018404	krt18a.1	-0.241173	1.38492	1.16072	0	0	0
3	ENSDARG00000003381	si:ch211-266g18.6	0.0857959	1.15114	1.57945	0	0	0		13	ENSDARG00000069504	si:dkey-88e18.2	-0.633522	1.83993	1.28294	0	1	0		14	ENSDARG00000018562	cope	-0.275305	0.513265	1.14726	0	0	0
3	ENSDARG00000099186	slc1a5	0.0946224	1.53059	1.48328	0	0	0		13	ENSDARG00000098377	tnfrsf11b	-0.532303	1.73481	0.99564	0	0	0		14	ENSDARG00000002401	gale	-0.726205	0.765404	1.06196	0	0	0
3	ENSDARG00000032627	SCYL2	-0.0348834	1.04663	1.40679	0	0	0		13	ENSDARG00000052115	ehf	-0.446126	1.6972	3.22688	0	0	1		14	ENSDARG00000075718	rpz5	-0.150623	1.58309	1.04214	0	0	0
3	ENSDARG00000013763	rrbp1a	-0.17627	-0.182908	1.32265	0	0	0		13	ENSDARG00000068621	si:ch211-181d7.3	0.0581465	1.56899	0.0488819	0	0	0		14	ENSDARG00000056152	fam3c	0.0503708	1.00622	1.00895	0	0	0
3	ENSDARG00000035676	ptp4a2b	-0.206402	0.818131	1.31275	0	0	0		13	ENSDARG00000053488	si:ch73-22a13.3	-0.269266	1.56566	0.510447	0	0	0		14	ENSDARG00000025147	cd63	-0.311219	0.774573	0.965409	0	0	0
3	ENSDARG00000070124	ptpn23a	-0.198297	0.59867	1.31169	0	0	0		13	ENSDARG00000045837	si:dkey-14d8.20	0.105205	1.55996	0.355438	0	0	0		14	ENSDARG00000069476	spint2	0.105981	1.0095	0.913963	0	0	0
3	ENSDARG00000074023	rbms1a	-0.0111387	0.821339	1.309	0	0	0		13	ENSDARG00000074390	tmem176l.4	-0.19938	1.55029	1.03338	0	0	0		14	ENSDARG00000038489	b3gnt7	-0.291334	0.578498	0.911916	0	0	0
3	ENSDARG00000078233	ctnnd1	-0.0741702	0.628541	1.30674	0	0	0		13	ENSDARG00000052387	pou2f3	-0.0947989	1.54198	0.771352	0	0	0		14	ENSDARG00000014386	galnt6	0.11111	0.490333	0.841339	0	0	0
3	ENSDARG00000074688	fbrs	-0.00886609	0.51281	1.29987	0	0	0		13	ENSDARG00000101387	CAMK2N1	-0.365388	1.47729	1.63645	0	0	0		14	ENSDARG00000005254	kdelr2a	-0.175781	0.699555	0.749519	0	0	0
3	ENSDARG00000062831	si:ch73-22o12.1	-0.147742	0.768951	1.26413	0	0	0		13	ENSDARG00000008155	sms	-0.48828	1.41213	1.5156	0	0	0		14	ENSDARG00000006786	copz2	-0.100612	0.555392	0.735184	0	0	0
3	ENSDARG00000012140	ccnl1b	0.0919056	0.670524	1.25496	0	0	0		13	ENSDARG00000062370	bcl2l13	-0.121032	1.3576	1.66958	0	0	0		14	ENSDARG00000054433	yipf6	-0.0613884	0.418824	0.734037	0	0	0
3	ENSDARG00000100729	tln1	-0.079219	0.411713	1.21664	0	0	0		13	ENSDARG00000093673	si:dkey-28d5.4	-0.291375	1.34759	0.887811	0	0	0		14	ENSDARG00000071021	papss2a	-0.0311842	-0.109782	0.723918	0	0	0
3	ENSDARG00000051888	ist1	-0.261812	1.09759	1.20986	0	0	0		13	ENSDARG00000003293	sox9a	0.0136557	1.34611	1.1204	0	0	0		14	ENSDARG00000036335	c1galt1c1	-0.202033	0.545821	0.72168	0	0	0
3	ENSDARG00000040635	rnf11b	-0.0162795	0.751246	1.20457	0	0	0		13	ENSDARG00000117263	CABZ01056054.1	-0.808555	1.33167	1.48551	0	0	0		14	ENSDARG00000095559	si:dkey-246j7.1	0.157789	0.622988	0.639357	0	0	0
3	ENSDARG00000061459	si:dkey-253i9.4	-0.0569718	0.622634	1.17849	0	0	0		13	ENSDARG00000071113	xirp2a	-0.203534	1.32246	1.21783	0	0	0		14	ENSDARG00000070472	arf5	-0.101971	0.458482	0.609298	0	0	0
3	ENSDARG00000009484	arf1	-0.115367	0.979269	1.17499	0	0	0		13	ENSDARG00000058647	hck	-0.71866	1.29748	0.971716	0	0	0		14	ENSDARG00000033466	tagln2	-0.221173	0.761639	0.559976	0	0	0
3	ENSDARG00000112452	crebbpb	0.0128163	0.446541	1.16443	0	0	0		13	ENSDARG00000013051	zgc:158412	-0.512915	1.26775	0.880832	0	0	0		14	ENSDARG00000030957	yipf4	0.0340358	0.503789	0.546166	0	0	0
3	ENSDARG00000077948	usp54a	-0.097369	1.22824	1.15163	0	0	0		13	ENSDARG00000059342	avil	0.0894009	1.2302	1.14075	0	0	0		14	ENSDARG00000052429	syngr2a	-0.105837	0.753812	0.465222	0	0	0
3	ENSDARG00000068830	zgc:172139	-0.268139	0.801146	1.06782	0	0	0		13	ENSDARG00000097483	si:ch211-213d14.2	-0.535703	1.22555	0.419594	0	0	0		14	ENSDARG00000001804	zgc:112148	-0.109914	0.120593	0.428399	0	0	0
3	ENSDARG00000015552	phactr4a	-0.0778758	0.465732	1.06748	0	0	0		13	ENSDARG00000044760	gnaia	-0.1186	1.21425	1.33145	0	0	0		14	ENSDARG00000039892	gnpnat1	-0.387107	0.357194	0.376784	0	0	0
3	ENSDARG00000034056	csnk1g2b	-0.180766	0.854805	1.01721	0	0	0		13	ENSDARG00000018159	ano10b	0.319879	1.20826	1.44679	0	0	0		14	ENSDARG00000014556	serpinb1l3	0.10216	-0.365953	0.372549	0	0	0
3	ENSDARG00000074635	abca1a	0.108429	0.661019	0.99961	0	0	0		13	ENSDARG00000045305	pde7a	0.0047935	1.20585	1.43565	0	0	0		14	ENSDARG00000037361	kdelr2b	-0.236672	-0.492417	0.335409	0	0	0
3	ENSDARG00000062968	sbf1	-0.0440468	0.5197	0.969432	0	0	0		13	ENSDARG00000070047	rgs4	-0.206633	1.19212	-0.168915	0	0	0		14	ENSDARG00000014165	ssr3	0.0257463	-0.241926	0.0658822	0	0	0
3	ENSDARG00000043821	klf7b	0.073197	0.558264	0.911656	0	0	0		13	ENSDARG00000101637	ccnd1	-0.109952	1.14012	0.284626	0	0	0		14	ENSDARG00000099439	serp1	-0.128649	0.158414	-0.0650392	0	0	0
3	ENSDARG00000060729	trim8b	-0.0857729	0.414301	0.900684	0	0	0		13	ENSDARG00000004301	rhogb	-0.451603	1.12003	1.04035	0	0	0		14	ENSDARG00000040912	kdelr3	0.150825	-0.0473939	-0.312561	0	0	0
3	ENSDARG00000051768	fhod1	0.0191295	1.39076	0.892825	0	0	0		13	ENSDARG00000036058	gnao1b	0.174018	1.10786	2.7199	0	0	1		14	ENSDARG00000061432	zgc:194330	-1.05703	-0.0412406	-0.590916	0	0	0
3	ENSDARG00000017354	epha2a	-0.429461	1.48844	0.857911	0	0	0		13	ENSDARG00000103783	cyyr1	0.0656308	1.08468	1.06442	0	0	0		14	ENSDARG00000021669	sec61a1	0.245749	-0.582631	-0.791261	0	0	0
3	ENSDARG00000038012	fam83fa	-0.270525	0.287174	0.794192	0	0	0		13	ENSDARG00000010301	b4galt6	-0.12095	1.08363	1.32229	0	0	0		14	ENSDARG00000094438	plac8.2	-3.01038	0.274363	-5.40084	0	0	1
3	ENSDARG00000021082	sec31a	-0.175895	0.25925	0.766372	0	0	0		13	ENSDARG00000016084	spsb4a	0.262705	1.07572	0.74664	0	0	0
3	ENSDARG00000099371	cygb1	0.0659596	0.268479	0.760754	0	0	0		13	ENSDARG00000014050	ngfb	-0.253807	1.05662	0.487182	0	0	0
3	ENSDARG00000011564	sfpq	0.0395043	0.474616	0.740883	0	0	0		13	ENSDARG00000114345	si:dkey-28d5.5	-0.281937	1.05025	0.519956	0	0	0
3	ENSDARG00000088087	kdm6ba	0.0592839	-0.200758	0.69668	0	0	0		13	ENSDARG00000058325	casp8	-0.567752	1.03994	1.17109	0	0	0
3	ENSDARG00000015495	klf3	0.238047	0.092769	0.509707	0	0	0		13	ENSDARG00000008808	eml2	-0.250111	1.03017	1.97106	0	0	1
3	ENSDARG00000021987	plecb	-0.0772049	0.279458	0.480302	0	0	0		13	ENSDARG00000074782	adgrg3	-0.446127	1.02796	1.28748	0	0	0
3	ENSDARG00000007863	tra2a	-0.048703	0.635548	0.425695	0	0	0		13	ENSDARG00000102762	pik3r5	-0.583346	1.02296	0.885913	0	0	0
3	ENSDARG00000061732	raph1b	-0.151962	0.0402037	0.397446	0	0	0		13	ENSDARG00000087804	tnfrsf11a	-0.288577	1.01255	0.690054	0	0	0
3	ENSDARG00000009525	tial1	-0.164926	0.516593	0.384264	0	0	0		13	ENSDARG00000020893	slc25a55a	-0.0802818	1.00837	0.841312	0	0	0
3	ENSDARG00000035326	nccrp1	-0.16222	0.197079	0.293001	0	0	0		13	ENSDARG00000053583	cers6	0.178949	1.00183	2.3498	0	0	1
3	ENSDARG00000025076	marveld2a	-0.241574	0.484376	0.22719	0	0	0		13	ENSDARG00000077530	ahctf1	-0.00570689	0.976078	1.63142	0	0	0
3	ENSDARG00000036943	golph3l	-0.153463	0.695009	0.221414	0	0	0		13	ENSDARG00000098465	si:ch73-366l1.5	0.351995	0.963668	0.644006	0	0	0
3	ENSDARG00000039661	slc36a4	0.18661	0.0216211	0.0981822	0	0	0		13	ENSDARG00000099445	cc2d1b	-0.367444	0.962561	1.24453	0	0	0
3	ENSDARG00000100020	pim1	-0.187028	0.0187866	0.0955214	0	0	0		13	ENSDARG00000057867	lasp1	0.11353	0.955833	0.987022	0	0	0
3	ENSDARG00000086838	itga2.3	-0.463163	-0.057156	0.0539604	0	0	0		13	ENSDARG00000035715	marcksl1b	-0.309894	0.954463	1.01691	0	0	0
3	ENSDARG00000019316	fer1l6	-0.0904062	0.0881046	0.0448192	0	0	0		13	ENSDARG00000059001	pim2	-0.137853	0.951442	0.919194	0	0	0
3	ENSDARG00000099902	il17rc	0.0318578	0.713239	-0.0166788	0	0	0		13	ENSDARG00000010145	tor4aa	-0.26607	0.945511	1.4016	0	0	0
3	ENSDARG00000063050	rc3h2	-0.0162382	-0.0129335	-0.0962008	0	0	0		13	ENSDARG00000041413	adgrg11	0.0800025	0.936849	1.25049	0	0	0
3	ENSDARG00000100621	CABZ01080550.1	-0.825284	-0.705759	-0.109097	0	0	0		13	ENSDARG00000053447	ppp4r2b	-0.248084	0.925887	1.2468	0	0	0
3	ENSDARG00000027249	btg1	0.141235	-0.082334	-0.129367	0	0	0		13	ENSDARG00000015427	hdac1	-0.129538	0.910781	1.285	0	0	0
3	ENSDARG00000052652	fermt1	-0.143091	0.596459	-0.262174	0	0	0		13	ENSDARG00000016789	zgc:152891	-0.185085	0.908455	-0.0127766	0	0	0
3	ENSDARG00000096599	AL928650.3	-0.228965	-1.23811	-0.422236	0	0	0		13	ENSDARG00000102599	si:ch1073-392o20.2	-0.209289	0.90528	0.697273	0	0	0
3	ENSDARG00000045946	sec24d	0.0560804	-0.441494	-0.527153	0	0	0		13	ENSDARG00000104043	gng10	0.161112	0.896059	0.997581	0	0	0
3	ENSDARG00000098397	FP016106.1	-0.093643	-1.13626	-0.75582	0	0	0		13	ENSDARG00000029936	grtp1a	0.00285089	0.890287	1.71173	0	0	0
3	ENSDARG00000069390	itga2.1	-0.472809	-0.431049	-0.850475	0	0	0		13	ENSDARG00000033436	mboat7	-0.326153	0.846474	0.494692	0	0	0
3	ENSDARG00000078349	zmp:0000000845	-0.671218	-2.46804	-4.28468	0	1	1		13	ENSDARG00000029544	id2b	0.677941	0.844676	0.945709	0	0	0
										13	ENSDARG00000008030	myl9b	-0.0265768	0.832126	1.05841	0	0	0
										13	ENSDARG00000006299	arhgef7a	-0.364234	0.827024	1.1542	0	0	0
										13	ENSDARG00000070955	hmx3a	-0.11695	0.818253	0.201696	0	0	0
										13	ENSDARG00000103398	fabp1b.2	0.152814	0.806665	1.51553	0	0	0
										13	ENSDARG00000078888	iqgap1	-0.117887	0.793071	1.73725	0	0	0
										13	ENSDARG00000041159	si:ch211-63p21.4	0.587126	0.791265	0.290306	0	0	0
										13	ENSDARG00000035357	gnb2	-0.0319079	0.791038	0.838819	0	0	0
										13	ENSDARG00000090600	si:ch211-213a13.1	0.227507	0.785604	0.459747	0	0	0
										13	ENSDARG00000078308	spry2	0.0375675	0.781132	1.28211	0	0	0
										13	ENSDARG00000004592	gpr22a	0.170455	0.780251	1.25992	0	0	0
										13	ENSDARG00000028228	zbtb18	0.153446	0.780156	1.14476	0	0	0
										13	ENSDARG00000073961	si:ch211-160j14.2	-0.295331	0.778356	-0.321265	0	0	0
										13	ENSDARG00000058522	shq1	-0.0638698	0.759107	0.720497	0	0	0
										13	ENSDARG00000019398	psma6a	-0.438476	0.751516	1.27584	0	0	0
										13	ENSDARG00000034643	fhl3a	-0.113828	0.731517	0.711884	0	0	0
										13	ENSDARG00000020656	prkg1a	0.122575	0.72378	0.224642	0	0	0
										13	ENSDARG00000015628	psmd10	-0.27233	0.723087	1.64361	0	0	0
										13	ENSDARG00000104372	gnb1b	-0.064103	0.712401	1.06007	0	0	0
										13	ENSDARG00000076721	zgc:171686	-0.110548	0.705385	0.55452	0	0	0
										13	ENSDARG00000020625	jak1	-0.272122	0.687291	0.946946	0	0	0
										13	ENSDARG00000090454	gnb1a	-0.0413482	0.686198	1.21161	0	0	0
										13	ENSDARG00000006308	ptpn18	-0.198982	0.679321	1.49507	0	0	0
										13	ENSDARG00000060978	atp2a3	0.132149	0.673836	0.957501	0	0	0
										13	ENSDARG00000057273	alox5a	-0.222437	0.673418	0.788022	0	0	0
										13	ENSDARG00000039466	hnrnph3	-0.290387	0.669201	0.323983	0	0	0
										13	ENSDARG00000088167	si:ch211-112g6.4	-0.814511	0.666287	1.45795	0	0	0
										13	ENSDARG00000031108	lrba	-0.133991	0.665584	0.966277	0	0	0
										13	ENSDARG00000003961	parp3	-0.626722	0.65663	1.54491	0	0	0
										13	ENSDARG00000079216	dpep2	0.0487613	0.655212	0.268398	0	0	0
										13	ENSDARG00000077395	si:dkey-81n2.2	-0.126023	0.642129	-0.698897	0	0	0
										13	ENSDARG00000036754	hmgn3	-6.81118e-05	0.634447	0.614225	0	0	0
										13	ENSDARG00000070954	hmx2	-0.337069	0.633487	0.43242	0	0	0
										13	ENSDARG00000043131	BX664625.1	-0.155994	0.632267	0.67478	0	0	0
										13	ENSDARG00000033738	zgc:153867	-0.0594866	0.62175	0.924335	0	0	0
										13	ENSDARG00000018918	rad17	-0.483881	0.617059	1.70325	0	0	0
										13	ENSDARG00000101029	si:ch73-347e22.4	-0.0649054	0.614045	0.455726	0	0	0
										13	ENSDARG00000034293	hif1ab	-0.0506079	0.604669	1.11603	0	0	0
										13	ENSDARG00000063535	chd4a	-0.169735	0.599483	1.28677	0	0	0
										13	ENSDARG00000103914	THEM6	-0.640334	0.595342	0.990369	0	0	0
										13	ENSDARG00000053542	kctd12.2	-0.184681	0.58348	1.12892	0	0	0
										13	ENSDARG00000054903	mta3	-0.0206419	0.578715	0.909582	0	0	0
										13	ENSDARG00000062532	washc2c	-0.207248	0.576934	0.693189	0	0	0
										13	ENSDARG00000052703	cisd2	-0.343497	0.575455	0.777115	0	0	0
										13	ENSDARG00000098591	tubb2b	-0.0702599	0.574353	1.36843	0	0	0
										13	ENSDARG00000098228	thrap3b	-0.0759401	0.570492	0.859167	0	0	0
										13	ENSDARG00000042908	hsh2d	-0.409332	0.565008	1.2028	0	0	0
										13	ENSDARG00000087870	adgrf3a	-0.465991	0.534014	1.30252	0	0	0
										13	ENSDARG00000040237	mef2d	0.0289763	0.533559	1.02494	0	0	0
										13	ENSDARG00000093312	si:dkey-83f18.4	-1.65825	0.529614	0.474858	0	0	0
										13	ENSDARG00000098845	lrp12	0.0564728	0.529275	0.857439	0	0	0
										13	ENSDARG00000037883	prcp	0.0167796	0.528132	0.818106	0	0	0
										13	ENSDARG00000026829	cotl1	-0.383681	0.52509	0.683115	0	0	0
										13	ENSDARG00000022712	stat3	-0.614331	0.512974	0.39414	0	0	0
										13	ENSDARG00000012555	ak5	-0.193106	0.486826	0.236466	0	0	0
										13	ENSDARG00000062598	ltc4s	-0.563203	0.486214	-2.82436	0	0	1
										13	ENSDARG00000079626	elf2b	-0.0731787	0.473845	0.316857	0	0	0
										13	ENSDARG00000079175	si:ch211-79k12.1	0.0807177	0.459175	1.34569	0	0	0
										13	ENSDARG00000040884	mxi1	-0.147517	0.458484	0.80763	0	0	0
										13	ENSDARG00000052741	card11	-0.120105	0.455119	0.518113	0	0	0
										13	ENSDARG00000016143	xiap	0.142999	0.445708	0.758696	0	0	0
										13	ENSDARG00000077260	si:dkey-28d5.13	-1.21948	0.440576	1.13296	0	0	0
										13	ENSDARG00000099844	GNAZ	-0.0610425	0.44056	0.594425	0	0	0
										13	ENSDARG00000039215	arrb2a	-0.158057	0.425338	1.01161	0	0	0
										13	ENSDARG00000098792	znrf2b	-0.351223	0.420041	0.629153	0	0	0
										13	ENSDARG00000055075	svila	0.255389	0.407875	-0.0772771	0	0	0
										13	ENSDARG00000053113	ly75	-0.130118	0.405474	1.08246	0	0	0
										13	ENSDARG00000057491	n4bp1	-0.100766	0.3944	0.872967	0	0	0
										13	ENSDARG00000011824	pbxip1b	0.0966354	0.348373	0.97914	0	0	0
										13	ENSDARG00000008097	srsf9	-0.217599	0.341932	0.739517	0	0	0
										13	ENSDARG00000004537	kmt2a	0.0200229	0.294177	0.272961	0	0	0
										13	ENSDARG00000088124	adrb2a	-0.0831374	0.291275	0.0672755	0	0	0
										13	ENSDARG00000069006	tle3b	0.263659	0.276855	1.00168	0	0	0
										13	ENSDARG00000042141	myo6b	-0.213755	0.261456	-0.533863	0	0	0
										13	ENSDARG00000017757	pik3cg	-0.289222	0.245941	0.846572	0	0	0
										13	ENSDARG00000098075	sh3bgrl3	-0.143184	0.245327	0.579757	0	0	0
										13	ENSDARG00000090607	si:dkeyp-117b11.1	-0.479161	0.24025	1.91818	0	0	1
										13	ENSDARG00000070822	cnp	-0.118911	0.235851	0.700075	0	0	0
										13	ENSDARG00000101443	relch	-0.219257	0.21756	0.965145	0	0	0
										13	ENSDARG00000045156	rgs9b	-0.777984	0.182967	1.35127	0	0	0
										13	ENSDARG00000116139	cdx1b	-0.215372	0.160023	0.746894	0	0	0
										13	ENSDARG00000097256	si:ch211-270g19.5	0.120325	0.156833	-0.225541	0	0	0
										13	ENSDARG00000074602	mrvi1	-0.0121917	0.154577	0.296002	0	0	0
										13	ENSDARG00000044016	myo6a	-0.293902	0.150999	-0.288124	0	0	0
										13	ENSDARG00000079434	tmem131l	-0.055155	0.139789	0.622226	0	0	0
										13	ENSDARG00000069833	rhbdl2	-0.0280849	0.137278	0.455687	0	0	0
										13	ENSDARG00000030349	cryba2a	-0.226057	0.0856786	0.622204	0	0	0
										13	ENSDARG00000005861	ralgapa2	0.0279105	0.0761964	0.406776	0	0	0
										13	ENSDARG00000074184	arhgap32b	-0.0298151	0.0672176	0.905919	0	0	0
										13	ENSDARG00000074311	mast2	-0.143975	0.0541503	0.356381	0	0	0
										13	ENSDARG00000004696	eefsec	-0.447351	0.0478749	0.181568	0	0	0
										13	ENSDARG00000058638	si:ch211-71m22.1	-0.367142	0.0199752	0.631559	0	0	0
										13	ENSDARG00000045574	lrmp	-0.283186	0.0180391	0.264368	0	0	0
										13	ENSDARG00000041060	lgals9l3	-0.248947	0.0161033	-1.09948	0	0	0
										13	ENSDARG00000010411	epn1	0.00977836	0.0114468	0.511668	0	0	0
										13	ENSDARG00000016038	hacd3	-0.384933	0.00463277	0.50555	0	0	0
										13	ENSDARG00000021991	erlin1	-0.166079	-0.00771449	-0.098478	0	0	0
										13	ENSDARG00000056228	pld1a	-0.138946	-0.0123176	-0.422199	0	0	0
										13	ENSDARG00000091169	tor4ab	-0.114254	-0.0181143	1.72276	0	0	0
										13	ENSDARG00000090086	rab11bb	-0.0136608	-0.0300125	-0.750593	0	0	0
										13	ENSDARG00000075673	arhgap21b	-0.0788164	-0.0543921	0.220888	0	0	0
										13	ENSDARG00000103589	gata6	0.0406736	-0.0551602	1.01493	0	0	0
										13	ENSDARG00000105863	FO904970.1	-0.274764	-0.0708444	0.619679	0	0	0
										13	ENSDARG00000014599	slc5a6b	-0.400479	-0.0983983	0.485587	0	0	0
										13	ENSDARG00000043249	irf1b	-0.500841	-0.105671	-1.85393	0	0	1
										13	ENSDARG00000031164	tuba8l2	0.272033	-0.109242	-0.214459	0	0	0
										13	ENSDARG00000100972	myh11b	-0.196695	-0.123406	-1.10463	0	0	0
										13	ENSDARG00000105185	snx7	-0.298144	-0.154711	-0.368583	0	0	0
										13	ENSDARG00000005586	zbtb20	0.317874	-0.204308	0.144688	0	0	0
										13	ENSDARG00000110748	CABZ01056052.1	-0.630896	-0.223099	0.58022	0	0	0
										13	ENSDARG00000022698	lad1	-0.406358	-0.260687	-3.04825	0	0	1
										13	ENSDARG00000104408	zgc:152774	-0.0695157	-0.307235	0.742651	0	0	0
										13	ENSDARG00000086903	gig2o	-0.0364818	-0.309056	-0.285944	0	0	0
										13	ENSDARG00000087749	ccser2a	0.0291686	-0.311603	-0.510377	0	0	0
										13	ENSDARG00000038123	myl9a	0.0730038	-0.313956	0.154519	0	0	0
										13	ENSDARG00000056324	zgc:123295	-0.65031	-0.324439	-0.610622	0	0	0
										13	ENSDARG00000015887	b2ml	-0.0399343	-0.327136	-0.124721	0	0	0
										13	ENSDARG00000079895	ehbp1l1b	0.0995438	-0.361686	-0.284785	0	0	0
										13	ENSDARG00000036588	mhc1zba	0.0163104	-0.363155	-0.0821906	0	0	0
										13	ENSDARG00000025902	plekhg5a	-0.217345	-0.374196	-0.308585	0	0	0
										13	ENSDARG00000068760	tnks1bp1	-0.0472747	-0.384584	-0.127315	0	0	0
										13	ENSDARG00000089043	ptpn6	-0.651937	-0.406797	-1.17551	0	0	0
										13	ENSDARG00000025797	abhd2a	-0.024728	-0.433374	0.132746	0	0	0
										13	ENSDARG00000029890	si:dkeyp-86f7.4	-0.0236736	-0.442894	-9.86101	0	0	1
										13	ENSDARG00000011581	si:dkey-23k10.5	-0.242942	-0.514294	-1.15606	0	0	0
										13	ENSDARG00000068763	plcg2	-0.591516	-0.616879	-0.777009	0	0	0
										13	ENSDARG00000099465	rnf213a	-0.30973	-0.661898	-0.180177	0	0	0
										13	ENSDARG00000092520	si:dkey-250k15.10	-0.540574	-0.688683	-0.824561	0	0	0
										13	ENSDARG00000039351	ccl19b	-1.1276	-0.735207	-0.542512	0	0	0
										13	ENSDARG00000075757	gig2e	0.185423	-0.802025	-1.47075	0	0	0
										13	ENSDARG00000033144	psme2	-0.480021	-0.877789	-0.776802	0	0	0
										13	ENSDARG00000061145	gfod2	0.131769	-0.902995	0.470758	0	0	0
										13	ENSDARG00000108060	LO017771.1	-0.321053	-1.05251	2.92123	0	0	1
										13	ENSDARG00000103444	gig2h	-0.375582	-1.16939	-1.79188	0	0	1
										13	ENSDARG00000044362	unc119b	-0.951511	-1.38694	0.166742	0	0	0
										13	ENSDARG00000045415	gnal	-0.180935	-1.57605	0.0261454	0	0	0
										13	ENSDARG00000093279	si:dkey-11o1.3	-0.209863	-1.66581	-1.57493	0	0	0

## Sheet: enteroendocrine (8,11,12,21,22)
enteroendocrine cells	ensembl_gene_id	gene	hnf4gCV2.vs.WTCV2 log2	hnf4aCV1.vs.WTCV1 log2	hnf4a_hnf4gCR3.vs.WTCR3 log2	hnf4gCV2.vs.WTCV2 significant	hnf4aCV1.vs.WTCV1 significant	hnf4a_hnf4gCR3.vs.WTCR3 significant		enteroendocrine cells	ensembl_gene_id	gene	hnf4gCV2.vs.WTCV2 log2	hnf4aCV1.vs.WTCV1 log2	hnf4a_hnf4gCR3.vs.WTCR3 log2	hnf4gCV2.vs.WTCV2 significant	hnf4aCV1.vs.WTCV1 significant	hnf4a_hnf4gCR3.vs.WTCR3 significant		enteroendocrine cells	ensembl_gene_id	gene	hnf4gCV2.vs.WTCV2 log2	hnf4aCV1.vs.WTCV1 log2	hnf4a_hnf4gCR3.vs.WTCR3 log2	hnf4gCV2.vs.WTCV2 significant	hnf4aCV1.vs.WTCV1 significant	hnf4a_hnf4gCR3.vs.WTCR3 significant		enteroendocrine cells	ensembl_gene_id	gene	hnf4gCV2.vs.WTCV2 log2	hnf4aCV1.vs.WTCV1 log2	hnf4a_hnf4gCR3.vs.WTCR3 log2	hnf4gCV2.vs.WTCV2 significant	hnf4aCV1.vs.WTCV1 significant	hnf4a_hnf4gCR3.vs.WTCR3 significant		enteroendocrine cells	ensembl_gene_id	gene	hnf4gCV2.vs.WTCV2 log2	hnf4aCV1.vs.WTCV1 log2	hnf4a_hnf4gCR3.vs.WTCR3 log2	hnf4gCV2.vs.WTCV2 significant	hnf4aCV1.vs.WTCV1 significant	hnf4a_hnf4gCR3.vs.WTCR3 significant
8	ENSDARG00000035832	pyyb	0.115289	0.310909	2.57989	0	0	1		11	ENSDARG00000058464	rasd3	0.709531	1.24355	2.87341	0	0	1		12	ENSDARG00000089331	urahb	1.23521	0.211358	6.81739	0	0	1		21	ENSDARG00000001873	phgdh	-0.40198	3.8856	3.29537	0	1	1		22	ENSDARG00000043154	ucp2	0.218361	1.44667	2.68692	0	0	1
8	ENSDARG00000059054	pdk2b	0.254685	1.4716	1.99408	0	0	1		11	ENSDARG00000015543	s100a1	-0.507106	2.43443	2.77	0	1	1		12	ENSDARG00000077799	egr4	0.673207	-0.0378228	4.07163	0	0	1		21	ENSDARG00000016733	psat1	-0.628627	3.32075	3.81334	0	1	1		22	ENSDARG00000035631	sdf2l1	-0.83691	0.725151	2.0614	0	0	1
8	ENSDARG00000002216	tbx3a	0.0629146	0.754656	1.66615	0	0	0		11	ENSDARG00000076546	trhra	0.272958	0.522827	2.23941	0	0	1		12	ENSDARG00000002656	stxbp5a	0.0822884	0.115054	2.68967	0	0	1		21	ENSDARG00000041295	lim2.5	0.373772	3.22023	-0.107312	0	1	0		22	ENSDARG00000079296	gcga	-0.0731078	1.58251	1.83997	0	0	1
8	ENSDARG00000045482	stk38l	-0.131464	1.68711	1.64502	0	0	0		11	ENSDARG00000043342	gpx3	-0.231937	1.66667	1.91011	0	0	1		12	ENSDARG00000098662	si:ch73-359m17.9	0.21473	1.67973	2.59285	0	0	1		21	ENSDARG00000019702	aldocb	-0.0769579	2.70635	2.03879	0	1	1		22	ENSDARG00000019451	pcsk2	0.210574	-0.115856	1.59788	0	0	0
8	ENSDARG00000101908	rab3ip	-0.0945364	0.560509	1.55752	0	0	0		11	ENSDARG00000040027	osbpl10b	0.0170085	1.03905	1.79748	0	0	1		12	ENSDARG00000000796	nr4a1	0.396136	-0.17756	2.57065	0	0	1		21	ENSDARG00000104458	rnasekb	-0.110295	2.04513	1.67839	0	1	0		22	ENSDARG00000016412	agt	-0.515773	2.1687	1.47439	0	1	0
8	ENSDARG00000020876	pdk2a	0.0587071	0.441398	1.41899	0	0	0		11	ENSDARG00000037020	kif1b	-0.147131	1.18506	1.67455	0	0	0		12	ENSDARG00000069503	cldnh	0.174661	0.971086	2.32216	0	0	1		21	ENSDARG00000019274	rasd1	-0.334069	2.02404	2.28491	0	1	1		22	ENSDARG00000074490	casc4	0.0528411	0.556831	1.4712	0	0	0
8	ENSDARG00000061120	slc43a2b	0.326357	-0.0106923	1.20381	0	0	0		11	ENSDARG00000003189	psmd1	-0.360473	0.676787	1.61268	0	0	0		12	ENSDARG00000075121	hbegfa	0.0627613	1.73637	1.94034	0	0	1		21	ENSDARG00000056590	calca	-0.165226	2.00716	1.6553	0	1	0		22	ENSDARG00000018492	znf503	0.222282	1.07323	1.29909	0	0	0
8	ENSDARG00000002576	cabp5a	0.543624	1.16196	1.17533	0	0	0		11	ENSDARG00000059945	sv2a	0.0936131	0.708117	1.10007	0	0	0		12	ENSDARG00000037747	fscn1b	-0.87598	0.586058	1.93406	0	0	1		21	ENSDARG00000088612	si:ch211-153b23.7	-1.01916	1.77995	1.39119	0	1	0		22	ENSDARG00000091377	galn	-0.156126	0.545189	1.29525	0	0	0
8	ENSDARG00000099184	map2k6	-0.0821287	-0.357968	1.08411	0	0	0		11	ENSDARG00000070810	ccka	0.0640095	0.518346	0.928299	0	0	0		12	ENSDARG00000091061	slc38a3b	0.0895804	2.32747	1.89526	0	1	1		21	ENSDARG00000004840	rassf1	-0.242836	1.70412	0.886767	0	0	0		22	ENSDARG00000070966	insl5a	-0.0813859	-0.0958238	1.27374	0	0	0
8	ENSDARG00000054239	ghrl	-0.0666695	0.678215	1.04637	0	0	0		11	ENSDARG00000074425	si:busm1-57f23.1	-0.393502	1.48661	0.850656	0	0	0		12	ENSDARG00000075819	arhgef2	-0.256161	1.26621	1.77379	0	0	1		21	ENSDARG00000061099	nfasca	-0.0341028	1.67726	2.12368	0	0	1		22	ENSDARG00000004261	tmed9	-0.286588	0.945962	1.19239	0	0	0
8	ENSDARG00000038900	acadm	-0.0247211	0.0770634	0.870467	0	0	0		11	ENSDARG00000099233	si:zfos-2372e4.1	0.568934	0.157856	0.66655	0	0	0		12	ENSDARG00000039943	tent5ba	-0.288606	0.685979	1.68862	0	0	0		21	ENSDARG00000058366	si:dkey-222f8.3	0.0280215	1.64209	1.03458	0	0	0		22	ENSDARG00000079443	vipb	-0.347969	0.649324	1.05182	0	0	0
8	ENSDARG00000094557	nupr1b	-0.263082	-0.180021	0.828721	0	0	0		11	ENSDARG00000040177	rgs16	-0.637067	0.824667	0.321757	0	0	0		12	ENSDARG00000104815	lmx1ba	-0.228445	1.31766	1.64938	0	0	0		21	ENSDARG00000054911	tmsb	0.175209	1.62299	0.922372	0	0	0		22	ENSDARG00000069294	insl5b	-0.0869327	-0.139465	1.00301	0	0	0
8	ENSDARG00000007449	slc25a39	-0.381958	0.0688428	0.775892	0	0	0		11	ENSDARG00000030157	mybpc2a	0.738426	1.88281	0.268448	0	1	0		12	ENSDARG00000034048	zgc:92275	0.294706	0.24647	1.53619	0	0	0		21	ENSDARG00000086654	cbln11	-1.0456	1.61044	0.798011	0	0	0		22	ENSDARG00000002779	pdx1	0.308298	0.392379	0.974152	0	0	0
8	ENSDARG00000006747	tmem178b	0.0730304	0.809094	0.694342	0	0	0		11	ENSDARG00000012684	atp2b1a	-0.199346	-0.510909	0.247616	0	0	0		12	ENSDARG00000045842	zgc:113263	-0.0123044	1.40071	1.40137	0	0	0		21	ENSDARG00000035253	npr3	-0.336565	1.48434	1.22355	0	0	0		22	ENSDARG00000093089	tac3a	-0.422672	0.441917	0.878924	0	0	0
8	ENSDARG00000056322	ldb3a	0.258798	0.836175	0.523262	0	0	0		11	ENSDARG00000055395	foxq1b	0.0806985	-0.184751	0.117683	0	0	0		12	ENSDARG00000099241	ppp2cb	-0.231343	0.8534	1.34966	0	0	0		21	ENSDARG00000098387	tmem176l.3a	0.506652	1.33608	0.86094	0	0	0		22	ENSDARG00000008829	chga	0.190071	1.28813	0.790734	0	0	0
8	ENSDARG00000075831	slc7a8a	0.223704	0.29377	0.390655	0	0	0		11	ENSDARG00000098880	pclob	-0.187678	0.401435	0.109583	0	0	0		12	ENSDARG00000100515	dusp1	0.198393	-0.720116	1.3208	0	0	0		21	ENSDARG00000004460	desi2	-0.110584	1.24002	1.52206	0	0	0		22	ENSDARG00000069028	rxfp3.3a1	-0.23954	0.646663	0.78871	0	0	0
8	ENSDARG00000009242	fev	-0.00264534	-0.0350377	0.332357	0	0	0		11	ENSDARG00000032571	il20ra	-0.048776	-0.624864	0.0247157	0	0	0		12	ENSDARG00000014462	rab3c	-0.578944	0.833549	1.29111	0	0	0		21	ENSDARG00000053027	si:dkey-33i11.1	0.089656	1.23498	1.67471	0	0	0		22	ENSDARG00000105503	fndc3a	-0.11084	0.195662	0.716831	0	0	0
8	ENSDARG00000087798	pdyn	-0.0116278	0.466461	0.238752	0	0	0		11	ENSDARG00000021336	pax4	-0.929028	-0.106662	-0.516941	0	0	0		12	ENSDARG00000077167	nmbb	0.674295	0.822424	1.19257	0	0	0		21	ENSDARG00000099960	elovl1a	-0.388633	1.22647	1.66198	0	0	0		22	ENSDARG00000098112	btc	-0.0285407	0.389079	0.561051	0	0	0
8	ENSDARG00000070425	dll4	0.0567481	0.252972	0.211585	0	0	0		11	ENSDARG00000024694	myo1b	0.0214165	-0.181783	-0.543832	0	0	0		12	ENSDARG00000029621	sgms1	-0.166197	0.830195	1.18086	0	0	0		21	ENSDARG00000099425	CABZ01073265.1	-0.336947	1.22458	1.42203	0	0	0		22	ENSDARG00000070603	hspa12a	-0.172941	1.15328	0.527634	0	0	0
8	ENSDARG00000055781	ptger3	-0.134971	-0.385594	-0.116524	0	0	0		11	ENSDARG00000089507	ugt1b5	0.0505718	-0.990638	-0.721584	0	0	0		12	ENSDARG00000044083	peli1b	-0.042888	0.843017	1.16247	0	0	0		21	ENSDARG00000021975	ginm1	-0.322906	1.19464	0.949335	0	0	0		22	ENSDARG00000002644	rgs5a	0.251287	0.353742	0.515592	0	0	0
8	ENSDARG00000076122	si:ch211-160b11.4	-0.241207	-0.211768	-0.191106	0	0	0		11	ENSDARG00000044685	nr0b2a	-1.01285	-2.7332	-1.16819	0	1	0		12	ENSDARG00000008867	rap1b	-0.176002	1.05822	1.11451	0	0	0		21	ENSDARG00000091592	peli1a	-0.042666	1.18933	1.79225	0	0	1		22	ENSDARG00000060092	zgc:165481	0.0881445	0.694706	0.473191	0	0	0
8	ENSDARG00000014190	sst2	0.23273	0.376083	-0.846419	0	0	0		11	ENSDARG00000112125	FP236331.1	-0.0699388	-0.750679	-2.07827	0	0	1		12	ENSDARG00000013750	eno1b	-0.164788	2.10629	1.07796	0	1	0		21	ENSDARG00000070453	gch1	0.0542736	1.11029	2.01016	0	0	1		22	ENSDARG00000103697	arnt2	0.275178	0.607071	0.416524	0	0	0
8	ENSDARG00000092916	mlnl	-0.141459	-1.07006	-0.961415	0	0	0												12	ENSDARG00000057665	sprn2	0.243648	0.246092	1.00798	0	0	0		21	ENSDARG00000004059	galk2	-0.660298	1.09689	0.709624	0	0	0		22	ENSDARG00000101606	rims2a	0.241615	0.972433	0.307255	0	0	0
8	ENSDARG00000094730	acbd7	-0.838748	-0.799389	-1.45014	0	0	0												12	ENSDARG00000004232	dlb	-0.0768604	1.21324	0.986134	0	0	0		21	ENSDARG00000102636	trmt9b	0.276253	1.0334	1.04351	0	0	0		22	ENSDARG00000003281	pik3ip1	0.191324	0.572003	0.275288	0	0	0
8	ENSDARG00000003931	cndp2	0.0097692	-0.950754	-1.54841	0	0	0												12	ENSDARG00000061481	wu:fj05g07	0.251478	0.0199129	0.893011	0	0	0		21	ENSDARG00000045248	h3f3d	-0.135053	1.03075	1.05206	0	0	0		22	ENSDARG00000003681	eif5	-0.0710386	0.325185	0.257115	0	0	0
8	ENSDARG00000008637	mttp	0.0101791	-0.995185	-2.03567	0	0	1												12	ENSDARG00000029112	gem	-0.159748	0.836701	0.861205	0	0	0		21	ENSDARG00000016837	glipr2l	-0.834204	1.02682	0.880379	0	0	0		22	ENSDARG00000045594	shisal1a	0.0208431	0.678943	0.250884	0	0	0
8	ENSDARG00000026017	xpnpep2	0.0457869	-0.854747	-2.22595	0	0	1												12	ENSDARG00000018328	rhocb	-0.0171723	0.485881	0.859731	0	0	0		21	ENSDARG00000013087	ndrg3a	-0.0354744	1.02308	1.53309	0	0	0		22	ENSDARG00000062972	hip1	-0.0927728	-0.315288	0.207757	0	0	0
8	ENSDARG00000044528	slc15a1b	0.321329	-0.604654	-4.45865	0	0	1												12	ENSDARG00000104676	prkd2	0.0891294	0.257602	0.827221	0	0	0		21	ENSDARG00000104782	oaz1b	-0.0817318	1.00551	1.42967	0	0	0		22	ENSDARG00000058133	foxd2	-0.437514	0.244527	0.19092	0	0	0
																				12	ENSDARG00000086790	gucy1b1	-0.0251483	0.581849	0.824426	0	0	0		21	ENSDARG00000071492	fbxo45	-0.4949	0.979918	0.920975	0	0	0		22	ENSDARG00000017739	ak5l	0.174285	1.45704	-0.0462973	0	0	0
																				12	ENSDARG00000052866	htt	-0.119544	0.322834	0.812993	0	0	0		21	ENSDARG00000076853	areg	-0.0715747	0.973327	0.671611	0	0	0		22	ENSDARG00000087413	bean1	-0.116133	0.205446	-0.0723489	0	0	0
																				12	ENSDARG00000003697	slc5a8l	0.100155	0.394903	0.80531	0	0	0		21	ENSDARG00000056479	rab1bb	-0.386486	0.94097	1.343	0	0	0		22	ENSDARG00000019541	gpt2l	-0.0741584	0.0793061	-0.121496	0	0	0
																				12	ENSDARG00000101095	cpne4a	-0.204262	0.643193	0.784514	0	0	0		21	ENSDARG00000023117	gopc	-0.0638359	0.914109	1.6244	0	0	0		22	ENSDARG00000052271	slc22a18	-0.323406	0.0947403	-0.183503	0	0	0
																				12	ENSDARG00000071395	camk2g1	0.236775	0.62518	0.781215	0	0	0		21	ENSDARG00000013681	si:dkey-42i9.6	-0.0684277	0.882825	1.12505	0	0	0		22	ENSDARG00000058819	nog1	-0.22687	0.43035	-0.265904	0	0	0
																				12	ENSDARG00000056633	fgf13b	-0.0377804	1.03457	0.771292	0	0	0		21	ENSDARG00000068628	rab8b	-0.427971	0.879508	0.847846	0	0	0		22	ENSDARG00000055540	pfkfb4a	0.493881	-0.222375	-0.290755	0	0	0
																				12	ENSDARG00000076280	ppp1r1b	-0.00764221	1.35605	0.767623	0	0	0		21	ENSDARG00000021374	cab39l1	0.00385993	0.852552	1.17595	0	0	0		22	ENSDARG00000028485	cabp5b	-2.17465	2.3332	-0.411769	0	0	0
																				12	ENSDARG00000031246	hbegfb	-0.123635	0.237835	0.761291	0	0	0		21	ENSDARG00000069199	zgc:172120	-0.0289457	0.835219	0.945752	0	0	0		22	ENSDARG00000002994	itpkca	-0.280369	-0.440411	-0.834034	0	0	0
																				12	ENSDARG00000089413	mbpb	0.0251027	0.541901	0.748053	0	0	0		21	ENSDARG00000069940	ppap2d	-0.106381	0.824901	0.708049	0	0	0		22	ENSDARG00000025615	prr15la	-0.223499	-0.86906	-1.43096	0	0	0
																				12	ENSDARG00000111612	mapkapk3	0.0288082	0.816369	0.746227	0	0	0		21	ENSDARG00000017595	ccdc6b	0.168012	0.809662	1.54763	0	0	0		22	ENSDARG00000068387	slc6a18	-0.39689	-0.541804	-3.23319	0	0	1
																				12	ENSDARG00000024785	ctnna2	-0.140286	0.182326	0.732825	0	0	0		21	ENSDARG00000029501	gsk3aa	0.140086	0.790425	1.1906	0	0	0		22	ENSDARG00000016918	ace2	0.00832202	-0.933358	-7.94015	0	0	1
																				12	ENSDARG00000035986	ptpn2b	-0.059213	0.5243	0.690718	0	0	0		21	ENSDARG00000101631	etfa	-0.0721479	0.770914	1.27212	0	0	0
																				12	ENSDARG00000012513	sdcbp2	-0.283864	0.659378	0.635385	0	0	0		21	ENSDARG00000040152	nek4	-0.296985	0.761065	0.779672	0	0	0
																				12	ENSDARG00000005112	cdh17	-0.0307893	-0.136343	0.630161	0	0	0		21	ENSDARG00000036505	syt4	-0.231687	0.757841	0.406438	0	0	0
																				12	ENSDARG00000097652	si:dkey-234i14.2	-0.0640726	0.0167574	0.6023	0	0	0		21	ENSDARG00000038574	scg2b	-0.187329	0.744162	0.88658	0	0	0
																				12	ENSDARG00000010816	slc7a14a	-0.0356101	0.291569	0.594491	0	0	0		21	ENSDARG00000005536	ubr7	-0.279561	0.741641	1.10435	0	0	0
																				12	ENSDARG00000071872	zdhhc15b	-0.274218	0.577378	0.555329	0	0	0		21	ENSDARG00000100494	pbx1a	0.050486	0.737121	0.732123	0	0	0
																				12	ENSDARG00000062217	kcnj3b	0.132087	0.350053	0.544567	0	0	0		21	ENSDARG00000024940	rnf144b	-0.0971237	0.656492	0.856653	0	0	0
																				12	ENSDARG00000000853	dstyk	0.265811	0.0561698	0.527383	0	0	0		21	ENSDARG00000013500	abca2	-0.0520591	0.626324	1.28022	0	0	0
																				12	ENSDARG00000053559	tspan3b	-0.0848234	-0.402675	0.514667	0	0	0		21	ENSDARG00000094646	dyrk2	0.205259	0.622314	1.18826	0	0	0
																				12	ENSDARG00000036082	tph1b	-0.468001	0.728852	0.498566	0	0	0		21	ENSDARG00000062674	btbd10a	-0.0894116	0.582837	0.740079	0	0	0
																				12	ENSDARG00000069763	etv5a	0.160498	1.04534	0.486604	0	0	0		21	ENSDARG00000037362	scube2	0.134831	0.572795	-0.027268	0	0	0
																				12	ENSDARG00000104573	slc12a2	-0.13886	1.11054	0.480221	0	0	0		21	ENSDARG00000055278	cfb	-0.69224	0.5625	-0.871548	0	0	0
																				12	ENSDARG00000004869	penka	-0.349861	0.516918	0.471775	0	0	0		21	ENSDARG00000063157	mapk8ip2	-0.218068	0.561346	0.540079	0	0	0
																				12	ENSDARG00000098368	aplp1	0.0726773	0.0224679	0.438796	0	0	0		21	ENSDARG00000090472	ttll10	0.229481	0.555263	0.9015	0	0	0
																				12	ENSDARG00000040965	zgc:101731	-0.0242633	0.738022	0.431589	0	0	0		21	ENSDARG00000073872	tpst1	-0.0323681	0.551996	0.975899	0	0	0
																				12	ENSDARG00000043299	nmu	-0.344093	0.64754	0.425271	0	0	0		21	ENSDARG00000096631	MED9	-0.0930262	0.549835	1.00817	0	0	0
																				12	ENSDARG00000045131	id4	-0.133443	0.477931	0.410093	0	0	0		21	ENSDARG00000057913	syt11a	0.00965798	0.528274	0.469112	0	0	0
																				12	ENSDARG00000006878	phf21aa	0.303941	0.449295	0.344062	0	0	0		21	ENSDARG00000015759	tspan7	-0.463896	0.498514	1.48755	0	0	0
																				12	ENSDARG00000059333	si:ch211-285f17.1	-0.0450756	0.0829504	0.32512	0	0	0		21	ENSDARG00000028721	mapk14b	-0.0195003	0.494418	0.830058	0	0	0
																				12	ENSDARG00000104695	BX088587.1	0.348086	-0.288737	0.315908	0	0	0		21	ENSDARG00000030087	nfkbib	-0.470093	0.492781	-0.117899	0	0	0
																				12	ENSDARG00000031875	trpa1b	-0.232004	0.298198	0.311495	0	0	0		21	ENSDARG00000075437	shc1	-0.0241894	0.48853	1.36839	0	0	0
																				12	ENSDARG00000001710	flot1a	0.0584403	0.788529	0.22203	0	0	0		21	ENSDARG00000043857	ufm1	-0.227316	0.469495	0.557343	0	0	0
																				12	ENSDARG00000040465	irf2	0.0286905	-0.0268485	0.221946	0	0	0		21	ENSDARG00000012040	rnf19a	-0.134558	0.460803	1.04056	0	0	0
																				12	ENSDARG00000002600	pcsk1	-0.274621	0.367018	0.152136	0	0	0		21	ENSDARG00000032083	dpysl2b	-0.251165	0.460532	0.75816	0	0	0
																				12	ENSDARG00000002758	dedd1	-0.0438997	0.084575	0.095868	0	0	0		21	ENSDARG00000057714	cmah	-0.0555706	0.437655	0.755268	0	0	0
																				12	ENSDARG00000063088	si:dkey-211g8.6	-0.644511	0.304205	0.0385682	0	0	0		21	ENSDARG00000042557	rnf144ab	0.0887094	0.431351	0.574453	0	0	0
																				12	ENSDARG00000018817	bdnf	-0.109839	0.826117	0.0333956	0	0	0		21	ENSDARG00000039882	ap3s2	-0.411992	0.426757	1.04976	0	0	0
																				12	ENSDARG00000018303	etv4	0.0581608	0.944642	0.019921	0	0	0		21	ENSDARG00000061647	nrxn1a	-0.102027	0.425261	1.00502	0	0	0
																				12	ENSDARG00000015575	cyp3c1	-0.216919	-0.0169833	-0.0416756	0	0	0		21	ENSDARG00000038687	nfkb2	-0.622679	0.392341	0.0557505	0	0	0
																				12	ENSDARG00000105630	alpk3b	0.100789	0.893799	-0.0544081	0	0	0		21	ENSDARG00000025693	tmem9b	-0.299818	0.391714	0.17516	0	0	0
																				12	ENSDARG00000006602	chrna2a	0.0072213	-0.403971	-0.0992905	0	0	0		21	ENSDARG00000101008	soul4	-0.0457783	0.367715	0.392476	0	0	0
																				12	ENSDARG00000019986	grhprb	-0.164191	0.0192658	-0.151438	0	0	0		21	ENSDARG00000069498	phkg1b	0.0516348	0.329476	1.18939	0	0	0
																				12	ENSDARG00000051915	pde5ab	0.196946	-0.347215	-0.205267	0	0	0		21	ENSDARG00000069438	neurl1aa	-0.137318	0.329331	0.94314	0	0	0
																				12	ENSDARG00000079553	cd83	-1.26312	-0.546773	-0.26203	0	0	0		21	ENSDARG00000006497	rtn1a	-0.0868536	0.327568	0.770583	0	0	0
																				12	ENSDARG00000055365	si:dkey-25e12.3	-1.08532	0.952838	-0.299181	0	0	0		21	ENSDARG00000117418	CR556712.1	0.283777	0.309783	2.17556	0	0	1
																				12	ENSDARG00000009950	edf1	-0.0983618	-0.478373	-0.363838	0	0	0		21	ENSDARG00000014361	tmbim4	-0.0924146	0.308312	0.35881	0	0	0
																				12	ENSDARG00000004015	adcyap1a	-0.451778	0.419173	-0.364299	0	0	0		21	ENSDARG00000105113	galr2b	-0.412287	0.250769	1.06305	0	0	0
																				12	ENSDARG00000044511	etv5b	-0.629597	-0.143036	-0.394562	0	0	0		21	ENSDARG00000008049	si:dkey-42i9.4	-0.329274	0.248828	-0.203744	0	0	0
																				12	ENSDARG00000074600	gpr78a	0.0414602	0.102738	-0.542145	0	0	0		21	ENSDARG00000055381	bambia	0.0257308	0.222187	0.878763	0	0	0
																				12	ENSDARG00000096645	si:ch211-131k2.2	-0.233196	-1.56983	-0.813627	0	0	0		21	ENSDARG00000056642	hdac9b	-0.44538	0.191133	0.196349	0	0	0
																				12	ENSDARG00000105416	adgrg4a	-0.0174525	-0.188687	-0.863593	0	0	0		21	ENSDARG00000056587	cyp2r1	-0.801154	0.180066	0.927792	0	0	0
																				12	ENSDARG00000061375	sgpl1	0.0269733	-1.13924	-1.33779	0	0	0		21	ENSDARG00000069009	si:ch211-147a11.3	-0.227409	0.167454	0.642146	0	0	0
																				12	ENSDARG00000104108	slco1d1	0.0267183	-1.04324	-1.38196	0	0	0		21	ENSDARG00000053129	carhsp1	0.266204	0.158311	0.384308	0	0	0
																				12	ENSDARG00000061819	wscd2	0.315703	-1.10143	-1.64029	0	0	0		21	ENSDARG00000043673	si:dkey-174m14.3	-0.024312	0.133274	2.39449	0	0	1
																				12	ENSDARG00000016494	ddc	-0.262582	-0.852269	-1.74503	0	0	0		21	ENSDARG00000000068	slc9a3r1a	0.080448	0.112885	0.274063	0	0	0
																				12	ENSDARG00000070021	cyp3c4	0.169834	-0.947875	-2.10366	0	0	1		21	ENSDARG00000099819	sb:cb1058	-0.121004	0.11213	0.138019	0	0	0
																				12	ENSDARG00000067848	nmrk2	0.0389757	-0.44317	-2.70883	0	0	1		21	ENSDARG00000063076	atrip	-0.733355	0.0617565	0.331678	0	0	0
																				12	ENSDARG00000069941	tdp2a	0.1475	-1.27075	-4.06863	0	0	1		21	ENSDARG00000032155	ppm1aa	0.00266437	0.0589821	0.621225	0	0	0
																														21	ENSDARG00000037159	oprd1b	-0.0947764	0.0455626	1.73555	0	0	0
																														21	ENSDARG00000027200	gabarapl2	-0.143858	0.0403675	0.39763	0	0	0
																														21	ENSDARG00000053831	vtnb	-0.332048	0.0290175	0.338226	0	0	0
																														21	ENSDARG00000038199	cdab	0.172661	-0.00658278	0.488719	0	0	0
																														21	ENSDARG00000025914	si:dkey-190g11.3	0.818292	-0.0237078	-0.482361	0	0	0
																														21	ENSDARG00000075886	vwa5b2	0.0232294	-0.062357	0.60359	0	0	0
																														21	ENSDARG00000103106	trappc9	-0.180167	-0.07098	1.07316	0	0	0
																														21	ENSDARG00000074771	ifngr1	-0.229189	-0.0868656	-1.14443	0	0	0
																														21	ENSDARG00000056239	tmem45b	-0.12415	-0.103666	-0.624032	0	0	0
																														21	ENSDARG00000095152	si:ch211-255i3.4	0.0495346	-0.12682	-0.0327769	0	0	0
																														21	ENSDARG00000104538	tmem184a	-0.0959779	-0.47592	0.187102	0	0	0
																														21	ENSDARG00000038296	tmem86b	0.0579449	-0.660541	-1.33398	0	0	0
																														21	ENSDARG00000076765	ddhd2	-0.712647	-0.661877	0.937804	0	0	0
																														21	ENSDARG00000071116	eepd1	-0.100971	-0.78245	0.352257	0	0	0
																														21	ENSDARG00000059743	tmem98	-0.280134	-0.81801	-1.15383	0	0	0
																														21	ENSDARG00000086740	phyh	-0.058082	-0.946627	0.0151023	0	0	0
																														21	ENSDARG00000104207	pcyt1bb	-0.0169243	-1.25831	0.211376	0	0	0
																														21	ENSDARG00000073704	si:dkeyp-72g9.4	-0.108213	-1.54766	-0.622748	0	0	0
																														21	ENSDARG00000039211	zgc:77439	0.753865	-1.67202	-0.953775	0	0	0

## Sheet: ionocytes (0,2,15)
ionocytes	ensembl_gene_id	gene	hnf4gCV2.vs.WTCV2 log2	hnf4aCV1.vs.WTCV1 log2	hnf4a_hnf4gCR3.vs.WTCR3 log2	hnf4gCV2.vs.WTCV2 significant	hnf4aCV1.vs.WTCV1 significant	hnf4a_hnf4gCR3.vs.WTCR3 significant		ionocytes	ensembl_gene_id	gene	hnf4gCV2.vs.WTCV2 log2	hnf4aCV1.vs.WTCV1 log2	hnf4a_hnf4gCR3.vs.WTCR3 log2	hnf4gCV2.vs.WTCV2 significant	hnf4aCV1.vs.WTCV1 significant	hnf4a_hnf4gCR3.vs.WTCR3 significant		ionocytes	ensembl_gene_id	gene	hnf4gCV2.vs.WTCV2 log2	hnf4aCV1.vs.WTCV1 log2	hnf4a_hnf4gCR3.vs.WTCR3 log2	hnf4gCV2.vs.WTCV2 significant	hnf4aCV1.vs.WTCV1 significant	hnf4a_hnf4gCR3.vs.WTCR3 significant
0	ENSDARG00000023217	crema	-0.120367	0.372342	1.79754	0	0	1		2	ENSDARG00000058734	prdx1	-0.950381	2.99205	5.79607	0	1	1		15	ENSDARG00000092362	hsp70.2	-1.80851	3.73309	5.70002	0	1	1
0	ENSDARG00000027822	tmtops2b	-1.4618	1.26155	1.64675	0	0	0		2	ENSDARG00000019236	gsr	-0.178478	2.32119	4.11817	0	1	1		15	ENSDARG00000021924	hsp70.3	-2.16398	3.77192	5.59761	0	1	1
0	ENSDARG00000023484	rflna	-0.198898	1.09571	1.29889	0	0	0		2	ENSDARG00000071065	g6pd	-0.0612989	2.27544	2.88884	0	1	1		15	ENSDARG00000029688	hsp70.1	-1.66891	3.33046	5.27354	0	1	1
0	ENSDARG00000056619	arhgap42a	-0.10023	1.069	1.29334	0	0	0		2	ENSDARG00000096037	si:ch211-214j24.14	-0.320595	2.05167	0.460546	0	1	0		15	ENSDARG00000055723	hsp70l	-1.24411	3.48484	4.69199	0	1	1
0	ENSDARG00000002909	tjp3	-0.0330207	0.239874	1.18633	0	0	0		2	ENSDARG00000112234	endouc	-0.140491	1.85384	1.99381	0	1	1		15	ENSDARG00000024746	hsp90aa1.2	-1.12108	2.74986	3.56965	0	1	1
0	ENSDARG00000099283	epb41a	0.0394368	0.752991	1.18455	0	0	0		2	ENSDARG00000093124	scpp8	-1.18661	1.79104	0.0815854	0	1	0		15	ENSDARG00000051762	CABZ01080568.1	-0.891429	1.76021	3.37345	0	1	1
0	ENSDARG00000031756	mef2aa	0.104246	0.988676	1.1751	0	0	0		2	ENSDARG00000077549	aifm2	-0.258419	1.42745	2.86957	0	0	1		15	ENSDARG00000103511	zfand2a	-0.169816	0.529962	2.76203	0	0	1
0	ENSDARG00000056649	htatsf1	-0.129468	0.980103	1.16953	0	0	0		2	ENSDARG00000055974	tpmt.1	0.00557192	1.32508	1.69551	0	0	0		15	ENSDARG00000102937	hspbp1	-0.133344	1.64881	1.75379	0	0	1
0	ENSDARG00000003320	fam91a1	-0.206343	0.77245	1.04357	0	0	0		2	ENSDARG00000004754	hspa4a	-0.379021	1.29586	2.5848	0	0	1		15	ENSDARG00000041394	dnajb1b	-0.488348	1.51341	1.68782	0	0	0
0	ENSDARG00000042534	rsrc2	-0.1663	0.751722	1.04111	0	0	0		2	ENSDARG00000021059	alas1	-0.797397	1.27555	0.895642	0	0	0		15	ENSDARG00000019834	edrf1	-0.276382	1.02249	1.28559	0	0	0
0	ENSDARG00000042518	hipk2	0.0212153	0.105618	1.04018	0	0	0		2	ENSDARG00000002196	bach1b	0.125658	1.09753	1.42335	0	0	0		15	ENSDARG00000096721	si:rp71-1c10.11	-0.486914	1.39785	1.12513	0	0	0
0	ENSDARG00000101903	zfyve9a	-0.0287432	0.929505	0.979399	0	0	0		2	ENSDARG00000039579	cfd	0.0574248	0.97362	1.00675	0	0	0		15	ENSDARG00000006514	her6	-0.0322734	1.33782	1.03043	0	0	0
0	ENSDARG00000055124	ccnl1a	0.0779727	0.608841	0.867371	0	0	0		2	ENSDARG00000007323	chmp4bb	-0.318213	0.89651	1.23249	0	0	0		15	ENSDARG00000002369	UBB	0.118641	0.137852	0.850173	0	0	0
0	ENSDARG00000057234	chtopa	-0.255963	0.700133	0.811609	0	0	0		2	ENSDARG00000098746	dhrs13l1	-0.264575	0.873164	1.66812	0	0	0		15	ENSDARG00000039486	bag3	-0.0379794	0.338813	0.811288	0	0	0
0	ENSDARG00000031302	smap1	0.0299057	0.521665	0.784509	0	0	0		2	ENSDARG00000075952	mbd2	0.0645177	0.856084	1.02293	0	0	0		15	ENSDARG00000097533	BX571880.1	-0.272468	-0.443502	0.738445	0	0	0
0	ENSDARG00000043283	prrg1	-0.0878309	1.29784	0.729901	0	0	0		2	ENSDARG00000018524	midn	-0.0324235	0.823364	1.82237	0	0	1		15	ENSDARG00000041623	mt2	-0.651384	0.501048	0.122668	0	0	0
0	ENSDARG00000014488	ca2	0.160006	0.491602	0.715309	0	0	0		2	ENSDARG00000013095	gclc	-0.165553	0.80587	1.7962	0	0	1		15	ENSDARG00000042293	ca4b	0.538966	-0.313942	0.0169234	0	0	0
0	ENSDARG00000078992	wnk1a	-0.0908899	0.0577074	0.713911	0	0	0		2	ENSDARG00000033285	gsto2	0.0690149	0.804415	3.34947	0	0	1		15	ENSDARG00000030440	rsrp1	-0.228262	0.633707	0.00832872	0	0	0
0	ENSDARG00000060238	uacab	0.280725	0.837651	0.711	0	0	0		2	ENSDARG00000100374	txnrd3	-0.247483	0.653893	1.05975	0	0	0		15	ENSDARG00000104301	zgc:193726	0.324279	0.00515238	-0.204154	0	0	0
0	ENSDARG00000105209	MPRIP	0.0674581	0.32047	0.704215	0	0	0		2	ENSDARG00000117489	CU896647.1	0.377569	0.618824	1.37823	0	0	0		15	ENSDARG00000104568	BX571715.1	-0.234693	0.349063	-0.822729	0	0	0
0	ENSDARG00000058946	CU856539.2	-0.130878	0.0215788	0.655769	0	0	0		2	ENSDARG00000005220	pdcd6	-0.301569	0.570272	1.2571	0	0	0		15	ENSDARG00000010658	insig1	-0.00439493	-1.07866	-1.43959	0	0	0
0	ENSDARG00000094386	adgrg4b	-0.0761281	0.886729	0.617879	0	0	0		2	ENSDARG00000102887	abhd4	-0.0740624	0.471333	1.51194	0	0	0
0	ENSDARG00000075349	si:ch73-138n13.1	-0.0360627	0.325148	0.50348	0	0	0		2	ENSDARG00000023989	pef1	-0.0866489	0.465697	1.09822	0	0	0
0	ENSDARG00000054666	pgpep1	-0.10266	0.502445	0.494987	0	0	0		2	ENSDARG00000076221	fthl28	0.250816	0.403088	4.56987	0	0	1
0	ENSDARG00000097137	CR753876.1	-0.124564	-1.01379	0.415347	0	0	0		2	ENSDARG00000098813	stx12	-0.119901	0.394287	0.668621	0	0	0
0	ENSDARG00000024964	patj	0.0400208	0.0749194	0.356262	0	0	0		2	ENSDARG00000033609	map1lc3a	0.0405612	0.360689	0.495911	0	0	0
0	ENSDARG00000004930	lmo7a	0.0810835	0.207312	0.307272	0	0	0		2	ENSDARG00000102720	zgc:123284	-0.480875	0.322608	2.39244	0	0	1
0	ENSDARG00000076805	leng8	-0.0718861	0.467181	0.282789	0	0	0		2	ENSDARG00000112049	cldn15a	-0.0310816	0.243264	0.219113	0	0	0
0	ENSDARG00000078270	CU467961.1	-0.0518315	-0.347748	0.0475281	0	0	0		2	ENSDARG00000022183	gsto1	0.296722	0.221452	0.653663	0	0	0
0	ENSDARG00000014031	abcc2	0.13429	0.177079	0.0214024	0	0	0		2	ENSDARG00000098153	lhfpl2b	-0.000552345	0.191301	1.72803	0	0	0
0	ENSDARG00000078060	syt7b	0.406069	-0.99811	-0.0668161	0	0	0		2	ENSDARG00000104213	si:dkey-283b1.6	-0.214763	0.113997	-1.43378	0	0	0
0	ENSDARG00000116197	si:dkeyp-4c4.2	0.00600844	-0.274882	-0.10133	0	0	0		2	ENSDARG00000077383	anxa11a	-0.012052	0.0563624	0.537523	0	0	0
0	ENSDARG00000074575	ppp1r9alb	-0.148759	0.365017	-0.126021	0	0	0		2	ENSDARG00000011170	ndrg2	-0.186218	0.050926	0.921155	0	0	0
0	ENSDARG00000028676	nuak1b	-0.183119	0.47148	-0.198838	0	0	0		2	ENSDARG00000058332	krt18a.2	-0.0333049	-0.367509	-8.05545	0	0	1
0	ENSDARG00000043281	stap2b	0.0699294	0.040216	-0.542918	0	0	0		2	ENSDARG00000016867	rnf128a	-0.162201	-0.386663	-0.983615	0	0	0
										2	ENSDARG00000038006	osr2	-0.069011	-0.464435	-0.927589	0	0	0

## Sheet: secretory precursors (6)
secretory precursor	ensembl_gene_id	gene	hnf4gCV2.vs.WTCV2 log2	hnf4aCV1.vs.WTCV1 log2	hnf4a_hnf4gCR3.vs.WTCR3 log2	hnf4gCV2.vs.WTCV2 significant	hnf4aCV1.vs.WTCV1 significant	hnf4a_hnf4gCR3.vs.WTCR3 significant
6	ENSDARG00000036721	tomm40l	-0.452624	0.929382	2.23454	0	0	1
6	ENSDARG00000099865	hnrnpabb	-0.103409	0.943235	1.69558	0	0	0
6	ENSDARG00000024561	nolc1	-0.0518782	0.833991	1.3472	0	0	0
6	ENSDARG00000039887	c1qbp	-0.210602	1.07999	1.33696	0	0	0
6	ENSDARG00000038768	mrpl12	-0.306772	1.0939	1.15732	0	0	0
6	ENSDARG00000029252	ssb	-0.198216	0.993405	1.13478	0	0	0
6	ENSDARG00000006219	gnl3	0.0223097	0.920423	1.0548	0	0	0
6	ENSDARG00000016484	dkc1	-0.0482843	0.86768	1.04899	0	0	0
6	ENSDARG00000069422	nhp2	-0.108707	1.00381	1.03205	0	0	0
6	ENSDARG00000104353	nop58	0.0189467	0.905502	1.0249	0	0	0
6	ENSDARG00000104708	ddx24	-0.0738122	0.791479	0.988986	0	0	0
6	ENSDARG00000015524	prps1a	-0.0787819	0.894655	0.982094	0	0	0
6	ENSDARG00000040666	nifk	-0.0113446	0.654323	0.955817	0	0	0
6	ENSDARG00000023299	snu13b	-0.168948	1.13624	0.895792	0	0	0
6	ENSDARG00000045776	cnbpa	-0.0752136	0.742091	0.864446	0	0	0
6	ENSDARG00000007130	mrto4	-0.0308012	0.75283	0.735166	0	0	0
6	ENSDARG00000104227	nop10	-0.10119	0.720423	0.723187	0	0	0
6	ENSDARG00000103594	npm3	-0.203014	0.840191	0.681502	0	0	0
6	ENSDARG00000014329	npm1a	-0.177493	1.08603	0.656478	0	0	0
6	ENSDARG00000059075	nip7	0.127323	0.776782	0.365244	0	0	0
6	ENSDARG00000012820	nop56	0.0769143	0.187649	0.190271	0	0	0
6	ENSDARG00000098334	exosc3	0.252664	0.564409	-0.682442	0	0	0

## Sheet: exocrine pancreas (20)
exocrine pancreas	ensembl_gene_id	gene	hnf4gCV2.vs.WTCV2 log2	hnf4aCV1.vs.WTCV1 log2	hnf4a_hnf4gCR3.vs.WTCR3 log2	hnf4gCV2.vs.WTCV2 significant	hnf4aCV1.vs.WTCV1 significant	hnf4a_hnf4gCR3.vs.WTCR3 significant
20	ENSDARG00000103846	hspa5	-1.07688	1.22038	2.9568	0	0	1
20	ENSDARG00000004621	gpm6ab	0.00118324	2.43142	2.26272	0	1	1
20	ENSDARG00000003570	hsp90b1	-0.942068	0.200444	2.16145	0	0	1
20	ENSDARG00000029071	creld2	-0.926896	0.361126	2.15779	0	0	1
20	ENSDARG00000104105	ttf2	-0.514013	1.96	1.96115	0	1	1
20	ENSDARG00000074727	dnajc10	-0.12237	1.05349	1.92647	0	0	1
20	ENSDARG00000000551	slc1a4	-0.414347	1.83164	1.78585	0	1	1
20	ENSDARG00000019417	gadd45ga	-0.545123	1.38301	1.73428	0	0	0
20	ENSDARG00000029761	mpp6b	-0.433051	1.26553	1.5977	0	0	0
20	ENSDARG00000094345	si:dkey-261l7.2	-0.361627	0.169277	1.47088	0	0	0
20	ENSDARG00000018124	psmd3	-0.200733	0.500415	1.46783	0	0	0
20	ENSDARG00000093374	EPB41L2	0.0412237	0.637481	1.45882	0	0	0
20	ENSDARG00000045857	cebpz	0.0263895	0.814333	1.33783	0	0	0
20	ENSDARG00000018259	atp1a3a	-0.0862374	0.557333	1.33641	0	0	0
20	ENSDARG00000055455	gpm6aa	0.0581808	-0.286171	1.22346	0	0	0
20	ENSDARG00000031720	clstn1	-0.0926759	0.481799	1.21832	0	0	0
20	ENSDARG00000054804	anp32e	-0.0160595	0.706879	1.16016	0	0	0
20	ENSDARG00000101458	r3hdm1	-0.116252	0.890024	1.12173	0	0	0
20	ENSDARG00000015314	zc4h2	-0.165609	0.665121	1.09153	0	0	0
20	ENSDARG00000015793	creb3l1	0.691332	0.7256	1.06328	0	0	0
20	ENSDARG00000092798	ppib	-0.0390944	0.128929	1.06038	0	0	0
20	ENSDARG00000071424	ap3d1	-0.0258649	0.610708	1.05464	0	0	0
20	ENSDARG00000055900	zswim5	0.0654769	0.492696	1.0301	0	0	0
20	ENSDARG00000059373	dnajc8	-0.10757	0.356628	1.0168	0	0	0
20	ENSDARG00000029612	gpkow	-0.0151904	0.736228	0.992341	0	0	0
20	ENSDARG00000055389	si:dkey-67c22.2	-0.0177475	0.701494	0.987252	0	0	0
20	ENSDARG00000105131	cog1	-0.162528	0.290873	0.947892	0	0	0
20	ENSDARG00000004074	bach2b	-0.0226568	0.723031	0.944012	0	0	0
20	ENSDARG00000038213	slc35b1	-0.341949	0.319216	0.935911	0	0	0
20	ENSDARG00000024306	zbed4	-0.0017551	0.641821	0.893315	0	0	0
20	ENSDARG00000014498	ythdf2	-0.104985	0.672737	0.887912	0	0	0
20	ENSDARG00000058117	snap25b	-0.0443008	0.809856	0.882825	0	0	0
20	ENSDARG00000062139	eif2ak3	-0.146475	0.126916	0.856631	0	0	0
20	ENSDARG00000032037	bet1l	-0.0531025	0.782742	0.790658	0	0	0
20	ENSDARG00000054746	uggt1	-0.405667	-0.149466	0.690687	0	0	0
20	ENSDARG00000098194	SLC39A11	-0.14937	-0.253442	0.650762	0	0	0
20	ENSDARG00000020645	slc7a3a	0.498022	1.20807	0.597834	0	0	0
20	ENSDARG00000055086	ggnbp2	-0.0281791	0.317095	0.588099	0	0	0
20	ENSDARG00000097718	stard10	-0.131491	0.704325	0.575118	0	0	0
20	ENSDARG00000093205	AL845362.1	0.148681	0.493397	0.55208	0	0	0
20	ENSDARG00000012572	polr3f	-0.0614892	0.742557	0.547779	0	0	0
20	ENSDARG00000036295	golga7ba	-0.408081	1.29678	0.540609	0	0	0
20	ENSDARG00000017673	nova2	0.0237214	0.467975	0.531417	0	0	0
20	ENSDARG00000098639	pycr1b	-0.0057246	0.962463	0.499466	0	0	0
20	ENSDARG00000054031	mxd4	-0.149649	0.28347	0.461916	0	0	0
20	ENSDARG00000059804	retreg3	-0.121313	0.106132	0.445062	0	0	0
20	ENSDARG00000101627	ssr1	-0.1291	-0.0001933	0.436342	0	0	0
20	ENSDARG00000041110	dnajc3a	-0.372947	-0.265267	0.419029	0	0	0
20	ENSDARG00000001910	rorab	-0.165071	-0.265067	0.358838	0	0	0
20	ENSDARG00000055837	arhgef1b	-0.0589523	0.617278	0.34251	0	0	0
20	ENSDARG00000077880	si:ch211-255i20.3	0.0497528	-0.404291	0.332848	0	0	0
20	ENSDARG00000018263	pdia2	-0.0614659	-0.400762	0.297421	0	0	0
20	ENSDARG00000102640	pdia3	0.0524988	-0.350535	0.0808861	0	0	0
20	ENSDARG00000037121	mat2ab	0.142923	-0.240603	0.0689697	0	0	0
20	ENSDARG00000069242	pdia5	-0.117575	0.0324938	-0.145906	0	0	0
20	ENSDARG00000030915	cpa1	0.327292	-1.88446	-0.14804	0	1	0
20	ENSDARG00000014479	ptf1a	-0.199125	0.618353	-0.161092	0	0	0
20	ENSDARG00000073742	prss59.2	0.101531	-0.677086	-0.224957	0	0	0
20	ENSDARG00000032856	ccdc120	-0.124953	-0.65687	-0.3523	0	0	0
20	ENSDARG00000010878	cdkn1ca	0.0662366	0.498547	-0.386372	0	0	0
20	ENSDARG00000042993	prss1	0.17692	-1.13732	-0.416855	0	0	0
20	ENSDARG00000013856	amy2a	0.241331	-1.73665	-0.579591	0	0	0
20	ENSDARG00000006766	snd1	0.165546	-0.504795	-0.591454	0	0	0
20	ENSDARG00000045442	cpb1	0.274677	-1.05984	-0.702664	0	0	0
20	ENSDARG00000007276	ela3l	0.0193899	-1.67236	-0.809394	0	0	0
20	ENSDARG00000025311	cuzd1.2	-0.155855	-0.202527	-0.992709	0	0	0
20	ENSDARG00000075444	cgref1	-0.0414352	-0.756856	-1.26042	0	0	0
20	ENSDARG00000089050	cuzd1.1	-0.439828	-0.155636	-2.23337	0	0	1

## Sheet: foregut epithelium (1,7,10)
foregut epithelium	ensembl_gene_id	gene	hnf4gCV2.vs.WTCV2 log2	hnf4aCV1.vs.WTCV1 log2	hnf4a_hnf4gCR3.vs.WTCR3 log2	hnf4gCV2.vs.WTCV2 significant	hnf4aCV1.vs.WTCV1 significant	hnf4a_hnf4gCR3.vs.WTCR3 significant		foregut epithelium	ensembl_gene_id	gene	hnf4gCV2.vs.WTCV2 log2	hnf4aCV1.vs.WTCV1 log2	hnf4a_hnf4gCR3.vs.WTCR3 log2	hnf4gCV2.vs.WTCV2 significant	hnf4aCV1.vs.WTCV1 significant	hnf4a_hnf4gCR3.vs.WTCR3 significant		foregut epithelium	ensembl_gene_id	gene	hnf4gCV2.vs.WTCV2 log2	hnf4aCV1.vs.WTCV1 log2	hnf4a_hnf4gCR3.vs.WTCR3 log2	hnf4gCV2.vs.WTCV2 significant	hnf4aCV1.vs.WTCV1 significant	hnf4a_hnf4gCR3.vs.WTCR3 significant
1	ENSDARG00000003808	aqp3a	0.326331	2.03116	1.98751	0	1	1		7	ENSDARG00000102433	sytl4	0.0405277	0.745789	1.53662	0	0	0		10	ENSDARG00000101479	BX908782.2	-2.19835	3.04168	1.33398	1	1	0
1	ENSDARG00000090401	CABZ01020840.1	-0.871296	1.25987	1.6049	0	0	0		7	ENSDARG00000009978	icn	0.189711	0.988999	1.4316	0	0	0		10	ENSDARG00000010276	ptgs2b	-0.480281	2.53048	1.15667	0	1	0
1	ENSDARG00000057035	stoml3b	0.0705901	-0.404466	-0.519858	0	0	0		7	ENSDARG00000008553	zgc:136872	0.0708373	-0.605742	0.58033	0	0	0		10	ENSDARG00000033227	lect2l	-1.3332	2.16817	-0.942361	0	1	0
1	ENSDARG00000043729	plac8.1	-0.404033	-0.230199	-0.559066	0	0	0		7	ENSDARG00000032802	ktn1	0.214778	-0.226935	-0.466842	0	0	0		10	ENSDARG00000004539	ptgs2a	-0.299236	2.1593	1.07886	0	1	0
1	ENSDARG00000038694	zgc:101744	0.294431	-0.99769	-1.2101	0	0	0		7	ENSDARG00000097635	wu:fb18f06	-0.17522	0.298951	-0.895377	0	0	0		10	ENSDARG00000069453	zgc:113314	-1.04506	1.87072	0.775352	0	1	0
1	ENSDARG00000112575	CU467905.1	-0.376457	0.61112	-1.35138	0	0	0		7	ENSDARG00000058327	neu3.3	-0.281317	-0.126736	-1.50289	0	0	0		10	ENSDARG00000105590	si:cabz01007794.1	0.346368	1.67886	0.960956	0	0	0
1	ENSDARG00000104028	si:dkey-74k8.3	0.440372	-0.736241	-1.44922	0	0	0		7	ENSDARG00000078489	si:ch211-284d12.3	-0.691745	0.3654	-1.50971	0	0	0		10	ENSDARG00000060471	gcnt3	-0.0932666	1.66543	2.37611	0	0	1
1	ENSDARG00000037425	s100a10a	0.389678	-0.715342	-2.08261	0	0	1												10	ENSDARG00000001909	vill	0.257328	1.6358	1.92183	0	0	1
																				10	ENSDARG00000030914	tmem120a	-0.288551	1.59277	2.30814	0	0	1
																				10	ENSDARG00000091699	capn2a	-0.0541706	1.55668	1.5457	0	0	0
																				10	ENSDARG00000090190	bcam	0.293593	1.49715	1.64877	0	0	0
																				10	ENSDARG00000097503	si:ch73-288o11.5	0.263186	1.44116	1.9281	0	0	1
																				10	ENSDARG00000029356	mboat1	-0.0245612	1.3707	1.99987	0	0	1
																				10	ENSDARG00000015654	ca15a	0.796915	1.36744	0.119643	0	0	0
																				10	ENSDARG00000103034	CABZ01068499.1	0.344286	1.31732	1.79926	0	0	1
																				10	ENSDARG00000002445	prdm1a	-0.125503	1.27503	1.40054	0	0	0
																				10	ENSDARG00000057121	c7b	-2.12676	1.22256	1.16254	0	0	0
																				10	ENSDARG00000014577	rhpn2	0.169384	1.08996	1.00547	0	0	0
																				10	ENSDARG00000078643	vtcn1	0.0188505	1.08098	2.12851	0	0	1
																				10	ENSDARG00000020761	arrdc2	0.0984524	0.894371	0.842877	0	0	0
																				10	ENSDARG00000018787	efna1b	0.0190898	0.892413	0.408426	0	0	0
																				10	ENSDARG00000034240	capza1a	-0.12652	0.818823	0.769504	0	0	0
																				10	ENSDARG00000099470	muc5.3	-0.0347113	0.811412	2.02356	0	0	1
																				10	ENSDARG00000097959	si:dkey-248g15.3	0.40622	0.748318	0.668709	0	0	0
																				10	ENSDARG00000060498	tnfrsf9a	-1.39256	0.660617	1.57188	0	0	0
																				10	ENSDARG00000054864	aplp2	0.0343857	0.496525	1.46719	0	0	0
																				10	ENSDARG00000040009	palld	0.0842001	0.182102	0.112978	0	0	0
																				10	ENSDARG00000001880	stx3a	-0.0384403	0.0933442	0.724328	0	0	0
																				10	ENSDARG00000103457	spartb	-0.234708	-0.104729	-0.487045	0	0	0
																				10	ENSDARG00000062278	si:dkey-202e17.1	-0.0331143	-0.108951	-1.01231	0	0	0
																				10	ENSDARG00000114554	cdx1a	-0.461382	-0.48345	-1.22531	0	0	0
																				10	ENSDARG00000086826	sult6b1	0.26502	-0.578941	-1.6003	0	0	0

## Sheet: leukocytes (18)
leukocytes	ensembl_gene_id	gene	hnf4gCV2.vs.WTCV2 log2	hnf4aCV1.vs.WTCV1 log2	hnf4a_hnf4gCR3.vs.WTCR3 log2	hnf4gCV2.vs.WTCV2 significant	hnf4aCV1.vs.WTCV1 significant	hnf4a_hnf4gCR3.vs.WTCR3 significant
18	ENSDARG00000008541	chia.4	-0.452739	0.721456	2.27147	0	0	1
18	ENSDARG00000033516	efr3ba	0.00483071	1.11738	2.21007	0	0	1
18	ENSDARG00000103466	ccl35.1	-0.562922	0.828937	2.14997	0	0	1
18	ENSDARG00000099980	bpifcl	-0.422041	-0.0033034	2.11867	0	0	1
18	ENSDARG00000103319	si:ch73-359m17.7	-0.232039	1.32592	1.99284	0	0	1
18	ENSDARG00000056008	atp5mc1	-0.496004	0.885598	1.8666	0	0	1
18	ENSDARG00000073970	mctp2b	-0.132832	0.0335361	1.77364	0	0	1
18	ENSDARG00000103207	rab11fip4b	-0.0177084	1.48979	1.61297	0	0	0
18	ENSDARG00000077559	LO017815.1	-0.0463284	1.24446	1.54616	0	0	0
18	ENSDARG00000091902	b3gnt2b	-0.0032366	0.756436	1.51268	0	0	0
18	ENSDARG00000045898	si:ch211-152c2.3	-0.0246148	1.06014	1.48619	0	0	0
18	ENSDARG00000044694	fybb	-0.105032	0.52105	1.42085	0	0	0
18	ENSDARG00000062590	pleca	0.099806	0.526244	1.40433	0	0	0
18	ENSDARG00000005355	larp6a	-0.069311	0.996971	1.39019	0	0	0
18	ENSDARG00000041570	mrpl39	-0.247997	0.848069	1.38466	0	0	0
18	ENSDARG00000016505	apbb1ip	-0.0239124	0.616387	1.35231	0	0	0
18	ENSDARG00000086762	gsdmea	-0.933338	2.10866	1.34591	0	1	0
18	ENSDARG00000058348	scinlb	-0.223872	0.491941	1.34586	0	0	0
18	ENSDARG00000074656	ctss2.1	-0.318111	0.816439	1.30207	0	0	0
18	ENSDARG00000036179	myo1ea	0.111192	0.525083	1.29234	0	0	0
18	ENSDARG00000027590	2020-09-02	-0.220873	1.17184	1.28285	0	0	0
18	ENSDARG00000067672	card9	-0.932001	1.51256	1.28061	0	0	0
18	ENSDARG00000103966	si:ch211-156b7.5	-0.601953	0.444044	1.2403	0	0	0
18	ENSDARG00000099332	ly6m5	-0.0514749	1.65972	1.22572	0	0	0
18	ENSDARG00000055290	mpeg1.1	-0.305384	0.540643	1.2202	0	0	0
18	ENSDARG00000023648	idh3g	-0.16873	0.895929	1.20901	0	0	0
18	ENSDARG00000033437	rps6ka1	-0.137956	0.0528972	1.20877	0	0	0
18	ENSDARG00000056615	cybb	-0.675619	1.49427	1.19146	0	0	0
18	ENSDARG00000032372	ccdc180	-0.925048	1.18438	1.18581	0	0	0
18	ENSDARG00000045928	psma4	-0.288589	0.236973	1.18339	0	0	0
18	ENSDARG00000002240	psmb6	-0.30582	0.560756	1.1793	0	0	0
18	ENSDARG00000041959	cxcr4b	-0.0763242	0.793133	1.1761	0	0	0
18	ENSDARG00000057882	arpc3	-0.229704	0.816401	1.17319	0	0	0
18	ENSDARG00000037506	prps1b	-0.293575	0.948882	1.16249	0	0	0
18	ENSDARG00000046143	prkab1b	-0.126829	0.666004	1.16141	0	0	0
18	ENSDARG00000060445	elp6	-0.117455	0.85667	1.12745	0	0	0
18	ENSDARG00000018283	cyba	-0.432424	0.984868	1.11562	0	0	0
18	ENSDARG00000069624	mrps18c	-0.337337	0.933067	1.11222	0	0	0
18	ENSDARG00000017274	opn1sw2	0.148788	0.939417	1.09605	0	0	0
18	ENSDARG00000104031	mrpl33	-0.211467	0.969703	1.08728	0	0	0
18	ENSDARG00000019062	arpc5b	-0.141925	0.911514	1.08369	0	0	0
18	ENSDARG00000076618	tm2d3	-0.16526	0.54049	1.06889	0	0	0
18	ENSDARG00000009534	wls	0.215863	1.22244	1.06802	0	0	0
18	ENSDARG00000092889	zgc:194246	0.393722	1.07077	1.06416	0	0	0
18	ENSDARG00000002790	ap2m1a	-0.18774	0.740594	1.0322	0	0	0
18	ENSDARG00000067797	spi1a	-0.653112	1.10834	1.02298	0	0	0
18	ENSDARG00000014490	tac1	-0.0221032	0.246562	1.00739	0	0	0
18	ENSDARG00000023188	lcp1	-0.515293	0.569893	0.996136	0	0	0
18	ENSDARG00000030716	ing4	-0.0088928	1.1712	0.988312	0	0	0
18	ENSDARG00000028618	krt18b	0.053827	1.19788	0.988095	0	0	0
18	ENSDARG00000071084	wipf1b	-0.1461	0.860764	0.980438	0	0	0
18	ENSDARG00000013335	anxa6	0.178894	0.881146	0.958297	0	0	0
18	ENSDARG00000039265	arhgap4a	-0.258864	0.70504	0.942317	0	0	0
18	ENSDARG00000087438	spi2	-0.71987	0.391142	0.932048	0	0	0
18	ENSDARG00000068650	fam214b	0.108179	0.798166	0.931939	0	0	0
18	ENSDARG00000025859	lmf2b	-0.350312	-0.0838951	0.930768	0	0	0
18	ENSDARG00000094277	mrpl44	-0.106879	0.779075	0.929401	0	0	0
18	ENSDARG00000074967	zgc:162698	-0.170829	0.802074	0.920996	0	0	0
18	ENSDARG00000054063	arpc4	-0.192164	0.873791	0.911991	0	0	0
18	ENSDARG00000005891	cyb5r3	-0.113594	0.423967	0.89785	0	0	0
18	ENSDARG00000056331	ahcyl1	-0.234054	0.608278	0.896422	0	0	0
18	ENSDARG00000103994	ppiab	-0.0559309	0.306851	0.878337	0	0	0
18	ENSDARG00000000690	sypl2b	-0.0727903	1.81808	0.877898	0	1	0
18	ENSDARG00000058893	nhej1	-0.214433	0.593861	0.875961	0	0	0
18	ENSDARG00000060366	slc12a9	-0.109448	1.15874	0.869712	0	0	0
18	ENSDARG00000023578	lpp	0.0800958	0.32578	0.860479	0	0	0
18	ENSDARG00000006370	atp6v1h	-0.384924	0.679566	0.855227	0	0	0
18	ENSDARG00000002877	reps1	0.0008686	0.830743	0.825622	0	0	0
18	ENSDARG00000071251	ppp1r18	-0.496258	0.843382	0.825364	0	0	0
18	ENSDARG00000021521	rgs14a	-0.393746	1.4218	0.823997	0	0	0
18	ENSDARG00000088283	si:ch73-248e21.5	-0.371797	0.969895	0.82032	0	0	0
18	ENSDARG00000036675	hnrnpa1b	-0.194924	0.604677	0.81141	0	0	0
18	ENSDARG00000014898	ncbp2	-0.311922	0.762994	0.810762	0	0	0
18	ENSDARG00000026072	pdcd5	-0.0631576	0.695658	0.802806	0	0	0
18	ENSDARG00000069114	unc93b1	0.144834	0.348961	0.795259	0	0	0
18	ENSDARG00000017504	si:ch211-1o7.3	-0.185086	-0.134193	0.788033	0	0	0
18	ENSDARG00000019033	tmem59	-0.0716251	0.462072	0.779961	0	0	0
18	ENSDARG00000067566	sftpbb	-0.324308	0.802369	0.778231	0	0	0
18	ENSDARG00000070826	bpgm	0.111539	0.805053	0.764676	0	0	0
18	ENSDARG00000060860	pstpip1a	-0.770362	0.989238	0.762624	0	0	0
18	ENSDARG00000078363	mcoln3a	-0.15352	2.24156	0.761686	0	1	0
18	ENSDARG00000058038	eml3	0.0376028	0.945341	0.749327	0	0	0
18	ENSDARG00000103483	litaf	-0.220296	1.02331	0.74543	0	0	0
18	ENSDARG00000089838	si:dkey-262k9.4	-0.133574	0.881183	0.732189	0	0	0
18	ENSDARG00000077026	si:dkey-94e7.1	-0.651983	0.81287	0.731657	0	0	0
18	ENSDARG00000099672	capgb	0.162254	1.23891	0.730876	0	0	0
18	ENSDARG00000101309	si:ch73-100l22.3	-0.164695	0.632147	0.730638	0	0	0
18	ENSDARG00000068233	zgc:64051	-0.5074	0.90049	0.717768	0	0	0
18	ENSDARG00000013575	rfx2	0.124195	0.597085	0.702955	0	0	0
18	ENSDARG00000027063	arpc1b	-0.387307	0.775301	0.69953	0	0	0
18	ENSDARG00000044241	dram2b	-0.211514	0.511171	0.691158	0	0	0
18	ENSDARG00000078430	tiam1a	0.00427013	0.715461	0.681746	0	0	0
18	ENSDARG00000003373	commd2	-0.307832	0.384729	0.680561	0	0	0
18	ENSDARG00000027930	naprt	-0.0965784	0.126455	0.675589	0	0	0
18	ENSDARG00000100383	il10ra	-0.51944	0.456841	0.67266	0	0	0
18	ENSDARG00000001498	skap1	-0.0447556	-0.475504	0.672393	0	0	0
18	ENSDARG00000091813	si:dkey-21a6.5	-0.569554	0.136263	0.67038	0	0	0
18	ENSDARG00000070601	RASSF5	-0.271083	0.926016	0.666803	0	0	0
18	ENSDARG00000033735	ncf1	-0.353145	0.358121	0.659285	0	0	0
18	ENSDARG00000103984	cyth4b	-0.418065	1.13385	0.652952	0	0	0
18	ENSDARG00000099281	si:dkey-112e7.2	0.0845026	0.265229	0.645894	0	0	0
18	ENSDARG00000002131	celf2	0.0814826	0.984844	0.642886	0	0	0
18	ENSDARG00000015807	rab22a	-0.0157141	0.907532	0.638597	0	0	0
18	ENSDARG00000094025	si:dkey-237j10.2	-0.236955	0.511316	0.637763	0	0	0
18	ENSDARG00000101785	laptm5	-0.354417	0.958201	0.607742	0	0	0
18	ENSDARG00000055955	lcp2a	-0.453252	0.261183	0.605629	0	0	0
18	ENSDARG00000044540	fkbp2	-0.269992	0.0445723	0.601891	0	0	0
18	ENSDARG00000103852	pigrl4.2	-0.844691	0.8796	0.601561	0	0	0
18	ENSDARG00000056204	zgc:113436	-0.195993	0.451552	0.600659	0	0	0
18	ENSDARG00000013771	ctss2.2	-0.338016	0.491576	0.596664	0	0	0
18	ENSDARG00000076914	lacc1	-0.736776	1.98538	0.573762	0	1	0
18	ENSDARG00000100529	sh3bp5a	-0.0582265	0.942359	0.567307	0	0	0
18	ENSDARG00000105592	CR936442.1	-0.0542755	-1.4733	0.564269	0	0	0
18	ENSDARG00000037589	gid8b	-0.0549994	0.550404	0.556773	0	0	0
18	ENSDARG00000053152	pcmtd1	-0.103683	0.00706226	0.554786	0	0	0
18	ENSDARG00000016774	plekho2	-0.122027	0.422716	0.548212	0	0	0
18	ENSDARG00000075853	sh3kbp1	-0.42935	0.824307	0.543392	0	0	0
18	ENSDARG00000067711	parvg	-0.423511	0.858429	0.538289	0	0	0
18	ENSDARG00000093750	cd180	-0.675753	0.679271	0.536545	0	0	0
18	ENSDARG00000034956	myclb	0.0274679	0.00592579	0.53471	0	0	0
18	ENSDARG00000076861	tmem79b	0.0327506	0.179448	0.531166	0	0	0
18	ENSDARG00000089383	il1fma	-0.712074	0.632263	0.526407	0	0	0
18	ENSDARG00000010317	gpr183a	0.0360454	0.852563	0.52404	0	0	0
18	ENSDARG00000020929	fam49ba	-0.0645909	0.657896	0.523407	0	0	0
18	ENSDARG00000019081	DHDH	0.221936	-0.412598	0.523382	0	0	0
18	ENSDARG00000070059	si:ch211-262i1.5	-0.523843	0.410189	0.517872	0	0	0
18	ENSDARG00000116649	ube2e1	-0.107181	0.694436	0.509705	0	0	0
18	ENSDARG00000034427	jpt2	0.0164161	0.0171871	0.504923	0	0	0
18	ENSDARG00000067795	ifngr2	-0.328827	0.600764	0.504674	0	0	0
18	ENSDARG00000055349	pknox2	0.184972	0.91364	0.479014	0	0	0
18	ENSDARG00000056281	cyb561a3a	-0.131771	0.364246	0.46279	0	0	0
18	ENSDARG00000035420	ophn1	-0.173386	0.449818	0.46175	0	0	0
18	ENSDARG00000090767	si:ch211-136m16.8	-0.102654	0.914106	0.456179	0	0	0
18	ENSDARG00000051986	ndufs8a	-0.19387	0.696613	0.445303	0	0	0
18	ENSDARG00000012729	hcls1	-0.137942	0.55791	0.44071	0	0	0
18	ENSDARG00000095830	serpinb1l1	-0.0162735	1.13738	0.43763	0	0	0
18	ENSDARG00000055186	ccr9a	0.0254684	-0.237317	0.430101	0	0	0
18	ENSDARG00000000906	skap2	-0.1454	0.29684	0.428893	0	0	0
18	ENSDARG00000013044	ndufv2	-0.0232402	0.224996	0.423676	0	0	0
18	ENSDARG00000029036	rab32a	-0.266173	0.301447	0.415939	0	0	0
18	ENSDARG00000092373	BX005340.1	-1.05342	0.229903	0.412067	0	0	0
18	ENSDARG00000035018	thy1	0.29758	1.24085	0.40598	0	0	0
18	ENSDARG00000004378	yrk	-0.150876	0.994904	0.404598	0	0	0
18	ENSDARG00000078285	pik3ap1	-0.365996	0.691121	0.402192	0	0	0
18	ENSDARG00000102741	sumo2b	-0.0054784	0.683645	0.397169	0	0	0
18	ENSDARG00000020693	sesn1	0.203481	0.187119	0.386356	0	0	0
18	ENSDARG00000041505	itm2bb	-0.119104	0.150173	0.380608	0	0	0
18	ENSDARG00000030938	fermt3b	-0.259099	0.494299	0.374118	0	0	0
18	ENSDARG00000004034	arhgdig	-0.199808	0.460842	0.344419	0	0	0
18	ENSDARG00000103900	sept9b	-0.0631319	0.893471	0.339812	0	0	0
18	ENSDARG00000075592	tnfaip8l2a	-0.217751	0.696344	0.338686	0	0	0
18	ENSDARG00000076090	jakmip1	0.236232	0.531045	0.338552	0	0	0
18	ENSDARG00000075818	dok2	-0.411806	0.678545	0.338105	0	0	0
18	ENSDARG00000052842	ppifb	0.0190565	0.121689	0.328251	0	0	0
18	ENSDARG00000034817	asah1b	-0.292477	0.109048	0.326355	0	0	0
18	ENSDARG00000100649	tlr1	-0.0594366	0.148474	0.32345	0	0	0
18	ENSDARG00000096331	si:ch73-248e21.7	-0.419802	0.955371	0.315127	0	0	0
18	ENSDARG00000007385	cct7	0.0134104	0.465253	0.307468	0	0	0
18	ENSDARG00000108038	CABZ01109481.1	-0.151039	0.179528	0.303961	0	0	0
18	ENSDARG00000040930	deptor	-0.262443	-0.0767096	0.29496	0	0	0
18	ENSDARG00000007438	ube2ib	-0.0698835	0.403335	0.288625	0	0	0
18	ENSDARG00000036785	si:ch211-226m16.2	-0.122019	0.426006	0.288096	0	0	0
18	ENSDARG00000071414	cybc1	-0.420002	0.997311	0.278569	0	0	0
18	ENSDARG00000010423	npsn	-0.225812	2.16743	0.2737	0	1	0
18	ENSDARG00000010384	lpar5a	-0.604562	0.908079	0.269391	0	0	0
18	ENSDARG00000070404	inka1b	0.00734586	0.929616	0.268074	0	0	0
18	ENSDARG00000056233	zgc:110591	-0.0887448	0.507146	0.26308	0	0	0
18	ENSDARG00000006672	fam49a	-0.0574384	0.405067	0.261717	0	0	0
18	ENSDARG00000037870	actb2	0.306457	-0.0477269	0.2462	0	0	0
18	ENSDARG00000039535	dapp1	-0.406866	0.413659	0.229663	0	0	0
18	ENSDARG00000054610	coro1a	-0.413007	0.37347	0.201748	0	0	0
18	ENSDARG00000054842	hsd17b14	-0.333983	0.76948	0.15124	0	0	0
18	ENSDARG00000026350	wasb	0.0352078	0.309589	0.127533	0	0	0
18	ENSDARG00000036637	arl11	0.2078	1.61743	0.118964	0	0	0
18	ENSDARG00000015149	wasa	-0.136597	0.154218	0.111196	0	0	0
18	ENSDARG00000091609	spink4	0.271239	-0.446304	0.0927073	0	0	0
18	ENSDARG00000011459	gsna	-0.298816	0.593512	0.0715363	0	0	0
18	ENSDARG00000058389	ccl19a.1	-0.435871	0.780164	0.0551773	0	0	0
18	ENSDARG00000036106	rgs18	-0.451023	0.293899	0.0493928	0	0	0
18	ENSDARG00000038010	rac2	-0.229331	0.139138	0.0303907	0	0	0
18	ENSDARG00000104197	ptpn22	-0.12932	1.22201	0.0281362	0	0	0
18	ENSDARG00000041665	mkrn1	0.0868057	0.259925	-0.0195245	0	0	0
18	ENSDARG00000099420	nme2b.2	0.380852	1.25958	-0.0287178	0	0	0
18	ENSDARG00000076229	mrtfab	0.214305	0.0575972	-0.0340752	0	0	0
18	ENSDARG00000067630	zgc:154075	-0.181167	0.582976	-0.0816371	0	0	0
18	ENSDARG00000094996	sult1st9	-0.46996	1.73393	-0.0848005	0	0	0
18	ENSDARG00000104181	tmsb1	0.0158676	-0.265688	-0.125667	0	0	0
18	ENSDARG00000068432	si:dkey-56m19.5	0.016504	0.684563	-0.146386	0	0	0
18	ENSDARG00000052701	smpd2b	-0.387391	-0.0274822	-0.200049	0	0	0
18	ENSDARG00000088641	grn2	-0.49884	1.44483	-0.218834	0	0	0
18	ENSDARG00000018145	mid1ip1l	0.021557	-0.0484466	-0.271373	0	0	0
18	ENSDARG00000063682	fhod3a	0.13991	1.20638	-0.271517	0	0	0
18	ENSDARG00000012435	spic	-0.945751	0.413179	-0.317025	0	0	0
18	ENSDARG00000099690	vaspa	-0.470338	0.10637	-0.317677	0	0	0
18	ENSDARG00000061762	trim108	0.441599	0.21331	-0.34939	0	0	0
18	ENSDARG00000099342	crfb15	-0.699856	-0.256063	-0.393415	0	0	0
18	ENSDARG00000088439	gm2a	-0.141748	-0.0383435	-0.442186	0	0	0
18	ENSDARG00000011449	fes	-0.367065	-0.23437	-0.531189	0	0	0
18	ENSDARG00000009336	aif1l	-0.52946	1.30988	-0.614394	0	0	0
18	ENSDARG00000004979	elovl5	-0.251822	0.511818	-0.618112	0	0	0
18	ENSDARG00000009430	tmem30c	-0.156997	0.104482	-0.665827	0	0	0
18	ENSDARG00000030269	grtp1b	-0.24669	-0.263493	-0.72606	0	0	0
18	ENSDARG00000026548	cyp2u1	0.0549449	-0.501064	-0.82972	0	0	0
18	ENSDARG00000009087	cd74a	-0.138294	-1.13599	-1.03917	0	0	0
18	ENSDARG00000104398	si:ch73-343g19.4	-1.26751	-0.936148	-1.10677	0	0	0
18	ENSDARG00000117364	CU928222.3	-1.01196	0.0262735	-1.1136	0	0	0
18	ENSDARG00000039439	il22ra2	-1.55451	0.729461	-1.12574	0	0	0
18	ENSDARG00000079166	ace	0.0259657	0.0310673	-1.43261	0	0	0
18	ENSDARG00000102076	spink2.1	0.204117	0.0460217	-1.4951	0	0	0
18	ENSDARG00000054542	il12bb	-0.977238	-0.256893	-1.66173	0	0	0
18	ENSDARG00000076981	zgc:198329	-0.636024	-0.0733386	-2.03626	0	0	1
18	ENSDARG00000102555	si:dkey-33i11.9	-0.249867	-0.789537	-2.82968	0	0	1
18	ENSDARG00000104256	bco1	0.0352625	-0.748136	-2.84659	0	0	1

## Sheet: mesenchymal cells (19)
mesenchymal cells	ensembl_gene_id	gene	hnf4gCV2.vs.WTCV2 log2	hnf4aCV1.vs.WTCV1 log2	hnf4a_hnf4gCR3.vs.WTCR3 log2	hnf4gCV2.vs.WTCV2 significant	hnf4aCV1.vs.WTCV1 significant	hnf4a_hnf4gCR3.vs.WTCR3 significant
19	ENSDARG00000015355	fosl1a	-0.620148	2.77628	3.75379	0	1	1
19	ENSDARG00000104773	junbb	-0.166146	1.11687	3.4032	0	0	1
19	ENSDARG00000031683	fosab	0.606501	-0.0510552	3.34848	0	0	1
19	ENSDARG00000055751	fosb	0.770093	0.195999	2.59624	0	0	1
19	ENSDARG00000056795	serpine1	-0.791746	1.89227	2.56039	0	1	1
19	ENSDARG00000099195	ier2a	0.286002	0.630644	2.36436	0	0	1
19	ENSDARG00000022303	higd1a	-0.0096154	1.62972	2.35852	0	0	1
19	ENSDARG00000073786	cmbl	0.581366	1.03526	2.33948	0	0	1
19	ENSDARG00000075261	timp2b	-0.871452	2.81158	2.15345	0	1	1
19	ENSDARG00000037804	phlda3	-0.336964	2.24422	2.1038	0	1	1
19	ENSDARG00000012405	col1a1a	0.177218	1.19348	1.75687	0	0	1
19	ENSDARG00000103129	nid1b	0.189281	1.10162	1.58929	0	0	0
19	ENSDARG00000101135	si:dkey-85k7.7	0.543553	1.39494	1.58112	0	0	0
19	ENSDARG00000038941	ppp1r1c	0.0424676	2.13994	1.55214	0	1	0
19	ENSDARG00000055575	pcolce2b	0.379351	1.25265	1.53552	0	0	0
19	ENSDARG00000013430	bhmt	-0.154823	0.885437	1.48578	0	0	0
19	ENSDARG00000035809	col1a1b	0.136389	0.758924	1.46613	0	0	0
19	ENSDARG00000018856	dclk1a	-0.372743	1.47504	1.45956	0	0	0
19	ENSDARG00000059367	mfap2	0.144959	1.0152	1.4326	0	0	0
19	ENSDARG00000005673	f3b	-0.0740018	0.957925	1.37509	0	0	0
19	ENSDARG00000026165	col11a1a	0.249244	1.84832	1.36494	0	1	0
19	ENSDARG00000087196	fibinb	0.0119297	1.91561	1.33307	0	1	0
19	ENSDARG00000032324	epb41l5	-0.143027	0.878367	1.31199	0	0	0
19	ENSDARG00000036036	mdka	-0.142008	1.31354	1.30548	0	0	0
19	ENSDARG00000020007	col1a2	0.162874	0.941386	1.29599	0	0	0
19	ENSDARG00000012422	col11a2	0.135482	0.61279	1.29452	0	0	0
19	ENSDARG00000077811	sox11a	-0.0250453	1.4471	1.16611	0	0	0
19	ENSDARG00000004782	fgfr3	0.188985	0.944657	1.15942	0	0	0
19	ENSDARG00000037845	col9a3	-0.233226	4.27347	1.15644	0	1	0
19	ENSDARG00000014646	aoc2	-0.155745	0.769985	1.13889	0	0	0
19	ENSDARG00000007241	mycb	-0.892684	0.457186	1.13728	0	0	0
19	ENSDARG00000058128	msna	-0.260008	1.22183	1.12071	0	0	0
19	ENSDARG00000000002	ccdc80	0.0793567	0.928412	1.11909	0	0	0
19	ENSDARG00000032617	fgfrl1a	0.183489	1.13089	1.09782	0	0	0
19	ENSDARG00000039576	fstl1b	0.0396249	1.24267	1.06781	0	0	0
19	ENSDARG00000071586	tgfbi	-0.0549304	1.23369	1.05858	0	0	0
19	ENSDARG00000051748	ccnd2a	-0.130964	1.25563	1.04018	0	0	0
19	ENSDARG00000034268	slit3	0.0784407	0.434662	1.01908	0	0	0
19	ENSDARG00000052057	pcolceb	-0.097938	2.23207	1.00752	0	1	0
19	ENSDARG00000031981	pcbd1	-0.114438	0.860765	0.987987	0	0	0
19	ENSDARG00000011973	slc35d1a	0.0741372	0.880831	0.977547	0	0	0
19	ENSDARG00000035521	sfrp1a	-0.166147	0.827304	0.974001	0	0	0
19	ENSDARG00000079302	and2	0.28939	1.70623	0.968348	0	0	0
19	ENSDARG00000012593	col5a1	0.142549	1.04798	0.966626	0	0	0
19	ENSDARG00000102340	ptn	0.137611	1.28408	0.922241	0	0	0
19	ENSDARG00000043066	nog2	0.0900534	0.632196	0.902292	0	0	0
19	ENSDARG00000000666	creg2	0.0433469	0.69287	0.894902	0	0	0
19	ENSDARG00000019601	col12a1b	-0.0499189	1.04316	0.894443	0	0	0
19	ENSDARG00000031678	col5a2a	0.00433587	1.08568	0.886262	0	0	0
19	ENSDARG00000040944	ntd5	0.247567	1.69824	0.885472	0	0	0
19	ENSDARG00000013976	anxa13	-0.205359	1.20691	0.881505	0	0	0
19	ENSDARG00000074908	col6a1	0.0570274	0.364763	0.879615	0	0	0
19	ENSDARG00000036080	cd81a	0.0352539	1.14115	0.853874	0	0	0
19	ENSDARG00000055053	itih1	0.239376	3.49014	0.851973	0	1	0
19	ENSDARG00000003449	pde10a	0.0978344	1.17685	0.849868	0	0	0
19	ENSDARG00000012066	dcn	0.323664	1.10524	0.848418	0	0	0
19	ENSDARG00000100133	cnmd	-0.189537	3.65369	0.840014	0	1	0
19	ENSDARG00000056427	auts2a	0.0114133	0.710449	0.834869	0	0	0
19	ENSDARG00000036893	f13a1b	0.269761	1.99079	0.814973	0	1	0
19	ENSDARG00000105562	si:dkey-23i12.7	-1.37826	1.81079	0.807692	0	1	0
19	ENSDARG00000053864	elmsan1b	-0.0525689	0.909583	0.795315	0	0	0
19	ENSDARG00000093440	tnfaip6	-0.106396	1.77406	0.794369	0	1	0
19	ENSDARG00000002235	mmp14a	0.218555	1.83647	0.792754	0	1	0
19	ENSDARG00000077121	cyp26b1	0.138313	2.28891	0.772863	0	1	0
19	ENSDARG00000093303	ifitm1	-0.335126	1.51328	0.764947	0	0	0
19	ENSDARG00000109337	nanos1	0.234662	0.896698	0.76467	0	0	0
19	ENSDARG00000024829	tnn	-0.0903675	2.0755	0.752774	0	1	0
19	ENSDARG00000068369	angptl2b	-0.175874	1.73448	0.735667	0	0	0
19	ENSDARG00000033307	igf2b	0.0617777	1.18681	0.724237	0	0	0
19	ENSDARG00000054906	ier5l	-0.0864695	1.65794	0.719734	0	0	0
19	ENSDARG00000021973	st13	-0.0531835	0.318856	0.701512	0	0	0
19	ENSDARG00000056134	c1qtnf5	0.653768	1.4131	0.682995	0	0	0
19	ENSDARG00000099491	tmem176l.1	-0.230403	1.40181	0.668394	0	0	0
19	ENSDARG00000077298	gas1a	0.0245154	0.956237	0.662127	0	0	0
19	ENSDARG00000056913	pcolcea	0.162558	0.838653	0.653966	0	0	0
19	ENSDARG00000011876	ednraa	0.0175171	0.89995	0.650797	0	0	0
19	ENSDARG00000091481	foxc1a	0.299884	1.16084	0.635209	0	0	0
19	ENSDARG00000078322	col12a1a	0.136753	1.03394	0.630884	0	0	0
19	ENSDARG00000061226	timp2a	0.352426	0.926995	0.630282	0	0	0
19	ENSDARG00000068732	spry4	0.00371721	1.12056	0.62978	0	0	0
19	ENSDARG00000005924	serpina10a	-0.0370332	1.15349	0.629371	0	0	0
19	ENSDARG00000017676	mmp2	0.210375	1.59796	0.614458	0	0	0
19	ENSDARG00000030215	matn1	0.357804	3.39775	0.614356	0	1	0
19	ENSDARG00000029353	serpine2	-0.254667	1.16448	0.597054	0	0	0
19	ENSDARG00000012071	angptl1a	0.221871	0.873149	0.590509	0	0	0
19	ENSDARG00000015015	tspan18b	0.01078	0.878327	0.584441	0	0	0
19	ENSDARG00000056087	ecrg4a	0.147317	2.22787	0.577824	0	1	0
19	ENSDARG00000059933	plpp3	0.103064	1.02255	0.573819	0	0	0
19	ENSDARG00000062129	mxra8b	0.257912	1.277	0.573324	0	0	0
19	ENSDARG00000068265	tomm5	0.0333111	0.806556	0.568204	0	0	0
19	ENSDARG00000073699	col9a1a	0.0292072	3.95936	0.545621	0	1	0
19	ENSDARG00000042690	s1pr1	-0.0681414	1.16349	0.543671	0	0	0
19	ENSDARG00000024492	col9a2	-0.172197	3.49736	0.533089	0	1	0
19	ENSDARG00000062936	ndnf	0.0120339	0.504928	0.528092	0	0	0
19	ENSDARG00000070494	pdgfra	0.160314	0.630004	0.526483	0	0	0
19	ENSDARG00000104110	col4a2	0.0660741	0.264257	0.516788	0	0	0
19	ENSDARG00000045694	prickle1b	0.285808	0.843265	0.510512	0	0	0
19	ENSDARG00000022509	cox4i2	0.443256	0.768523	0.507663	0	0	0
19	ENSDARG00000052437	mia	0.695675	2.73763	0.504238	0	1	0
19	ENSDARG00000092035	si:ch211-156j16.1	-0.0231863	0.842412	0.495862	0	0	0
19	ENSDARG00000038025	cbx7a	0.183676	1.5614	0.495659	0	0	0
19	ENSDARG00000010032	cmtm7	-0.033307	1.26094	0.490373	0	0	0
19	ENSDARG00000103443	vwde	0.516211	1.57355	0.481922	0	0	0
19	ENSDARG00000074242	serbp1a	0.173115	-0.0616646	0.472963	0	0	0
19	ENSDARG00000093549	selenop	0.183691	0.474509	0.472517	0	0	0
19	ENSDARG00000100968	si:ch211-1a19.3	0.110503	0.336221	0.472241	0	0	0
19	ENSDARG00000035682	FP102018.1	0.202685	1.21135	0.471574	0	0	0
19	ENSDARG00000037895	ramp2	0.200284	1.04087	0.459886	0	0	0
19	ENSDARG00000004363	lhfpl6	0.00312241	0.233854	0.457599	0	0	0
19	ENSDARG00000015312	klf12a	0.139668	1.02102	0.454623	0	0	0
19	ENSDARG00000056627	cxcl14	0.138552	0.30339	0.433089	0	0	0
19	ENSDARG00000060457	pmp22b	0.202923	0.662298	0.42835	0	0	0
19	ENSDARG00000074335	boc	0.139223	0.94301	0.416556	0	0	0
19	ENSDARG00000054438	fzd2	0.0955018	0.981959	0.414254	0	0	0
19	ENSDARG00000059049	zgc:174904	-0.343671	0.383812	0.409458	0	0	0
19	ENSDARG00000056995	snai1a	0.130832	0.763152	0.408328	0	0	0
19	ENSDARG00000038056	fgfbp2b	0.694459	2.64066	0.404062	0	1	0
19	ENSDARG00000069093	col2a1a	-0.28205	3.5233	0.400961	0	1	0
19	ENSDARG00000061328	cdon	0.124682	0.504273	0.395386	0	0	0
19	ENSDARG00000103211	si:dkey-19b23.8	-0.416974	1.28626	0.39112	0	0	0
19	ENSDARG00000101914	metrnla	-0.0592968	0.322904	0.386293	0	0	0
19	ENSDARG00000094809	ms4a17a.11	-0.0011778	1.39968	0.38161	0	0	0
19	ENSDARG00000013351	cirbpb	0.0868788	0.468662	0.379069	0	0	0
19	ENSDARG00000108475	otos	0.19621	3.04142	0.373173	0	1	0
19	ENSDARG00000011724	marveld1	0.0138144	1.31802	0.37068	0	0	0
19	ENSDARG00000039273	fbln5	0.440627	0.721207	0.369757	0	0	0
19	ENSDARG00000056950	epyc	-0.117818	2.97933	0.359686	0	1	0
19	ENSDARG00000014378	slc12a4	-0.0996022	0.295936	0.355166	0	0	0
19	ENSDARG00000060004	fzd7a	-0.040334	0.844551	0.325496	0	0	0
19	ENSDARG00000010434	clu	0.174697	1.3205	0.322577	0	0	0
19	ENSDARG00000044251	rasgef1bb	0.123196	0.450143	0.318811	0	0	0
19	ENSDARG00000045979	zgc:153704	0.181553	1.13156	0.312623	0	0	0
19	ENSDARG00000055498	si:ch1073-184j22.1	-0.0981623	0.995535	0.300244	0	0	0
19	ENSDARG00000100446	si:ch211-286o17.1	0.222085	0.655241	0.285486	0	0	0
19	ENSDARG00000005485	ucmab	-0.0002564	3.22742	0.282266	0	1	0
19	ENSDARG00000100946	si:ch211-212k18.9	0.271662	0.352481	0.236067	0	0	0
19	ENSDARG00000007275	si:ch211-251b21.1	0.301234	0.584035	0.229943	0	0	0
19	ENSDARG00000094295	CR855337.1	-0.0715158	0.475772	0.216063	0	0	0
19	ENSDARG00000021366	fbp1a	0.380553	0.800229	0.203856	0	0	0
19	ENSDARG00000078659	tmem176	0.10584	1.26901	0.201056	0	0	0
19	ENSDARG00000004714	tcf12	0.255483	0.876217	0.196255	0	0	0
19	ENSDARG00000054916	eif4ebp3	0.0560231	0.347277	0.195519	0	0	0
19	ENSDARG00000037116	cxcl12a	0.177634	1.2858	0.1908	0	0	0
19	ENSDARG00000055398	foxc1b	-0.0186165	1.56531	0.163857	0	0	0
19	ENSDARG00000015266	mab21l2	-0.0500659	0.391176	0.120297	0	0	0
19	ENSDARG00000074667	akt1s1	0.181381	0.156131	0.116526	0	0	0
19	ENSDARG00000092383	snorc	0.282542	3.61334	0.115487	0	1	0
19	ENSDARG00000052615	tnmd	0.538106	1.87693	0.101371	0	1	0
19	ENSDARG00000052846	fsta	0.27195	0.458047	0.0957608	0	0	0
19	ENSDARG00000105223	pmp22a	0.150271	1.0357	0.0909161	0	0	0
19	ENSDARG00000035891	acana	0.38324	1.67285	0.0695672	0	0	0
19	ENSDARG00000071673	ctdspla	0.427283	0.448333	0.0622656	0	0	0
19	ENSDARG00000054451	loxl1	0.161591	1.3965	0.0392545	0	0	0
19	ENSDARG00000076010	twist1b	0.261541	1.49523	0.0337559	0	0	0
19	ENSDARG00000015937	kptn	0.186234	0.23238	0.0251211	0	0	0
19	ENSDARG00000075015	soul5	0.0269601	-0.168853	0.0163606	0	0	0
19	ENSDARG00000030402	twist1a	0.0856214	1.01455	-0.0116575	0	0	0
19	ENSDARG00000027582	angptl7	0.177233	2.5368	-0.0257058	0	1	0
19	ENSDARG00000101481	rbp5	-0.199405	0.345402	-0.076883	0	0	0
19	ENSDARG00000021443	zfp36l1b	0.0196684	-0.181002	-0.0867343	0	0	0
19	ENSDARG00000070873	ccl25b	0.078776	1.32118	-0.110046	0	0	0
19	ENSDARG00000074869	si:ch1073-291c23.2	0.266712	0.761812	-0.110694	0	0	0
19	ENSDARG00000063612	antxr1c	0.141295	0.525465	-0.121148	0	0	0
19	ENSDARG00000044895	fmoda	0.505748	1.41469	-0.125415	0	0	0
19	ENSDARG00000011934	gyg1a	0.126057	0.333146	-0.156536	0	0	0
19	ENSDARG00000097617	si:ch211-178n15.1	0.0103014	1.39535	-0.179506	0	0	0
19	ENSDARG00000044935	hpdb	0.521965	0.380146	-0.208402	0	0	0
19	ENSDARG00000025670	fstl3	0.073118	1.935	-0.223179	0	1	0
19	ENSDARG00000117319	CABZ01092746.1	0.242581	0.381065	-0.23348	0	0	0
19	ENSDARG00000019646	twist3	0.587161	1.19617	-0.246211	0	0	0
19	ENSDARG00000019949	serpinh1b	-1.3221	2.51636	-0.249982	0	1	0
19	ENSDARG00000044132	ogna	0.518663	1.26651	-0.250769	0	0	0
19	ENSDARG00000101199	rbp4	-0.0629522	-0.634061	-0.283818	0	0	0
19	ENSDARG00000071095	abi3bpb	0.495013	0.857385	-0.313634	0	0	0
19	ENSDARG00000089418	si:dkey-164f24.2	0.467069	-0.289403	-0.441294	0	0	0
19	ENSDARG00000022650	cyp2ad3	-0.0270028	0.406034	-0.488847	0	0	0
19	ENSDARG00000020072	thbs4b	0.32531	1.44032	-0.511825	0	0	0
19	ENSDARG00000059391	gyg1b	-0.0329442	0.824971	-0.550468	0	0	0
19	ENSDARG00000016551	iqsec1b	-0.235404	-0.0725033	-0.599544	0	0	0
19	ENSDARG00000027984	gstz1	-0.0453677	-0.427268	-0.602201	0	0	0
19	ENSDARG00000043796	ms4a17a.7	0.420153	2.435	-0.708193	0	1	0
19	ENSDARG00000020143	pah	-0.0338857	0.594995	-0.713653	0	0	0
19	ENSDARG00000026611	socs3b	-0.391777	0.651843	-0.735919	0	0	0
19	ENSDARG00000006546	ak4	-0.0333789	-0.447593	-0.73704	0	0	0
19	ENSDARG00000089187	wfdc2	0.416679	2.12952	-0.754438	0	1	0
19	ENSDARG00000006526	fn1b	-0.132595	-0.538918	-0.800068	0	0	0
19	ENSDARG00000053485	aldh6a1	0.0622086	-0.399545	-0.842548	0	0	0
19	ENSDARG00000114760	asip2b	0.730279	1.0336	-0.845995	0	0	0
19	ENSDARG00000068710	nid1a	-0.496327	-0.502243	-0.918076	0	0	0
19	ENSDARG00000100795	timp4.3	-0.122673	1.08104	-0.953896	0	0	0
19	ENSDARG00000055897	zgc:154093	-0.198796	-0.95018	-0.980641	0	0	0
19	ENSDARG00000010008	vim	0.365003	0.257138	-0.997347	0	0	0
19	ENSDARG00000093381	tgm2l	-0.218691	1.34604	-1.02384	0	0	0
19	ENSDARG00000087697	lpl	0.132733	-0.445362	-1.09215	0	0	0
19	ENSDARG00000020053	nkd1	-0.0157154	0.00049227	-1.13294	0	0	0
19	ENSDARG00000011693	ttc36	-0.115339	0.016952	-1.40614	0	0	0
19	ENSDARG00000092033	si:dkey-239h2.3	0.420878	0.391908	-1.41621	0	0	0
19	ENSDARG00000023151	ucp1	0.383657	-1.52182	-1.44752	0	0	0
19	ENSDARG00000058005	hgd	-0.0816964	-1.10771	-1.7597	0	0	1
19	ENSDARG00000069630	tat	0.102942	0.162841	-1.81204	0	0	1

[truncated: 3 more sheets: red blood cells (25), unknown (24), epidermis (23, 26)]
